# Supplementary material for: 2-Aryl-1-hydroxyimidazoles possessing antiviral activity against a wide range of orthopoxviruses, including the variola virus
Source: Royal Society of Chemistry journal article supplement (doi:10.1039/d4md00181h), 2024-01-01

## *Supporting Information*

### **2-Aryl-1-hydroxyimidazoles possessing antiviral activity against wide range of orthopoxviruses including *Variola virus*.**

Elizaveta I. Basanova,<sup>\*a</sup> Ekaterina A. Kulikova,<sup>a</sup> Nikolai I. Bormotov,<sup>b</sup> Olga A. Serova,<sup>b</sup> Larisa N. Shishkina,<sup>b</sup> Alyona S. Ovchinnikova,<sup>b</sup> Dmitry A. Odnoshevskiy,<sup>b</sup> Oleg V. Pyankov,<sup>b</sup> Alexander P. Agafonov,<sup>b</sup> Olga I. Yarovaya,<sup>c</sup> Sophia S. Borisevich,<sup>d</sup> Margarita G. Ilyina,<sup>d</sup> Dmitry S. Kolybalov,<sup>c</sup> Sergey G. Arkhipov,<sup>c</sup> Nikita E. Bogdanov,<sup>c,f</sup> Marina A. Pavlova,<sup>g</sup> Nariman F. Salakhutdinov,<sup>c</sup> Valery P. Perevalov,<sup>a</sup> Polina A. Nikitina.<sup>\*a</sup>

<sup>1</sup>Department of Fine Organic Synthesis and Chemistry of Dyes, D.I. Mendeleev University of Chemical Technology of Russia, Miusskaya sq., 9, 125047, Moscow, Russia

<sup>2</sup>State Research Center of Virology and Biotechnology VECTOR, Rospotrebnadzor, 630559, Koltsovo, Russia

<sup>3</sup>Department of Medicinal Chemistry, N.N. Vorozhtsov Institute of Organic Chemistry SB RAS, Lavrentyev Ave., 9, 630090, Novosibirsk, Russia

<sup>4</sup>SRF “SKIF”, 630559, Koltsovo, Russia

<sup>5</sup>Scientific Educational Center “Institute of Chemical Technology”, Novosibirsk State University, Pirogova str., 1, 630090, Novosibirsk, Russia

<sup>6</sup>V.S. Sobolev Institute of Geology and Mineralogy, Siberian Branch of Russian Academy of Sciences, Koptyuga Ave., 3, 630090 Novosibirsk, Russia

<sup>7</sup>Laboratory of Photoactive Supramolecular Systems, A.N. Nesmeyanov Institute of Organoelement Compounds RAS, Vavilova str., 28, 119991, Moscow, Russia

### Content

|                                                                                                                                                                            |          |
|----------------------------------------------------------------------------------------------------------------------------------------------------------------------------|----------|
| <b>Single crystal x-ray analysis.....</b>                                                                                                                                  | <b>2</b> |
| <b>Evaluation of antiviral activity .....</b>                                                                                                                              | <b>4</b> |
| <b>Copies of <sup>1</sup>H and <sup>13</sup>C NMR, HSQC, HMBC spectra, HRMS (ESI) and HRMS (EI) for 4a-c, 5a-e, 6a-b, 7a-e, 8a-c, 9a, 9c, 10a-b, 11a-e, 12 and 13.....</b> | <b>7</b> |

## Single crystal x-ray analysis.

**Table S1.** Crystallographic characteristics, details of the experiments and structure refinement for compounds **5a-5c**

| Parameter/substance                                                         | <b>5a</b>                                                                          | <b>5b</b>                                                                          | <b>5c</b>                                                                          | <b>semihydrate 5c</b>                                                              |
|-----------------------------------------------------------------------------|------------------------------------------------------------------------------------|------------------------------------------------------------------------------------|------------------------------------------------------------------------------------|------------------------------------------------------------------------------------|
| Chemical formula                                                            | C <sub>12</sub> H <sub>11</sub> N <sub>3</sub> O <sub>4</sub>                      | C <sub>13</sub> H <sub>11</sub> N <sub>3</sub> O <sub>2</sub>                      | C <sub>13</sub> H <sub>11</sub> F <sub>3</sub> N <sub>2</sub> O <sub>2</sub>       | C <sub>26</sub> H <sub>24</sub> F <sub>6</sub> N <sub>4</sub> O <sub>5</sub>       |
| <i>M</i> , g/mol                                                            | 261.24                                                                             | 241.25                                                                             | 284.24                                                                             | 586.49                                                                             |
| Temperature, K                                                              | 295(4)                                                                             | 293(2)                                                                             | 295(4)                                                                             | 295(4)                                                                             |
| Crystal system                                                              | triclinic                                                                          | monoclinic                                                                         | monoclinic                                                                         | triclinic                                                                          |
| Space group                                                                 | P-1                                                                                | P2 <sub>1</sub> /c                                                                 | Ia                                                                                 | P-1                                                                                |
| <i>a</i> , Å                                                                | 6.2902(6)                                                                          | 13.6508(11)                                                                        | 15.7230(16)                                                                        | 9.7912(6)                                                                          |
| <i>b</i> , Å                                                                | 7.3546(7)                                                                          | 6.9360(8)                                                                          | 14.3769(9)                                                                         | 11.5563(9)                                                                         |
| <i>c</i> , Å                                                                | 12.9978(11)                                                                        | 12.6244(12)                                                                        | 23.665(2)                                                                          | 12.0456(8)                                                                         |
| <i>α</i> , deg                                                              | 85.350(7)                                                                          | 90                                                                                 | 90                                                                                 | 91.342(6)                                                                          |
| <i>β</i> , deg                                                              | 88.976(7)                                                                          | 93.350(8)                                                                          | 105.339(10)                                                                        | 101.399(5)                                                                         |
| <i>γ</i> , deg                                                              | 83.526(7)                                                                          | 90                                                                                 | 90                                                                                 | 97.183(6)                                                                          |
| <i>V</i> , Å <sup>3</sup>                                                   | 595.47(9)                                                                          | 1193.3(2)                                                                          | 5159.0(8)                                                                          | 1323.97(16)                                                                        |
| <i>Z</i>                                                                    | 2                                                                                  | 4                                                                                  | 4                                                                                  | 2                                                                                  |
| <i>ρ</i> <sub>calc</sub> , g/cm <sup>3</sup>                                | 1.457                                                                              | 1.343                                                                              | 1.464                                                                              | 1.471                                                                              |
| <i>μ</i> , mm <sup>-1</sup>                                                 | 0.112                                                                              | 0.094                                                                              | 0.129                                                                              | 0.130                                                                              |
| <i>F</i> (000)                                                              | 272.0                                                                              | 504.0                                                                              | 2336.0                                                                             | 604.0                                                                              |
| Crystal size, mm <sup>3</sup>                                               | 0.07 × 0.05 × 0.02                                                                 | 0.2 × 0.04 × 0.04                                                                  | 0.3 × 0.025 × 0.01                                                                 | 0.5 × 0.02 × 0.02                                                                  |
| 2 $\theta$ range for data collection, deg                                   | 5.592 to 56.13                                                                     | 6.466 to 56.282                                                                    | 5.61 to 56.454                                                                     | 4.282 to 52.766                                                                    |
| <i>h</i> , <i>k</i> , <i>l</i> intervals                                    | -8 ≤ <i>h</i> ≤ 8,<br>-9 ≤ <i>k</i> ≤ 9,<br>-17 ≤ <i>l</i> ≤ 15                    | -16 ≤ <i>h</i> ≤ 18,<br>-9 ≤ <i>k</i> ≤ 9,<br>-16 ≤ <i>l</i> ≤ 15                  | -20 ≤ <i>h</i> ≤ 20,<br>-18 ≤ <i>k</i> ≤ 18,<br>-30 ≤ <i>l</i> ≤ 30                | -12 ≤ <i>h</i> ≤ 12,<br>-14 ≤ <i>k</i> ≤ 13,<br>-14 ≤ <i>l</i> ≤ 15                |
| Measured reflections                                                        | 6217                                                                               | 12229                                                                              | 16053                                                                              | 13672                                                                              |
| Independent reflections [ <i>R</i> <sub>int</sub> , <i>R</i> <sub>σ</sub> ] | 2379<br>[ <i>R</i> <sub>int</sub> = 0.0212,<br><i>R</i> <sub>sigma</sub> = 0.0361] | 2501<br>[ <i>R</i> <sub>int</sub> = 0.0422,<br><i>R</i> <sub>sigma</sub> = 0.0367] | 9353<br>[ <i>R</i> <sub>int</sub> = 0.0466,<br><i>R</i> <sub>sigma</sub> = 0.0710] | 5051<br>[ <i>R</i> <sub>int</sub> = 0.0496,<br><i>R</i> <sub>sigma</sub> = 0.0744] |
| Data/restraints/parameters                                                  | 2379/0/175                                                                         | 2501/0/168                                                                         | 9353/25/836                                                                        | 5051/6/406                                                                         |
| <i>GOOF</i> on <i>F</i> <sup>2</sup>                                        | 1.027                                                                              | 1.037                                                                              | 1.001                                                                              | 1.055                                                                              |
| <i>R</i> factor ( <i>I</i> > 2σ( <i>I</i> ))                                | <i>R</i> <sub>1</sub> = 0.0488,<br>w <i>R</i> <sub>2</sub> = 0.1285                | <i>R</i> <sub>1</sub> = 0.0479,<br>w <i>R</i> <sub>2</sub> = 0.1230                | <i>R</i> <sub>1</sub> = 0.0515,<br>w <i>R</i> <sub>2</sub> = 0.1119                | <i>R</i> <sub>1</sub> = 0.0559,<br>w <i>R</i> <sub>2</sub> = 0.1510                |
| <i>R</i> factor (all data)                                                  | <i>R</i> <sub>1</sub> = 0.0721,<br>w <i>R</i> <sub>2</sub> = 0.1400                | <i>R</i> <sub>1</sub> = 0.0739,<br>w <i>R</i> <sub>2</sub> = 0.1354                | <i>R</i> <sub>1</sub> = 0.0993,<br>w <i>R</i> <sub>2</sub> = 0.1299                | <i>R</i> <sub>1</sub> = 0.0740,<br>w <i>R</i> <sub>2</sub> = 0.1625                |
| $\Delta\rho_{\max} / \Delta\rho_{\min}$ , e/Å <sup>-3</sup>                 | 0.17/-0.15                                                                         | 0.14/-0.20                                                                         | 0.12/-0.15                                                                         | 0.28/-0.25                                                                         |
| CCDC deposition number                                                      | 2340418                                                                            | 2340435                                                                            | 2331165                                                                            | 2340465                                                                            |

**Table S2.** Crystallographic characteristics, details of the experiments and structure refinement for compounds **4b,c, 6a and 11b**

| Parameter/substance                                                         | <b>4b</b>                                                                | <b>4c</b>                                                                    | <b>6a</b>                                                                | <b>11b</b>                                                               |
|-----------------------------------------------------------------------------|--------------------------------------------------------------------------|------------------------------------------------------------------------------|--------------------------------------------------------------------------|--------------------------------------------------------------------------|
| Chemical formula                                                            | C <sub>16</sub> H <sub>15</sub> N <sub>3</sub> O <sub>2</sub>            | C <sub>16</sub> H <sub>15</sub> F <sub>3</sub> N <sub>2</sub> O <sub>2</sub> | C <sub>16</sub> H <sub>17</sub> N <sub>3</sub> O <sub>4</sub>            | C <sub>22</sub> H <sub>20</sub> BrN <sub>3</sub> O <sub>4</sub>          |
| <i>M</i> , g/mol                                                            | 281.31                                                                   | 324.30                                                                       | 315.32                                                                   | 470.32                                                                   |
| Temperature, K                                                              | 298(4)                                                                   | 298(4)                                                                       | 293(2)                                                                   | 295(4)                                                                   |
| Crystal system                                                              | monoclinic                                                               | monoclinic                                                                   | triclinic                                                                | triclinic                                                                |
| Space group                                                                 | P2 <sub>1</sub> /n                                                       | P2 <sub>1</sub> /c                                                           | P-1                                                                      | P-1                                                                      |
| <i>a</i> , Å                                                                | 5.7707(9)                                                                | 5.8260(13)                                                                   | 8.7742(9)                                                                | 9.339(2)                                                                 |
| <i>b</i> , Å                                                                | 24.525(3)                                                                | 25.780(3)                                                                    | 9.1629(9)                                                                | 13.222(2)                                                                |
| <i>c</i> , Å                                                                | 10.1461(17)                                                              | 11.897(3)                                                                    | 10.6026(10)                                                              | 18.311(4)                                                                |
| $\alpha$ , deg                                                              | 90                                                                       | 90                                                                           | 86.044(8)                                                                | 78.539(16)                                                               |
| $\beta$ , deg                                                               | 93.696(17)                                                               | 122.66(3)                                                                    | 88.978(8)                                                                | 77.793(19)                                                               |
| $\gamma$ , deg                                                              | 90                                                                       | 90                                                                           | 65.694(9)                                                                | 77.049(17)                                                               |
| <i>V</i> , Å <sup>3</sup>                                                   | 1432.9(4)                                                                | 1504.4(7)                                                                    | 774.96(14)                                                               | 2126.5(8)                                                                |
| <i>Z</i>                                                                    | 4                                                                        | 4                                                                            | 2                                                                        | 4                                                                        |
| $\rho_{\text{calc}}$ , g/cm <sup>3</sup>                                    | 1.304                                                                    | 1.432                                                                        | 1.351                                                                    | 1.469                                                                    |
| $\mu$ , mm <sup>-1</sup>                                                    | 0.089                                                                    | 0.120                                                                        | 0.099                                                                    | 1.967                                                                    |
| <i>F</i> (000)                                                              | 592.0                                                                    | 672.0                                                                        | 332.0                                                                    | 960.0                                                                    |
| Crystal size, mm <sup>3</sup>                                               | 0.1 × 0.05 × 0.02                                                        | 0.25 × 0.18 × 0.01                                                           | 0.25 × 0.18 × 0.01                                                       | 0.2 × 0.05 × 0.05                                                        |
| 2 $\Theta$ range for data collection, deg                                   | 4.352 to 56.456                                                          | 5.15 to 56.384                                                               | 5.094 to 56.522                                                          | 4.232 to 52.804                                                          |
| <i>h, k, l</i> intervals                                                    | -7 ≤ <i>h</i> ≤ 7, -31 ≤ <i>k</i> ≤ 29, -13 ≤ <i>l</i> ≤ 13              | -7 ≤ <i>h</i> ≤ 7, -30 ≤ <i>k</i> ≤ 33, -15 ≤ <i>l</i> ≤ 15                  | -11 ≤ <i>h</i> ≤ 11, -11 ≤ <i>k</i> ≤ 11, -13 ≤ <i>l</i> ≤ 14            | -11 ≤ <i>h</i> ≤ 11, -15 ≤ <i>k</i> ≤ 16, -22 ≤ <i>l</i> ≤ 22            |
| Measured reflections                                                        | 14927                                                                    | 15466                                                                        | 8302                                                                     | 16882                                                                    |
| Independent reflections [ <i>R</i> <sub>int</sub> , <i>R</i> <sub>σ</sub> ] | 3107 [ <i>R</i> <sub>int</sub> = 0.0904, <i>R</i> <sub>σ</sub> = 0.0832] | 3203 [ <i>R</i> <sub>int</sub> = 0.0620, <i>R</i> <sub>σ</sub> = 0.0575]     | 3097 [ <i>R</i> <sub>int</sub> = 0.0189, <i>R</i> <sub>σ</sub> = 0.0252] | 7829 [ <i>R</i> <sub>int</sub> = 0.0916, <i>R</i> <sub>σ</sub> = 0.1519] |
| Data/restraints /parameters                                                 | 3107/1/195                                                               | 3203/36/238                                                                  | 3097/0/211                                                               | 7829/0/545                                                               |
| <i>GOOF</i> on <i>F</i> <sup>2</sup>                                        | 1.039                                                                    | 1.058                                                                        | 1.046                                                                    | 1.018                                                                    |
| <i>R</i> factor ( <i>I</i> > 2σ( <i>I</i> ))                                | <i>R</i> <sub>1</sub> = 0.0590, <i>wR</i> <sub>2</sub> = 0.1404          | <i>R</i> <sub>1</sub> = 0.0836, <i>wR</i> <sub>2</sub> = 0.2347              | <i>R</i> <sub>1</sub> = 0.0399, <i>wR</i> <sub>2</sub> = 0.1072          | <i>R</i> <sub>1</sub> = 0.0895, <i>wR</i> <sub>2</sub> = 0.2353          |
| <i>R</i> factor (all data)                                                  | <i>R</i> <sub>1</sub> = 0.1159, <i>wR</i> <sub>2</sub> = 0.1615          | <i>R</i> <sub>1</sub> = 0.1079, <i>wR</i> <sub>2</sub> = 0.2493              | <i>R</i> <sub>1</sub> = 0.0513, <i>wR</i> <sub>2</sub> = 0.1137          | <i>R</i> <sub>1</sub> = 0.2227, <i>wR</i> <sub>2</sub> = 0.2957          |
| $\Delta\rho_{\text{max}} / \Delta\rho_{\text{min}}$ , e/Å <sup>-3</sup>     | 0.33/-0.2                                                                | 0.41/-0.25                                                                   | 0.15/-0.20                                                               | 1.06/-0.68                                                               |
| CCDC deposition number                                                      | 2340467                                                                  | 2336792                                                                      | 2331158                                                                  | 2340466                                                                  |

## Evaluation of antiviral activity.

**Table S3.** Cytotoxicity and antiviral activity of 2-arylimidazoles **3a-c**, **4a-e**, **5a,b**, **6a-e**, **8a,c**, **9a,b**, **10a-e**, **12** against the Vaccinia virus (Copenhagen strain) in Vero cell culture.

| No               | R <sup>1</sup>                   | R <sup>2</sup>                                                                       | CC <sub>50</sub> , µg/mL<br>(M±SD, n=3) | IC <sub>50</sub> (VACV), µg/mL<br>(M±SD, n=3) | SI     |
|------------------|----------------------------------|--------------------------------------------------------------------------------------|-----------------------------------------|-----------------------------------------------|--------|
| <b>4a</b>        | NO <sub>2</sub>                  | H                                                                                    | 42.9±14.6                               | 0.04±0.01                                     | 1072   |
| <b>4b</b>        | CN                               | H                                                                                    | 49.2±11.8                               | 0.14±0.04                                     | 351    |
| <b>4c</b>        | CF <sub>3</sub>                  | H                                                                                    | 15.0±2.8                                | 0.05±0.01                                     | 300    |
| <b>5a</b>        | NO <sub>2</sub>                  | H                                                                                    | 7.4±1.8                                 | 0.17±0.05                                     | 44     |
| <b>5b</b>        | CN                               | H                                                                                    | 20.4±4.9                                | 0.27±0.08                                     | 76     |
| <b>5c</b>        | CF <sub>3</sub>                  | H                                                                                    | 1.1±0,5                                 | 0.020±0.009                                   | 55     |
| <b>5d</b>        | N(CH <sub>3</sub> ) <sub>2</sub> | H                                                                                    | 77.5±17.6                               | 3.35±0.74                                     | 23     |
| <b>5e</b>        | OCH <sub>3</sub>                 | H                                                                                    | 151.3±36.1                              | 4.41±0.67                                     | 34     |
| <b>6a</b>        | NO <sub>2</sub>                  | CH <sub>3</sub>                                                                      | 364.0±85.9                              | 1.25±0.07                                     | 291    |
| <b>6b</b>        | CN                               | CH <sub>3</sub>                                                                      | 223.7±28.9                              | 8.42±2.10                                     | 27     |
| <b>7a</b>        | NO <sub>2</sub>                  | CH <sub>3</sub>                                                                      | 122.1±28.1                              | 1.31±0.03                                     | 93     |
| <b>7b</b>        | CN                               | CH <sub>3</sub>                                                                      | 270.0±71.8                              | 58.21±12.22                                   | <8     |
| <b>7c</b>        | CF <sub>3</sub>                  | CH <sub>3</sub>                                                                      | 52.5±10.5                               | 1.76±0.53                                     | 30     |
| <b>7d</b>        | N(CH <sub>3</sub> ) <sub>2</sub> | CH <sub>3</sub>                                                                      | 53.9±13.5                               | 16.97±4.00                                    | <8     |
| <b>7e</b>        | OCH <sub>3</sub>                 | CH <sub>3</sub>                                                                      | 92.9±23.5                               | 53.97±7.94                                    | <8     |
| <b>9a</b>        | NO <sub>2</sub>                  | –                                                                                    | 769.7±192.4                             | 57.83±13.30                                   | 13     |
| <b>9c</b>        | CF <sub>3</sub>                  | –                                                                                    | 704.0±176.0                             | 4.82±1.40                                     | 146    |
| <b>10a</b>       | NO <sub>2</sub>                  | –                                                                                    | 820.0±180.4                             | N/A                                           | –      |
| <b>10b</b>       | CN                               | –                                                                                    | 385.0±88.6                              | N/A                                           | –      |
| <b>11a</b>       | NO <sub>2</sub>                  | CH <sub>2</sub> C <sub>6</sub> H <sub>5</sub>                                        | 455.0±70.5                              | 2.50±0.62                                     | 182    |
| <b>11b</b>       | NO <sub>2</sub>                  | CH <sub>2</sub> (2-BrC <sub>6</sub> H <sub>4</sub> )                                 | 47.1±8.8                                | 1.37±0.37                                     | 34     |
| <b>11c</b>       | NO <sub>2</sub>                  | CH <sub>2</sub> (3,4-Cl <sub>2</sub> C <sub>6</sub> H <sub>3</sub> )                 | 50.0±17.1                               | 0.28±0.14                                     | 179    |
| <b>11d</b>       | NO <sub>2</sub>                  | CH <sub>2</sub> (2,6-F <sub>2</sub> C <sub>6</sub> H <sub>3</sub> )                  | 22.1±4.4                                | 0.52±0.32                                     | 43     |
| <b>11e</b>       | NO <sub>2</sub>                  | CH <sub>2</sub> (2,5-(CH <sub>3</sub> ) <sub>2</sub> C <sub>6</sub> H <sub>3</sub> ) | 44.0±9.3                                | 0.56±0.18                                     | 79     |
| <b>13</b>        | NO <sub>2</sub>                  | -                                                                                    | 140.7±38.0                              | 10.83±1.21                                    | 13     |
| <b>Cidofovir</b> |                                  |                                                                                      | 276.2±45.6                              | 9.07±0.63                                     | 34     |
| <b>NIOCH-14</b>  |                                  |                                                                                      | 470.6±90.2                              | 0.003±0.001                                   | 157026 |

Notes: CC<sub>50</sub> – 50% cytotoxicity concentration, at which 50% of cells in uninfected monolayers are destroyed; IC<sub>50</sub> – 50% virus inhibitory concentration, at which 50% of cells in infected monolayers are preserved; SI – selectivity index, ratio CC<sub>50</sub>/IC<sub>50</sub>; M – mean value; SD – standard deviation; n=3 – the number of repeats of measurement of CC<sub>50</sub> and IC<sub>50</sub>; N/A – not active.



**Table S4.** Cytotoxicity and antiviral activity of 2-arylimidazoles **4a-c**, **5a**, **6a**, **7a**, **11a-c**, against the cowpox virus (Grishak strain) and the ectromelia virus (K-1 strain) in Vero cell culture.

| <b>№</b>         | <b>CC<sub>50</sub>, µg/mL<br/>(M±SD, n=3)</b> | <b>IC<sub>50</sub>(CPXV),<br/>µg/mL<br/>(M±SD, n=3)</b> | <b>SI (CPXV)</b> | <b>IC<sub>50</sub>(ECTV),<br/>µg/mL<br/>(M±SD, n=3)</b> | <b>SI (ECTV)</b> |
|------------------|-----------------------------------------------|---------------------------------------------------------|------------------|---------------------------------------------------------|------------------|
| <b>4a</b>        | 42.9±14.6                                     | 0.35±0.11                                               | 123              | 0.12±0.05                                               | 358              |
| <b>4b</b>        | 49.2±11.8                                     | 4.82±1.20                                               | 10               | 0.70±0.24                                               | 70               |
| <b>4c</b>        | 15.0±2.8                                      | 0.78±0.09                                               | 19               | 0.16±0.01                                               | 94               |
| <b>5a</b>        | 7.4±1.8                                       | 1.54±0.37                                               | <8               | 0.34±0.1                                                | 22               |
| <b>6a</b>        | 364.0±85.9                                    | 5.65±1.54                                               | 65               | 3.95±0.18                                               | 92               |
| <b>7a</b>        | 122.1±28.1                                    | 6.13±1.35                                               | 20               | 3.82±0.31                                               | 32               |
| <b>11a</b>       | 455.0±70.5                                    | 30.6±7.65                                               | 15               | 12.08±1.03                                              | 38               |
| <b>11b</b>       | 47.1±8.8                                      | 13.67±1.41                                              | <8               | 13.51±1.32                                              | <8               |
| <b>11c</b>       | 50.0±17.1                                     | 3.24±0.71                                               | 15               | 0.83±0.27                                               | 60               |
| <b>11d</b>       | 22.1±4.4                                      | 3.16±0.70                                               | <8               | 1.92±0.57                                               | 12               |
| <b>11e</b>       | 44.0±9.3                                      | 13.56±0.94                                              | <8               | 6.05±2.08                                               | <8               |
| <b>Cidofovir</b> | 276.2±45.6                                    | 13.47±1.24                                              | 23               | 11.01±0.90                                              | 28               |
| <b>NIOCH-14</b>  | 470.6±90.2                                    | 0.004±0.002                                             | 132600           | 0.003±0.001                                             | 149175           |

Notes: CC<sub>50</sub> – 50% cytotoxicity concentration, at which 50% of cells in uninfected monolayers are destroyed; IC<sub>50</sub> – 50% virus inhibitory concentration, at which 50% of cells in infected monolayers are preserved; SI – selectivity index, ratio CC<sub>50</sub>/IC<sub>50</sub>; M – mean value; SD – standard deviation; n=3 – the number of repeats of measurement of CC<sub>50</sub> and IC<sub>50</sub>.

**Table S5.** Cytotoxicity and antiviral activity of 2-arylimidazoles **4a-c** and **6a** against the Variola virus (India3a strain) in Vero cell culture.

| <b>No</b>        | <b>CC<sub>50</sub>, µg/mL<br/>(M±SD, n=3)</b> | <b>IC<sub>50</sub>(VARV), µg/mL<br/>(M±SD, n=3)</b> | <b>SI (VARV)</b> |
|------------------|-----------------------------------------------|-----------------------------------------------------|------------------|
| <b>4a</b>        | 42.9±14.6                                     | 0.115±0.033                                         | 374              |
| <b>4b</b>        | 49.2±11.8                                     | 0.409±0.042                                         | 120              |
| <b>4c</b>        | 15.0±2.8                                      | 0.06±0.01                                           | 257              |
| <b>6a</b>        | 364.0±85.9                                    | 1.251±0.080                                         | 291              |
| <b>Cidofovir</b> | 276.2±45.6                                    | 12.05±1.53                                          | 26               |
| <b>NIOCH-14</b>  | 470.6±90.2                                    | 0.003±0.001                                         | 149175           |

Notes: CC<sub>50</sub> – 50% cytotoxicity concentration, at which 50% of cells in uninfected monolayers are destroyed; IC<sub>50</sub> – 50% virus inhibitory concentration, at which 50% of cells in infected monolayers are preserved; SI – selectivity index, ratio CC<sub>50</sub>/IC<sub>50</sub>; M – mean value; SD – standard deviation; n=3 – the number of repeats of measurement of CC<sub>50</sub> and IC<sub>50</sub>.

Copies of  $^1\text{H}$  and  $^{13}\text{C}$  NMR, HSQC, HMBC spectra, HRMS (ESI) and HRMS (EI) for 4a-c, 5a-e, 6a-b, 7a-e, 8a-c, 9a, 9c, 10a-b, 11a-e, 12 and 13.

3-hydroxy-6,6-dimethyl-2-(4-nitrophenyl)-3,5,6,7-tetrahydro-4H-benzimidazol-4-one (4a).

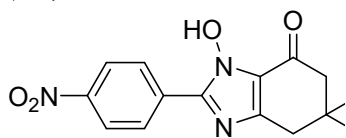

4a

$^1\text{H}$  NMR spectrum in DMSO- $d_6$ :

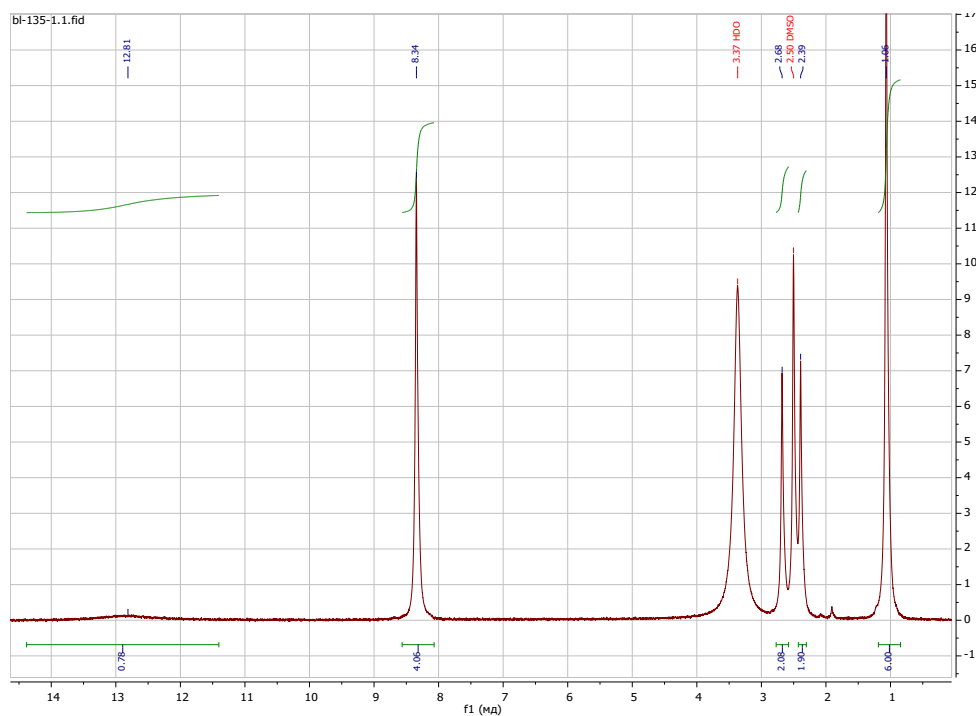

$^{13}\text{C}$  NMR spectrum in DMSO- $d_6$ :

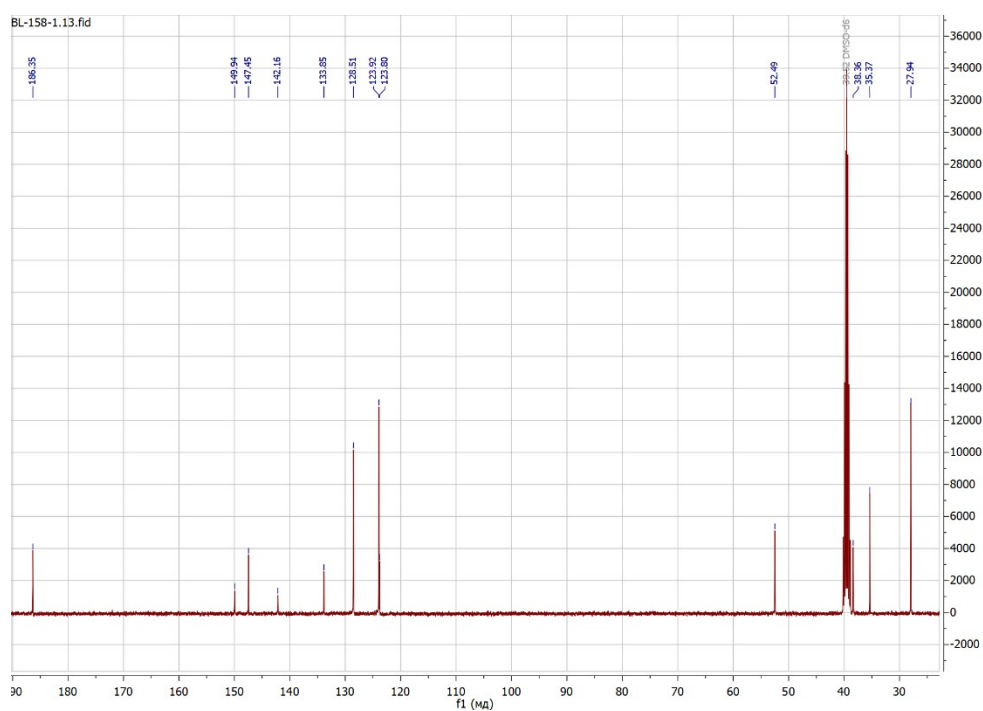

HSQC in DMSO-d<sub>6</sub>:

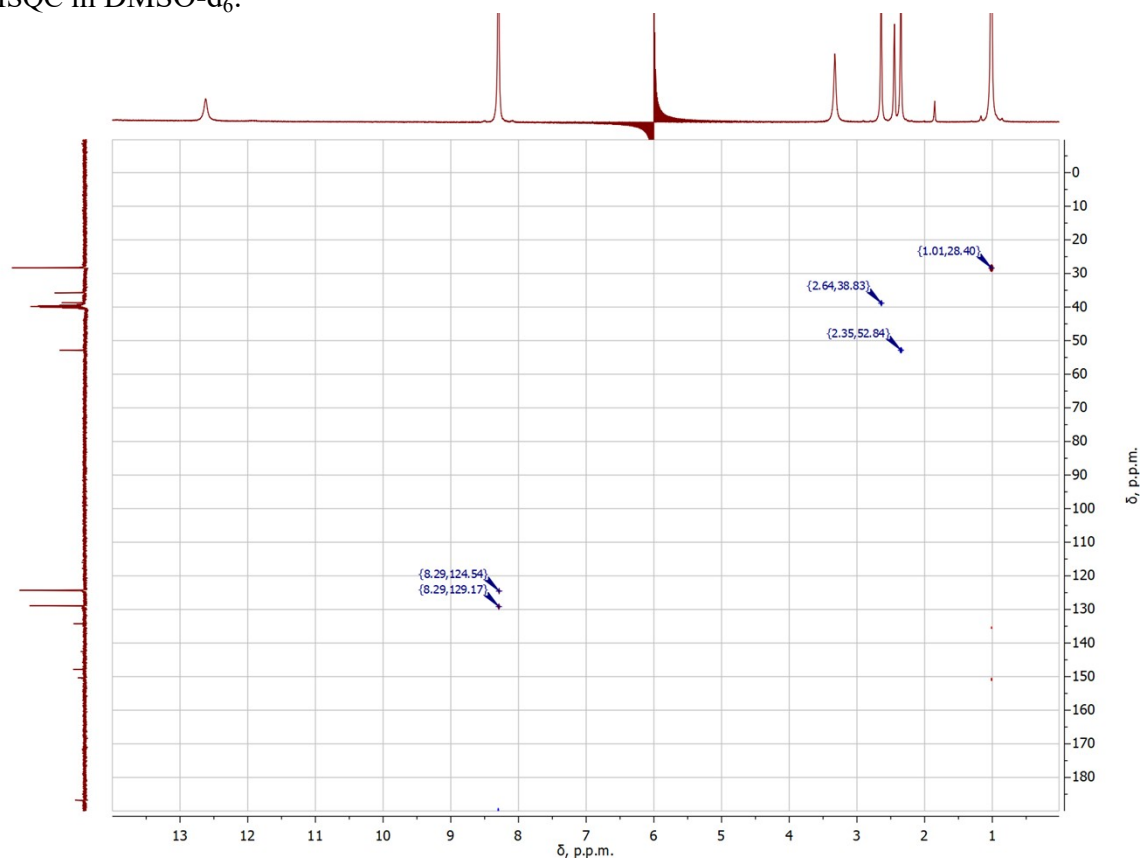

HMBC in DMSO-d<sub>6</sub>:

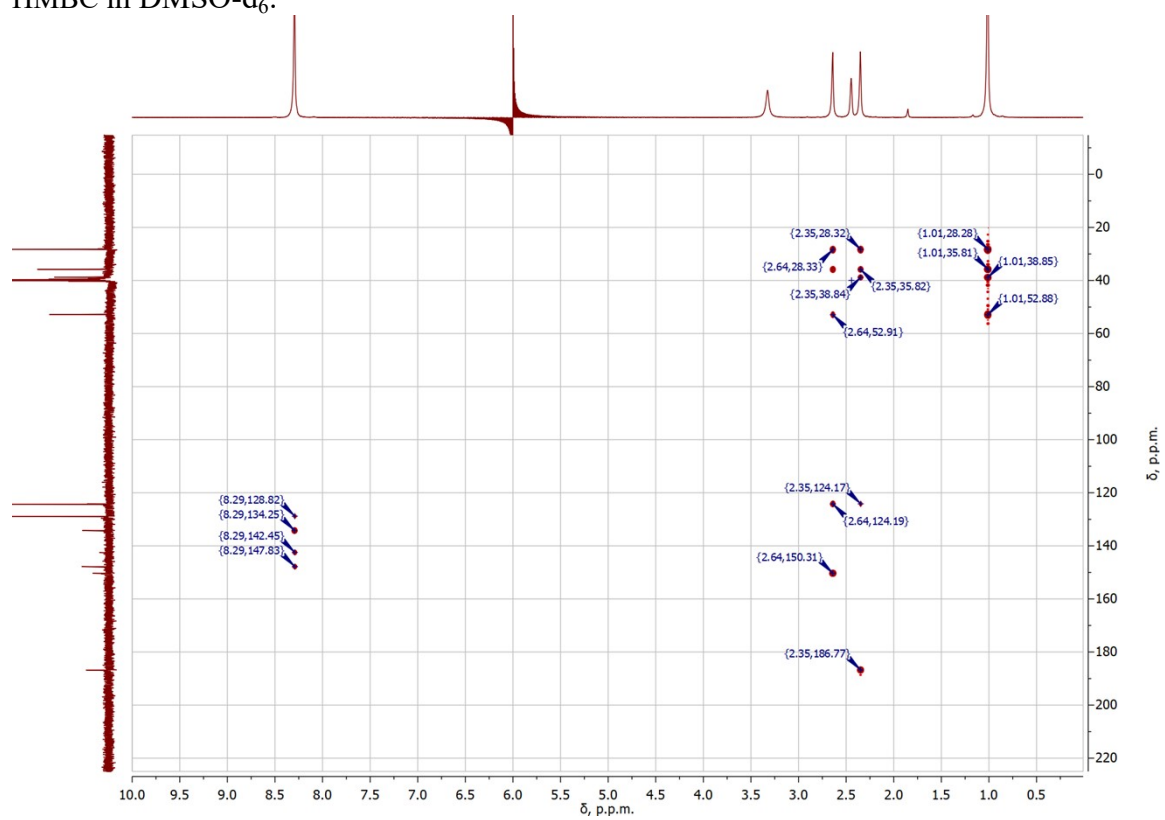

# HRMS (ESI):

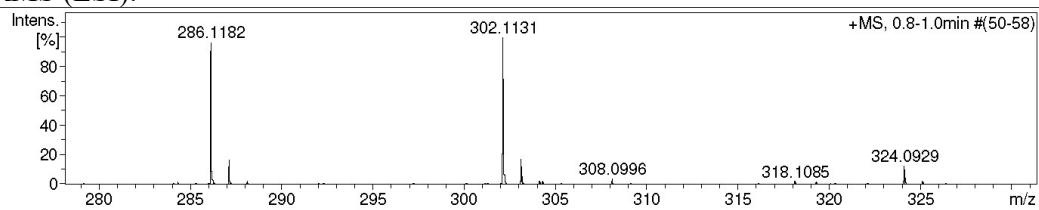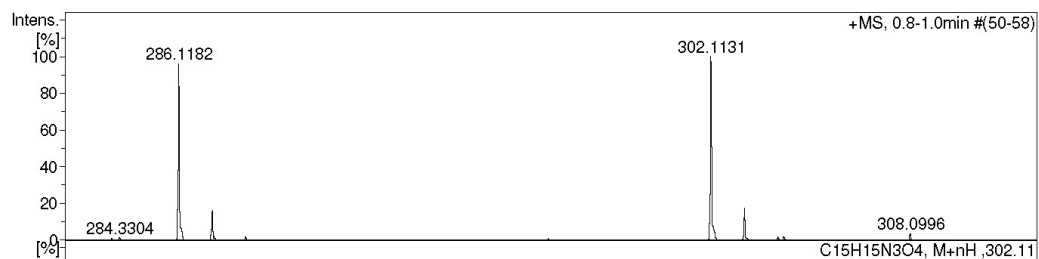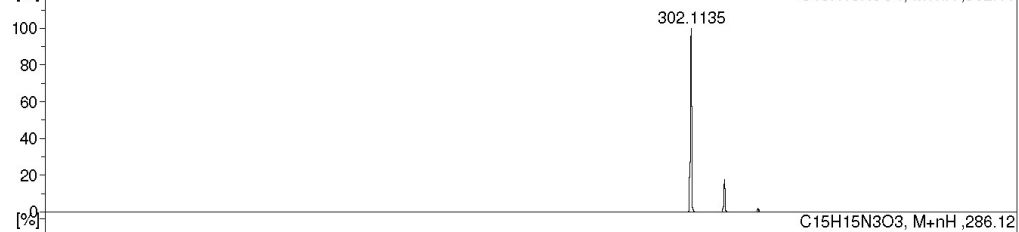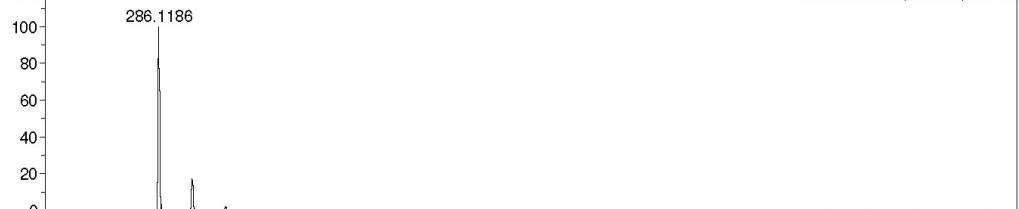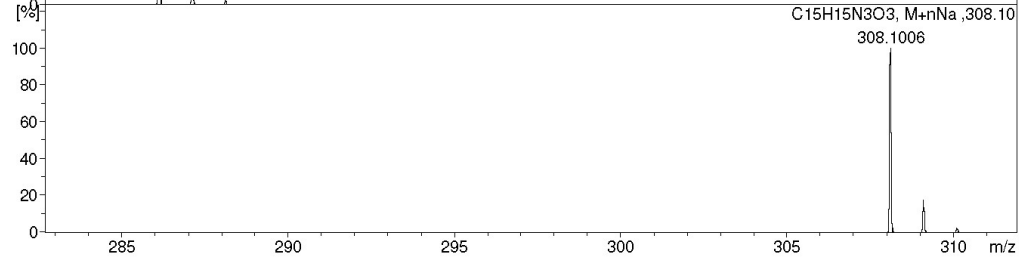

4-(1-hydroxy-5,5-dimethyl-7-oxo-4,5,6,7-tetrahydro-1H-benzo[d]imidazol-2-yl)benzonitrile (**4b**)

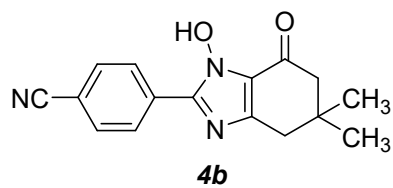

$^1\text{H}$  NMR spectrum in  $\text{DMSO-}d_6$ :

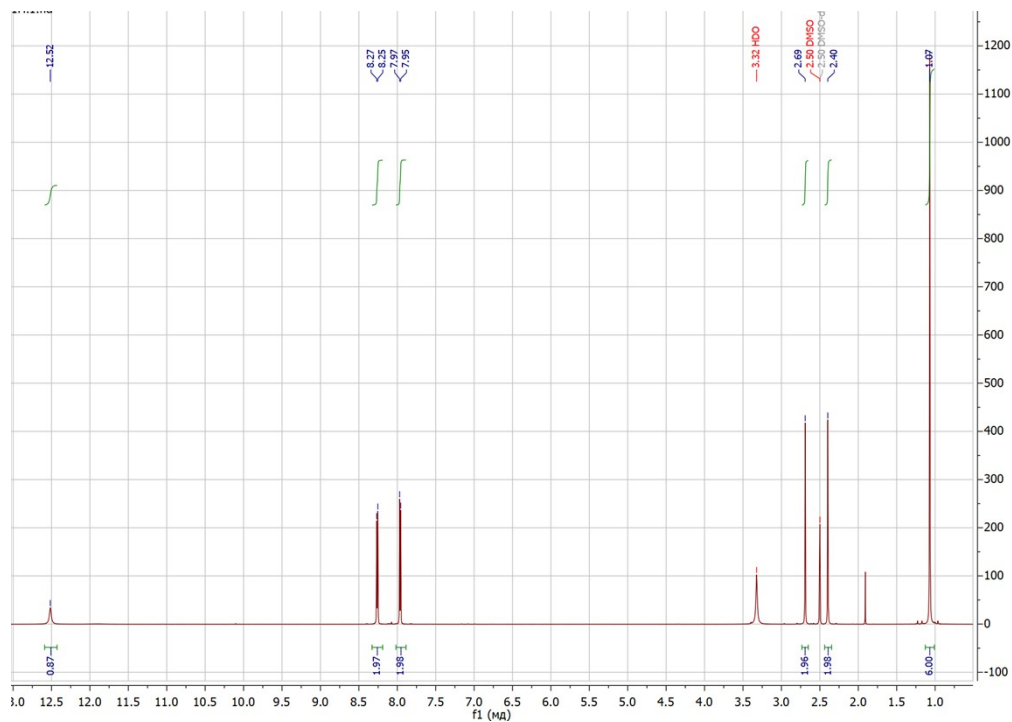

$^1\text{H}$  NMR spectrum in  $\text{CDCl}_3$ :

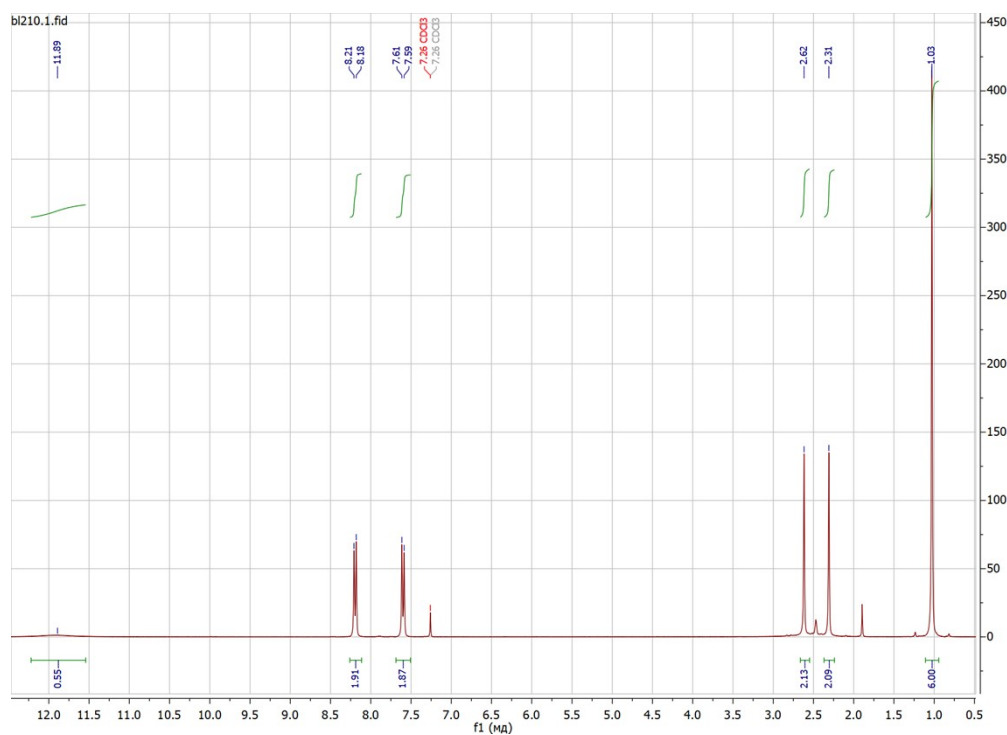

### <sup>13</sup>C NMR spectrum in DMSO-d<sub>6</sub>:

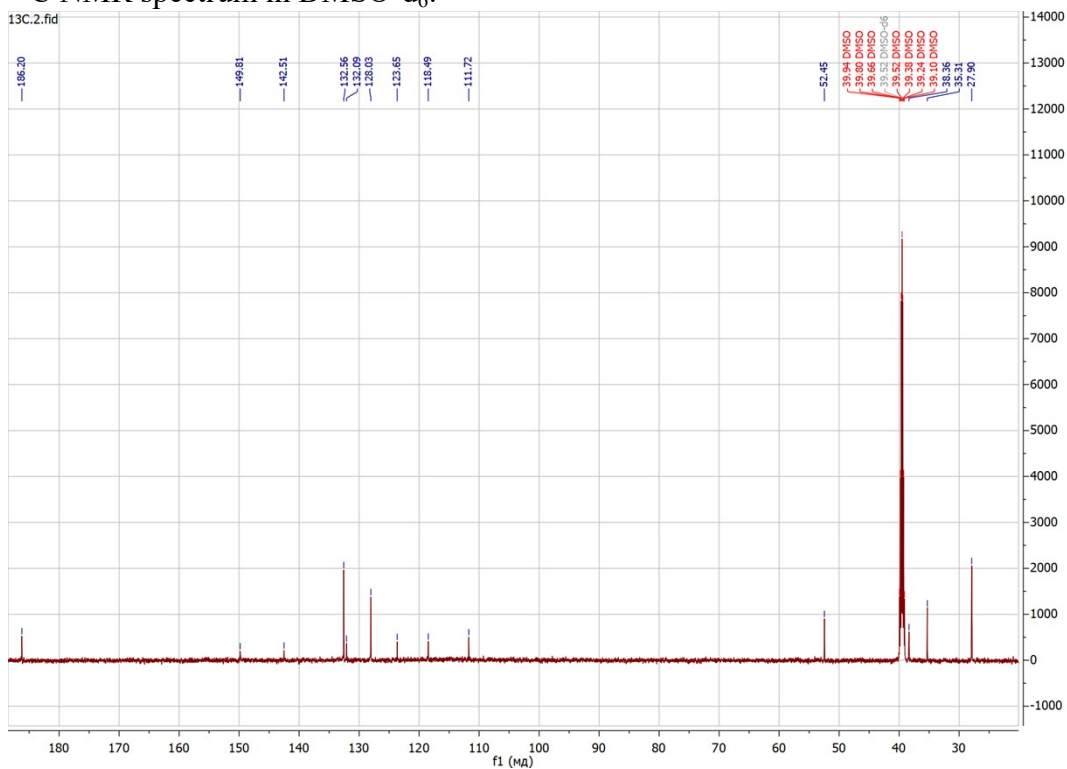

### HRMS (EI):

PANI-164 #4 RT: 0.22 AV: 1 NL: 4.43E6  
T: + c EI Full ms [ 14.50-320.50]

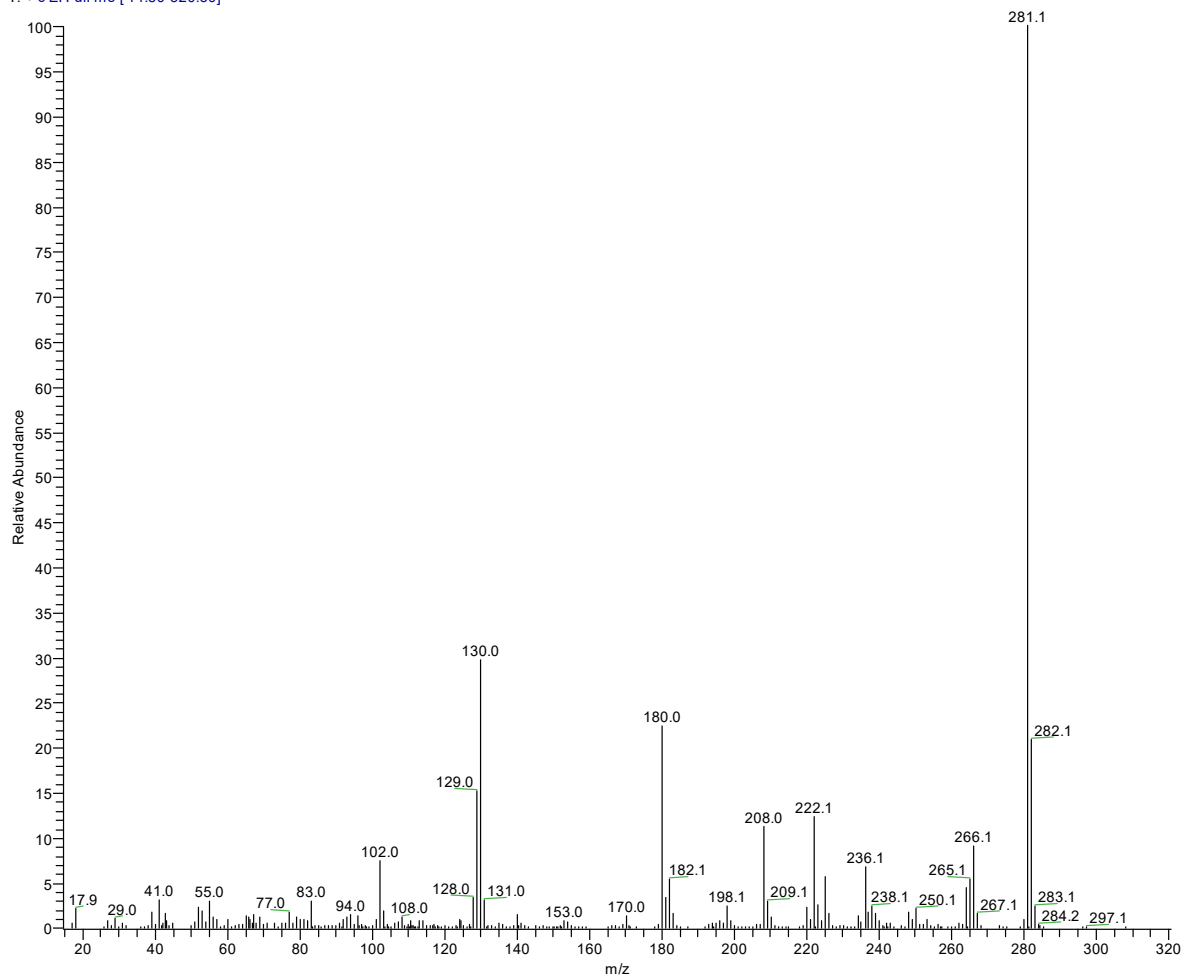

3-Hydroxy-6,6-dimethyl-2-(4-(trifluoromethyl)phenyl)-3,5,6,7-tetrahydro-4H-benzo[d]imidazol-4-one (**4c**)

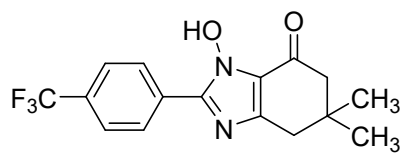

**4c**

$^1\text{H}$  NMR spectrum in  $\text{DMSO-d}_6$ :

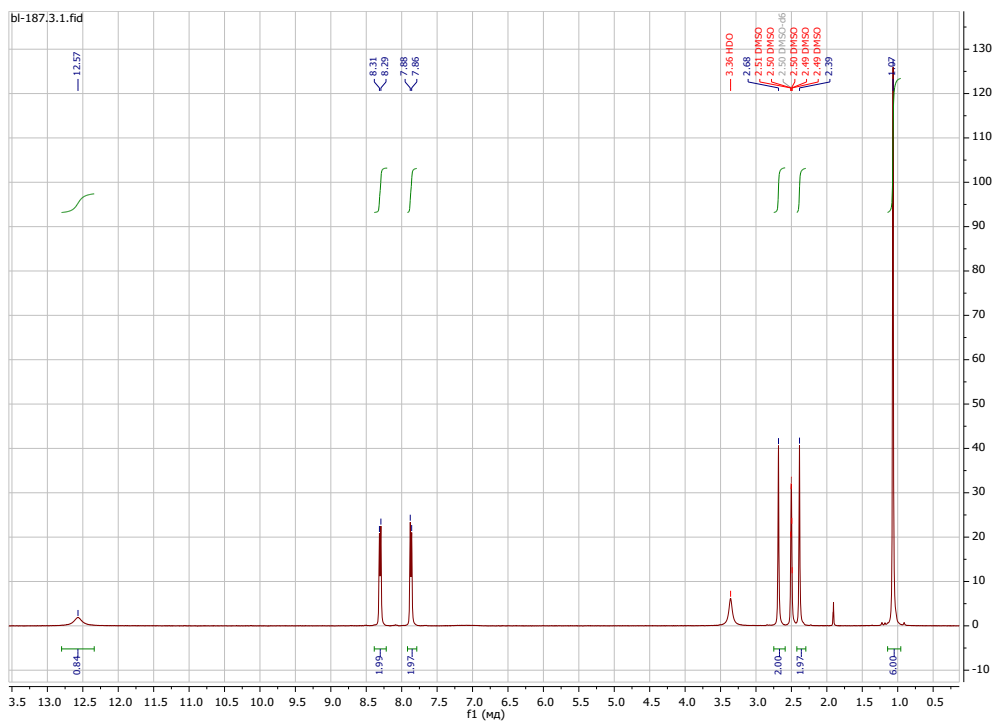

$^{13}\text{C}$  NMR spectrum in  $\text{DMSO-d}_6$ :

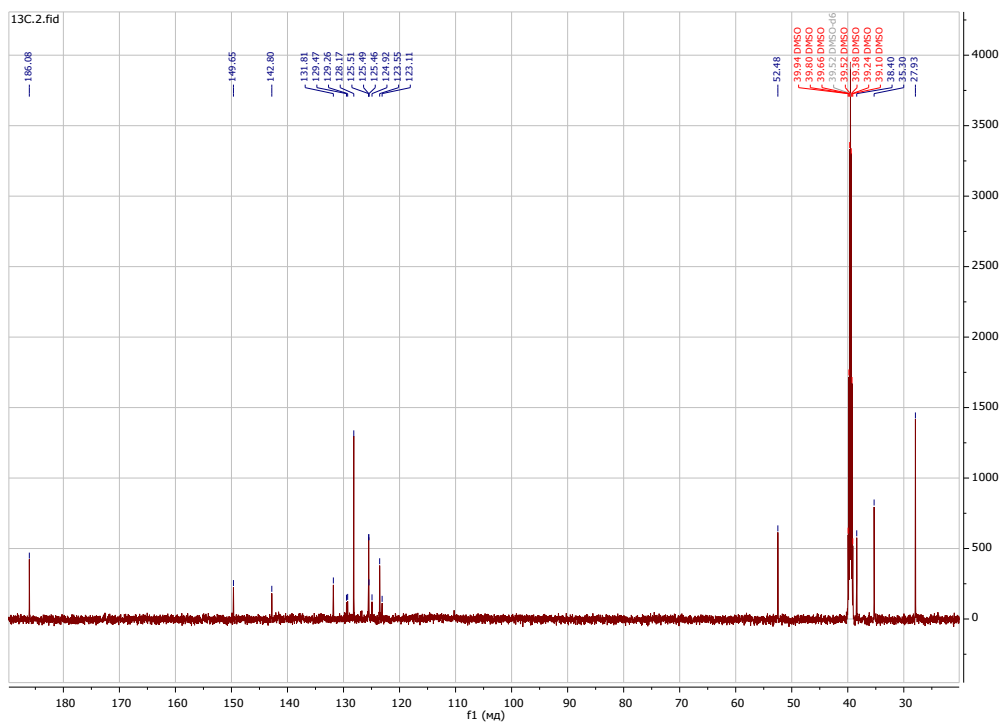



# HRMS (EI):

PANI-152\_230804151708 #4 RT: 0.22 AV: 1 NL: 5.93E5  
T: + c EI Full ms [ 14.50-350.50]

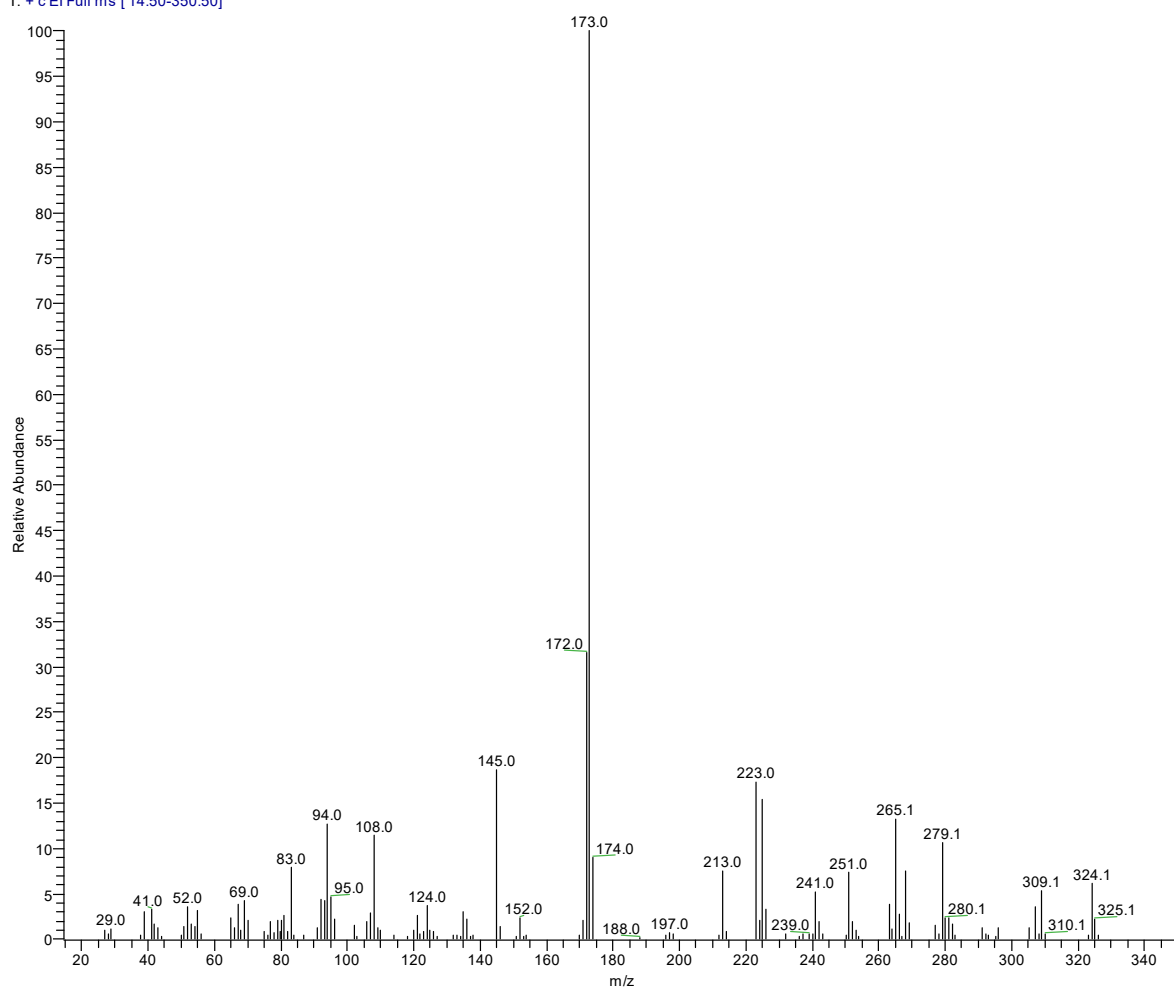

*1-[1-Hydroxy-4-methyl-2-(4-nitrophenyl)-1H-imidazol-5-yl]ethanone (5a).*

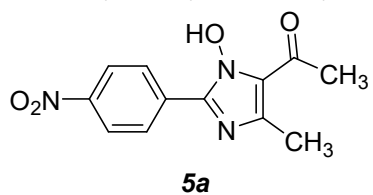

$^1\text{H}$  NMR spectrum in  $\text{DMSO-d}_6$ :

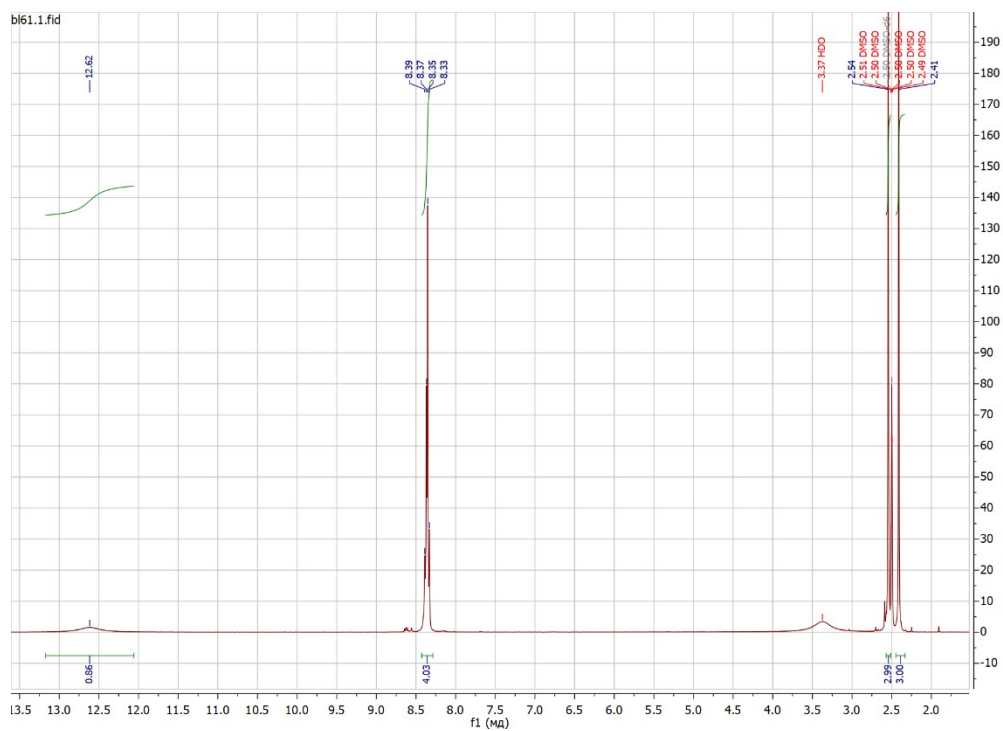

$^{13}\text{C}$  NMR spectrum in  $\text{DMSO-d}_6$ :

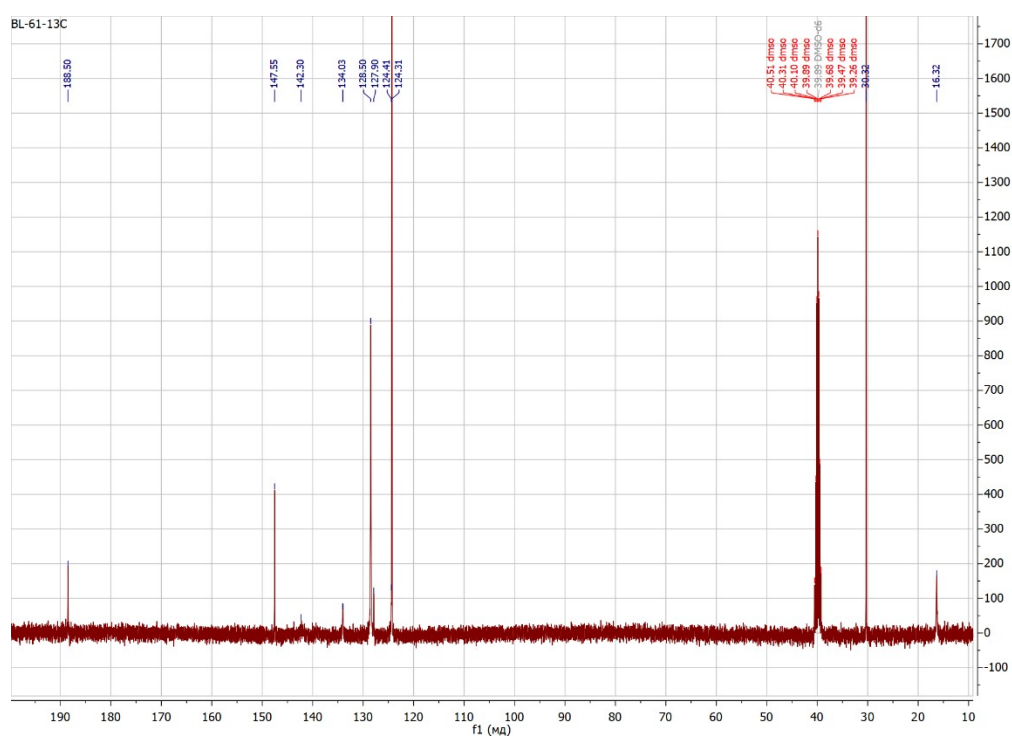

HMBC in DMSO-d<sub>6</sub>:

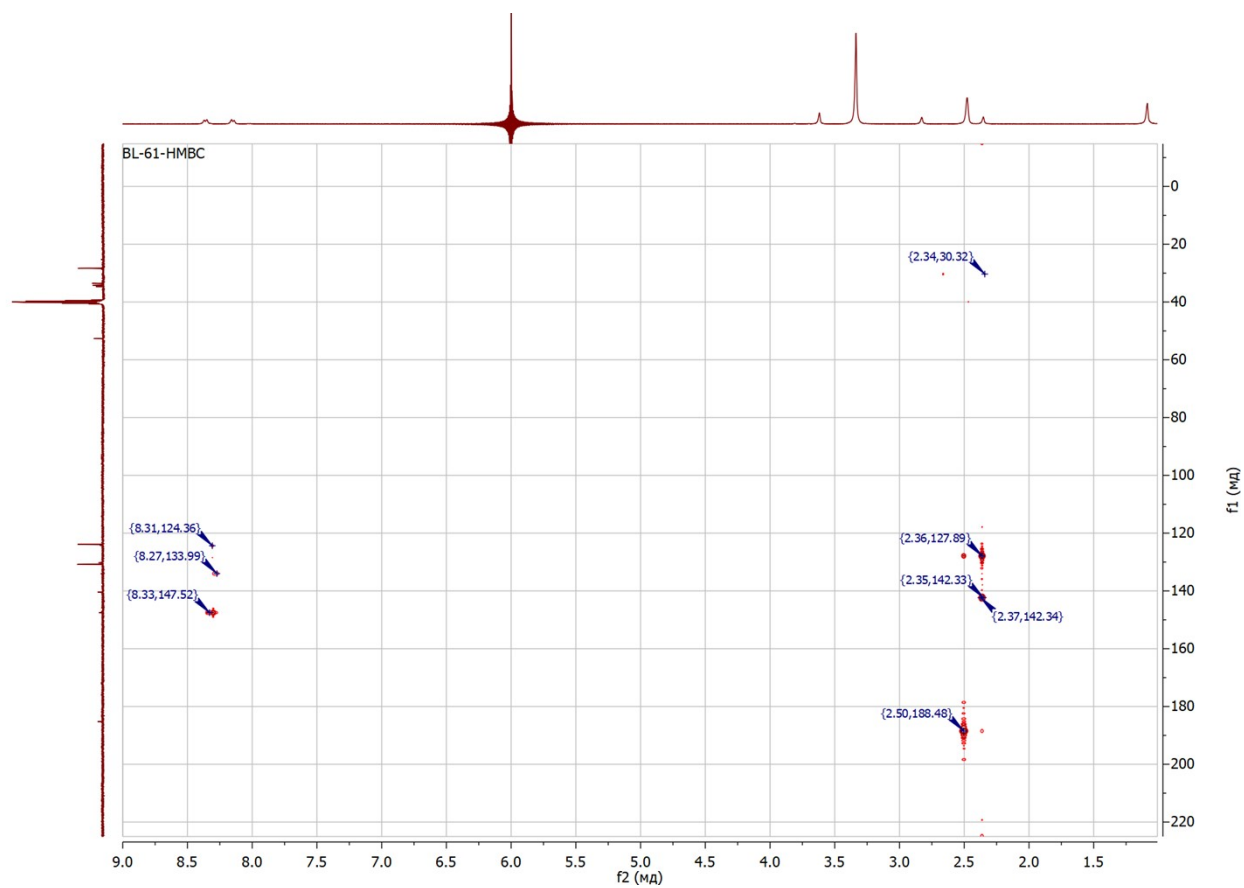

HSQC in DMSO-d<sub>6</sub>:

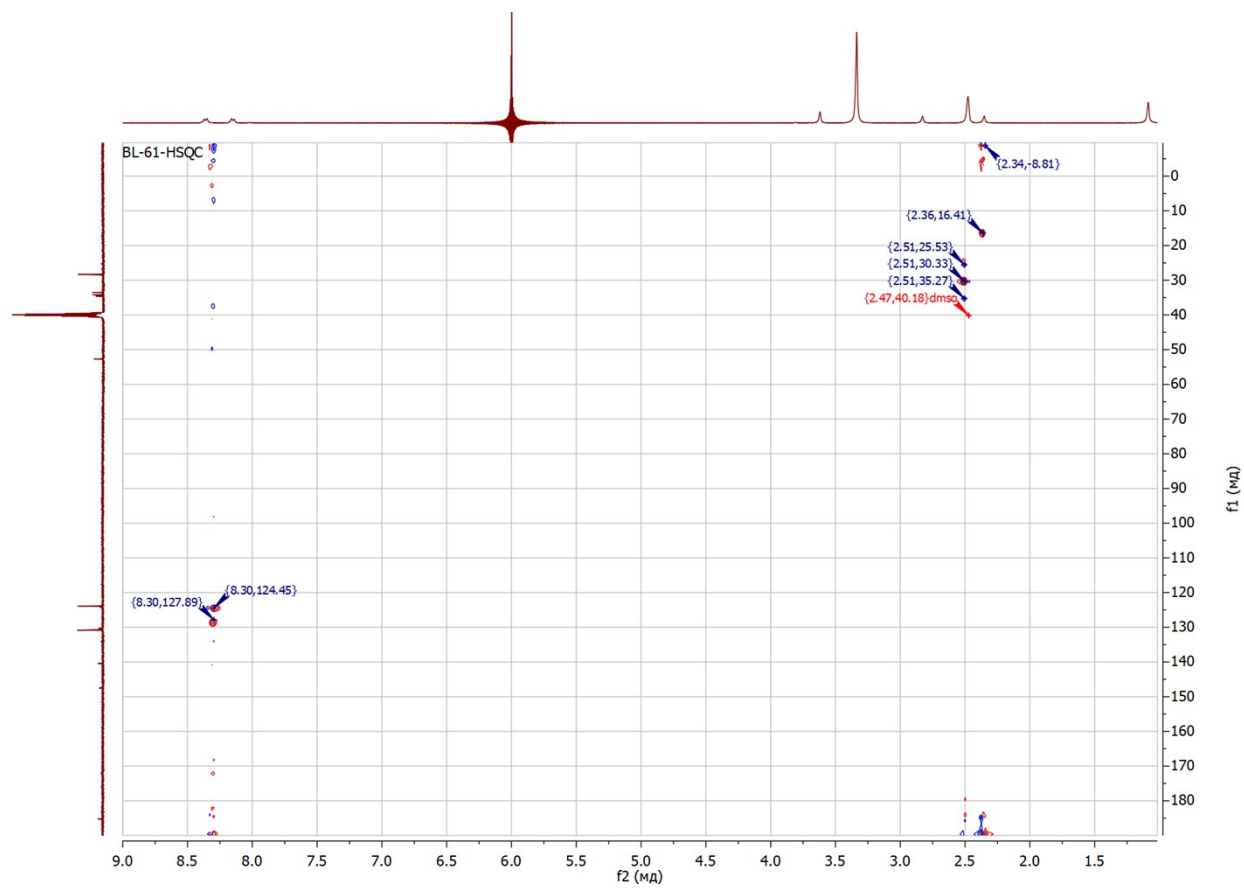

# HRMS (EI):

PANI-72 #7 RT: 0.28 AV: 1 NL: 1.38E5  
T: + c EI Full ms [ 32.50-280.50]

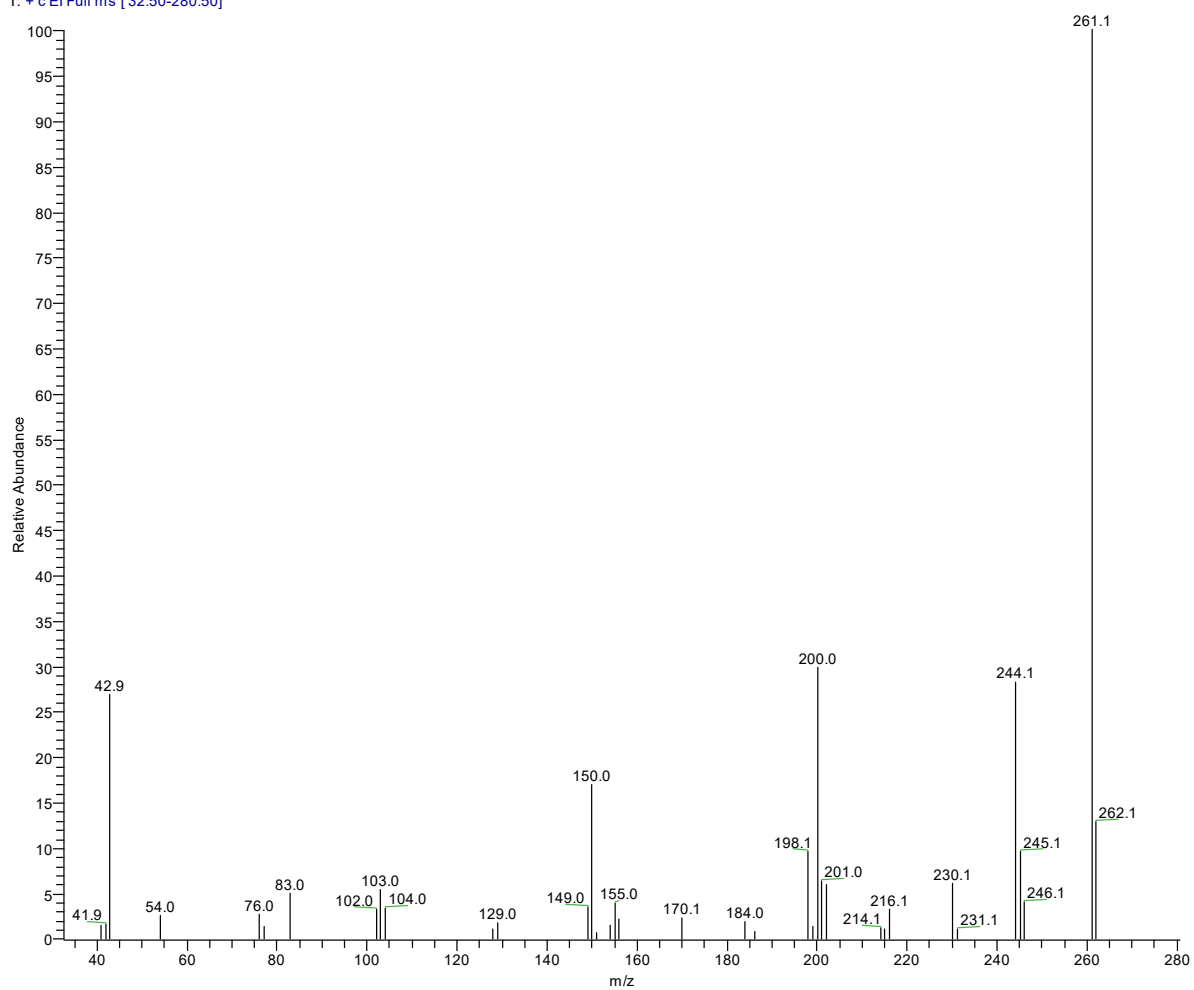

4-(5-Acetyl-1-hydroxy-4-methyl-1H-imidazol-2-yl)benzonitrile (**5b**)

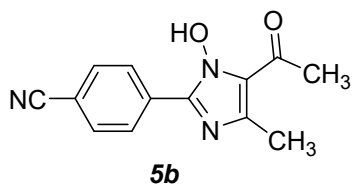

$^1\text{H}$  NMR spectrum in  $\text{DMSO-d}_6$ :

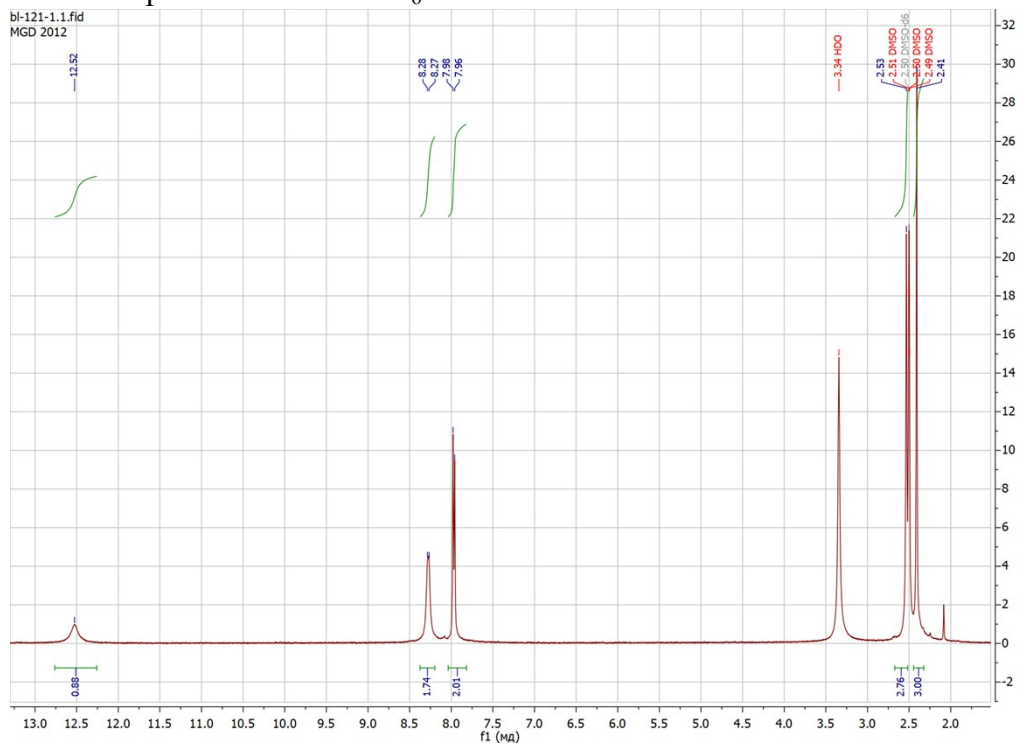

$^{13}\text{C}$  NMR spectrum in  $\text{DMSO-d}_6$ :

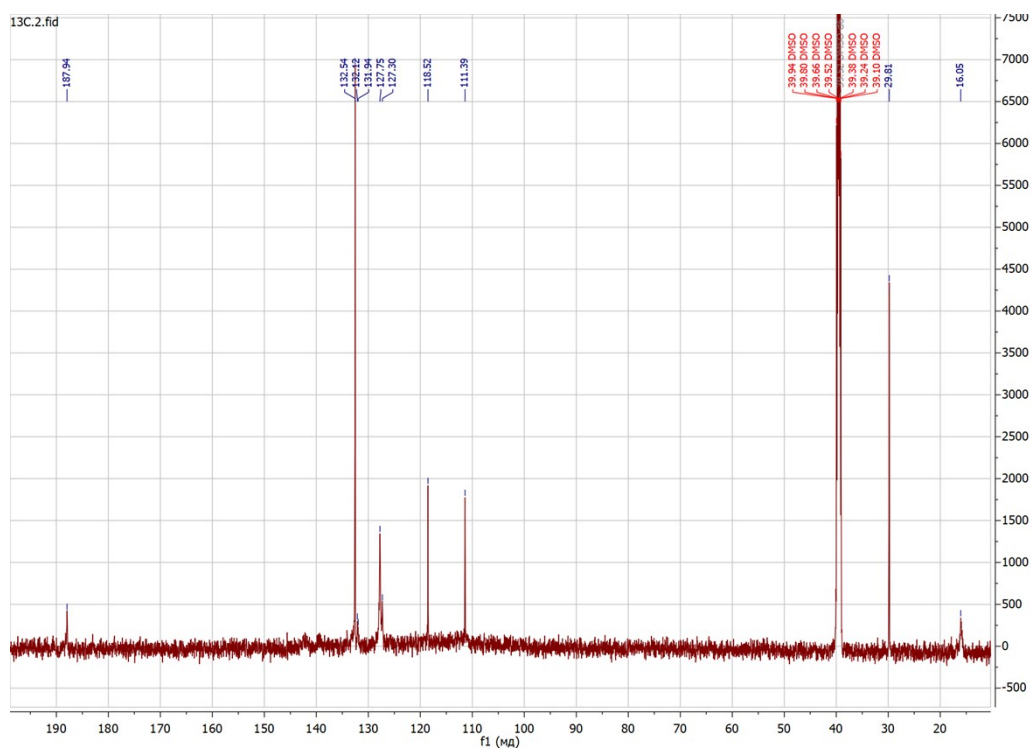

# HRMS (EI):

PANI-116\_230807133817 #2 RT: 0.06 AV: 1 NL: 1.15E5  
T: + c EI Full ms [ 32.50-300.50]

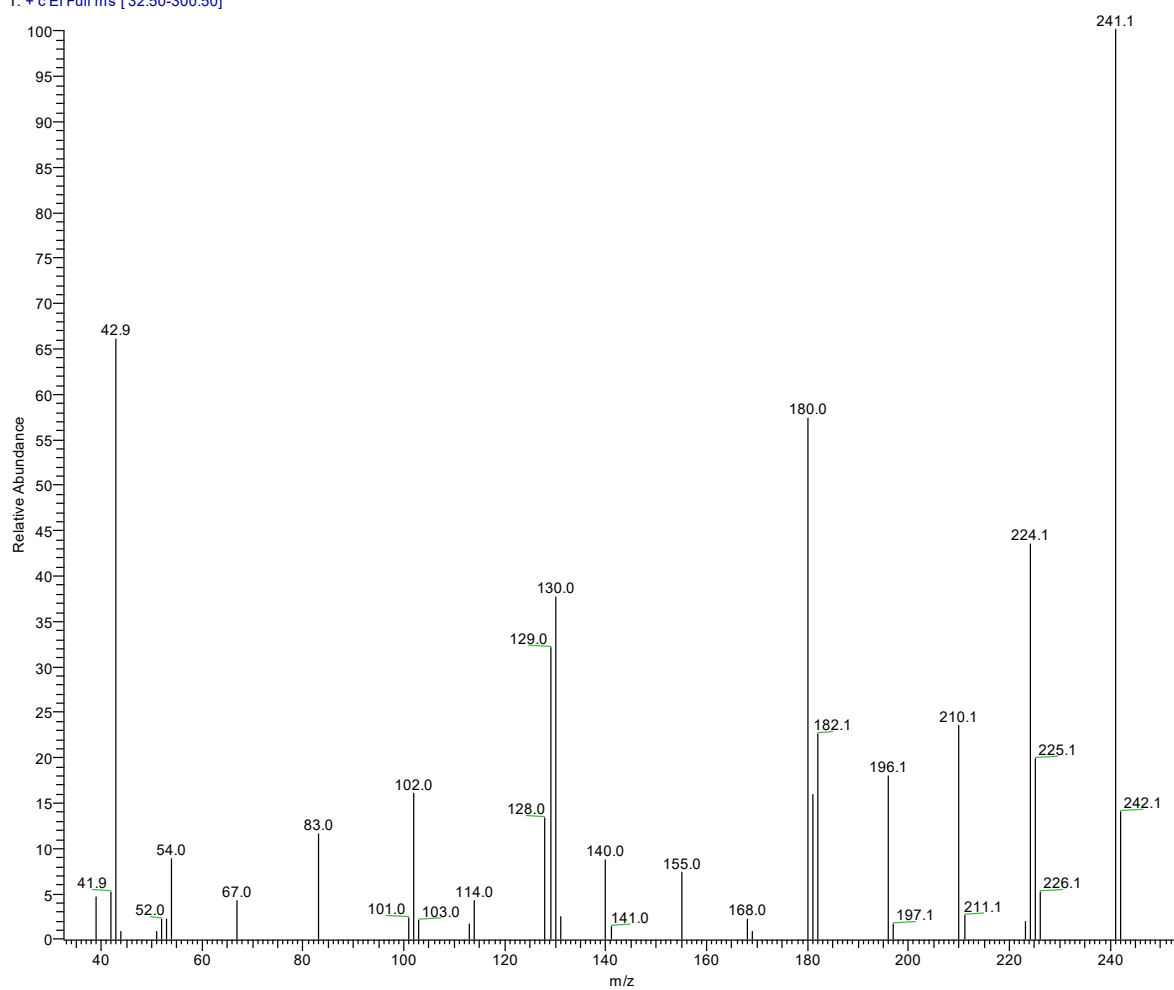

*1-(1-Hydroxy-4-methyl-2-(4-(trifluoromethyl)phenyl)-1H-imidazol-5-yl)ethan-1-one (5c)*

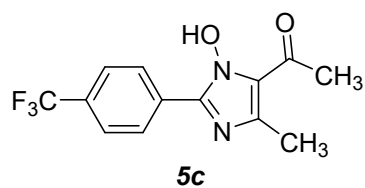

$^1\text{H}$  NMR spectrum in  $\text{DMSO-d}_6$ :

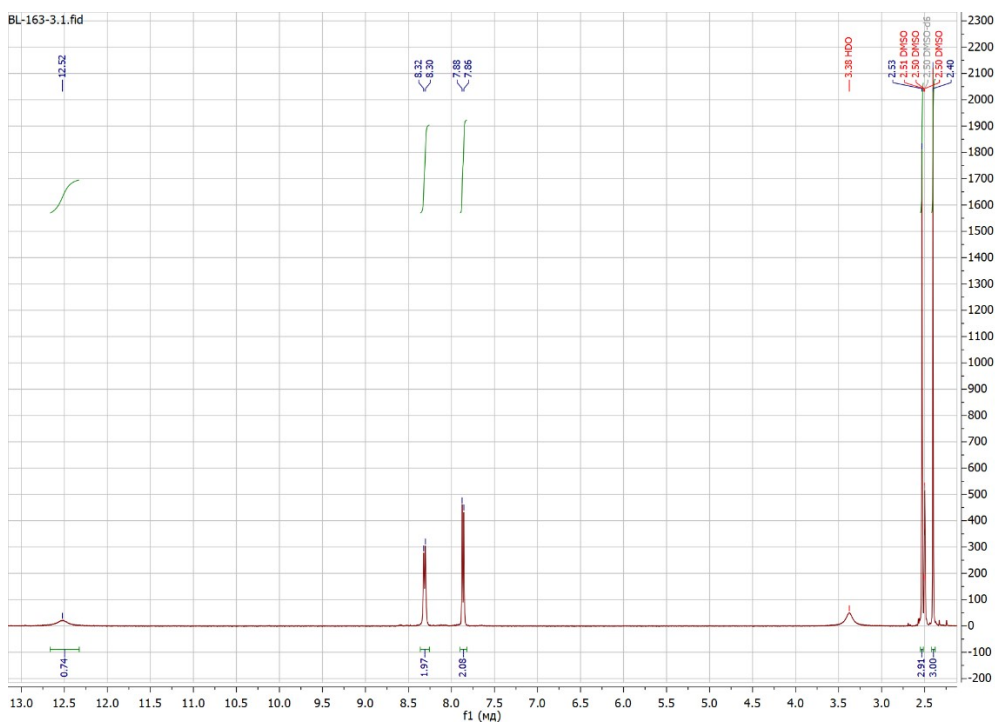

$^1\text{H}$  NMR spectrum in  $\text{CDCl}_3$ :

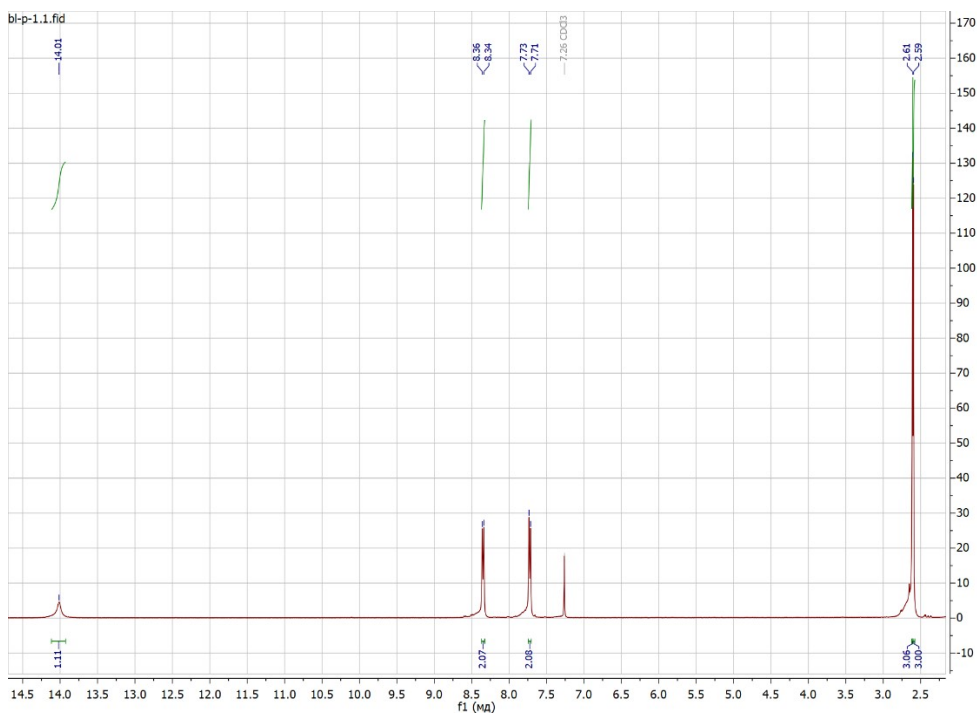

### $^{13}\text{C}$ NMR spectrum in $\text{DMSO-d}_6$ :

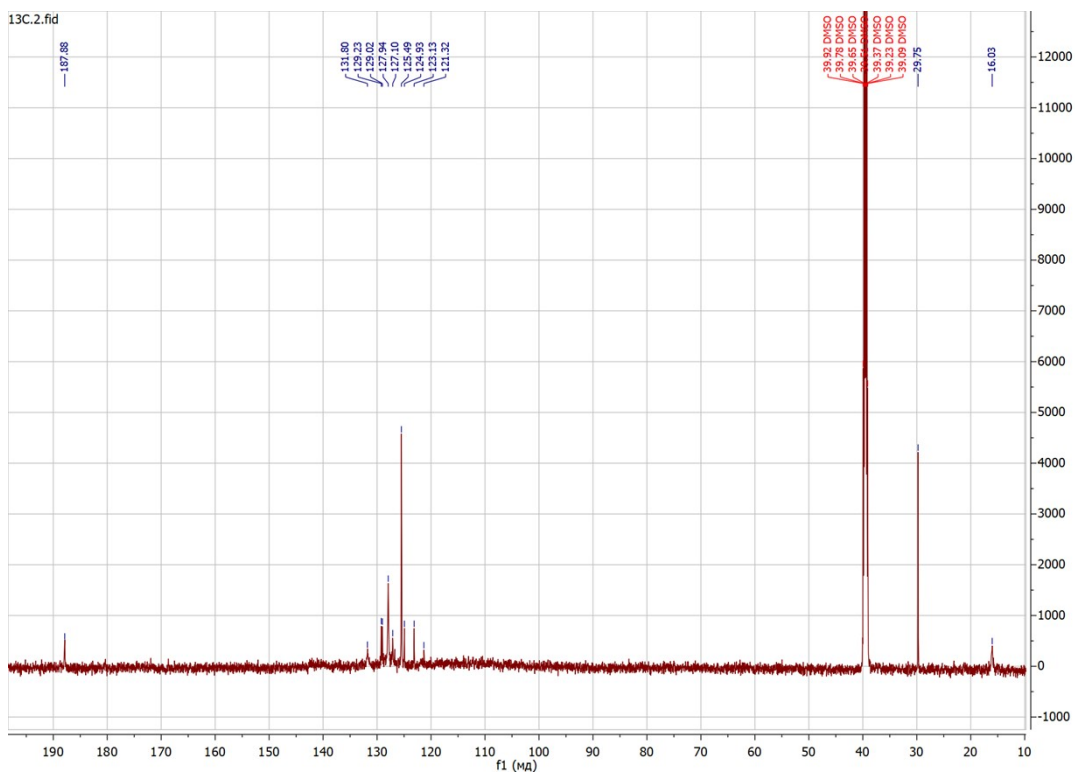

### HRMS (EI):

PANI-114 #6 RT: 0.36 AV: 1 NL: 7.74E5  
T: +c EI Full ms [ 14.50-320.50]

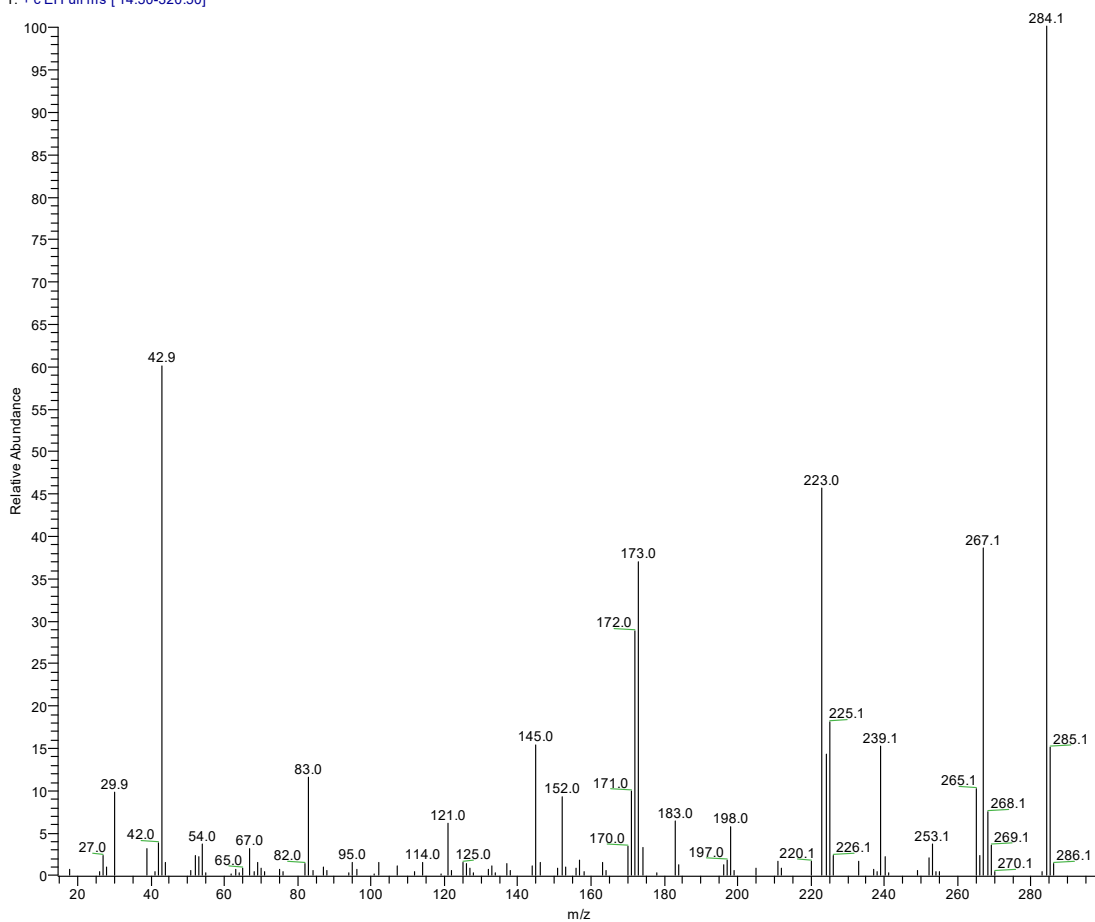



*1-(2-(4-(Dimethylamino)phenyl)-1-hydroxy-4-methyl-1H-imidazol-5-yl)ethan-1-one (5d)*

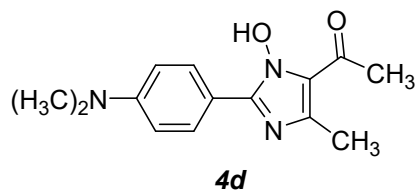

<sup>1</sup>H NMR spectrum in DMSO-d<sub>6</sub>:

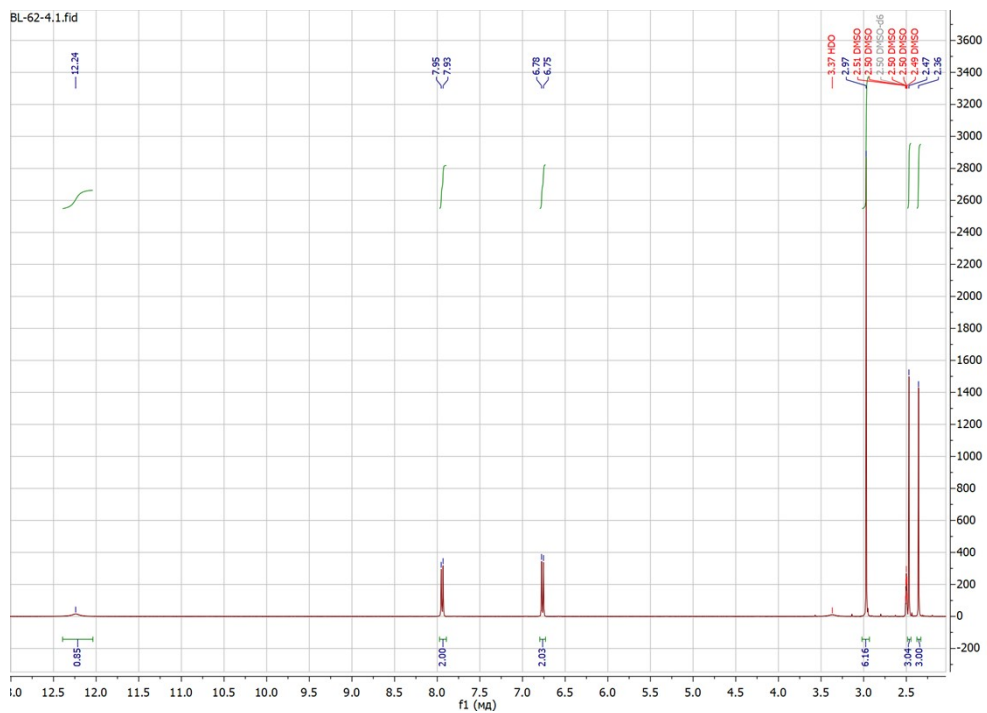

<sup>1</sup>H NMR spectrum in CDCl<sub>3</sub>:

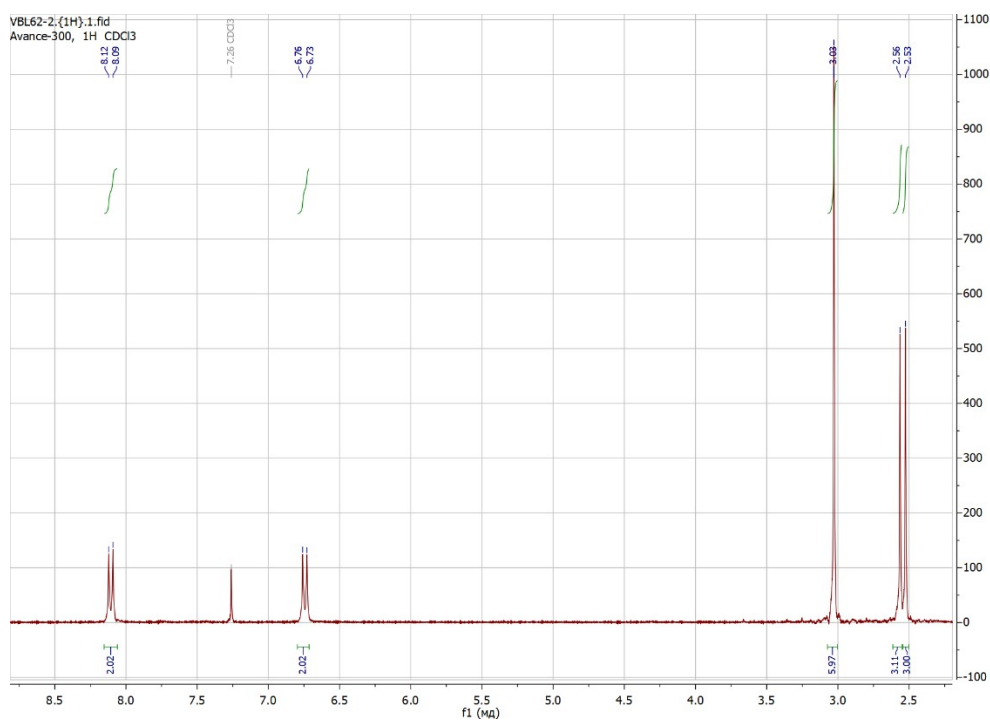

### $^{13}\text{C}$ NMR spectrum in $\text{DMSO-d}_6$ :

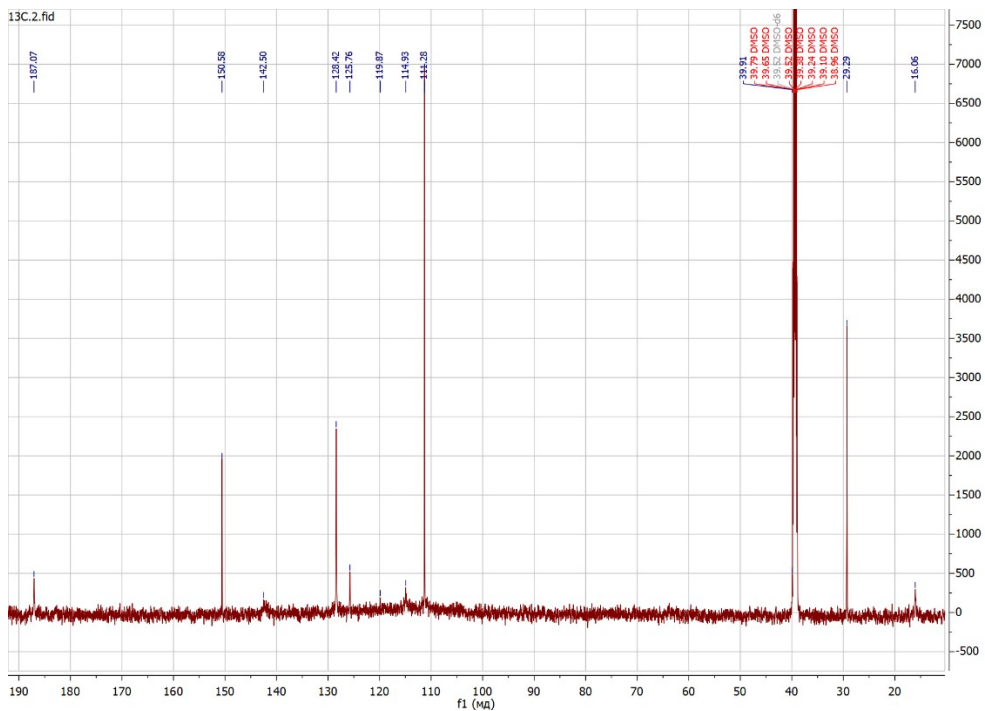

### HRMS (EI):

PANI-73 #5 RT: 0.21 AV: 1 NL: 9.08E4  
T: + c EI Full ms [ 32.50-300.50]

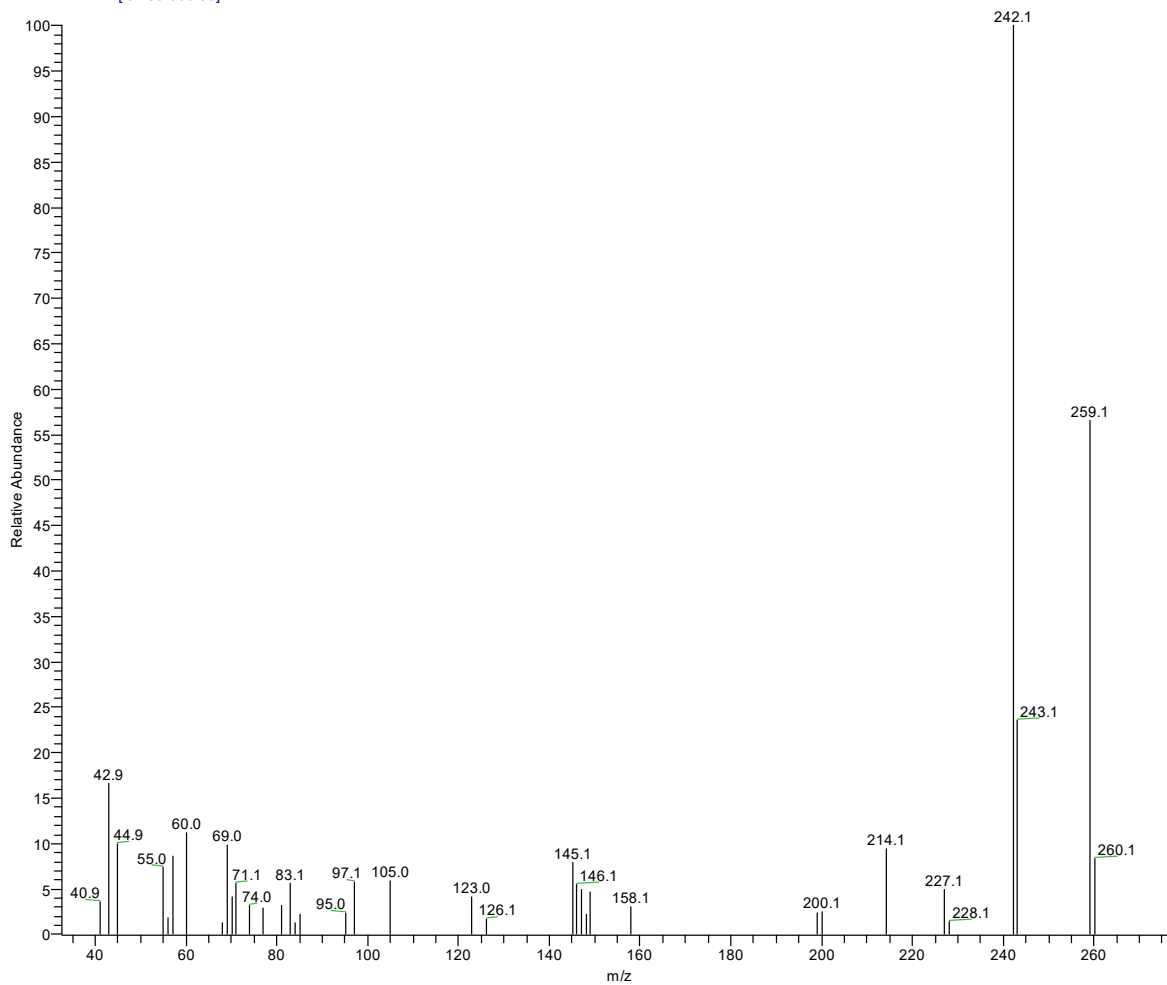

*1-(1-Hydroxy-2-(4-methoxyphenyl)-4-methyl-1H-imidazol-5-yl)ethan-1-one (5e)*

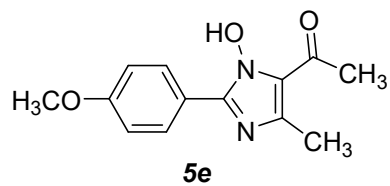

<sup>1</sup>H NMR spectrum in DMSO-d<sub>6</sub>:

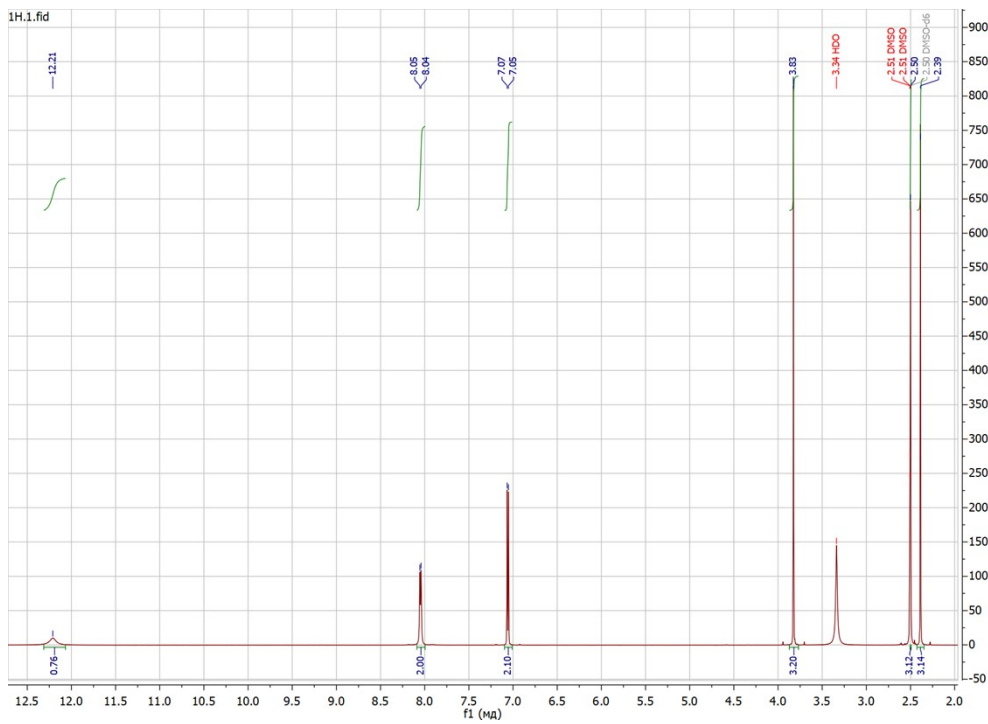

<sup>1</sup>H NMR spectrum in CDCl<sub>3</sub>:

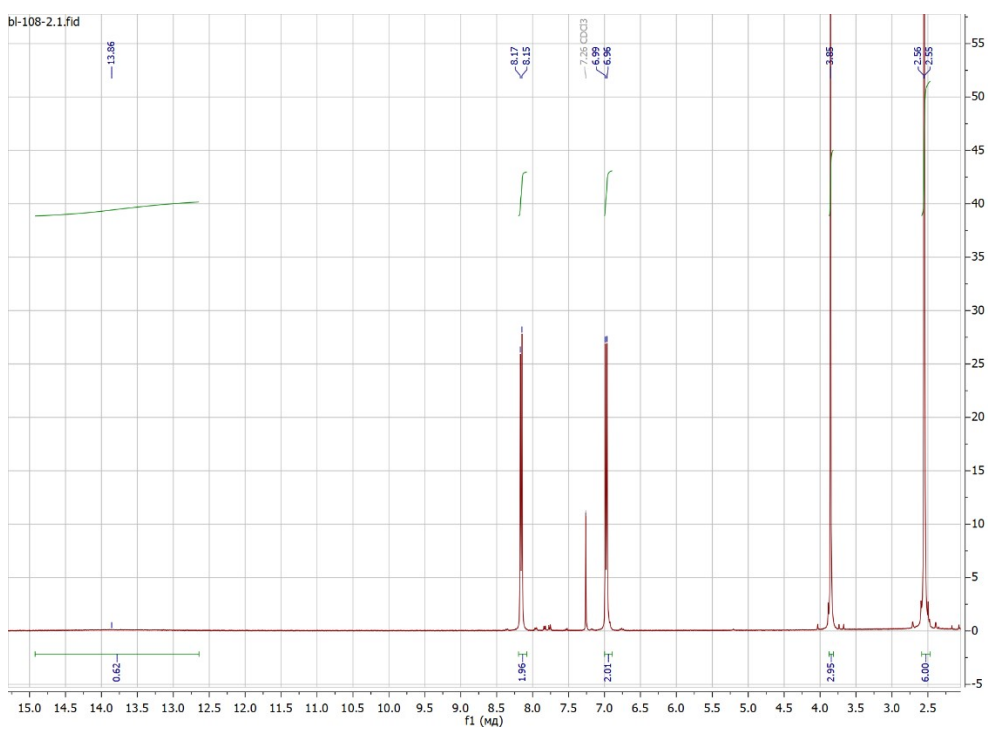

### $^{13}\text{C}$ NMR spectrum in $\text{DMSO-d}_6$ :

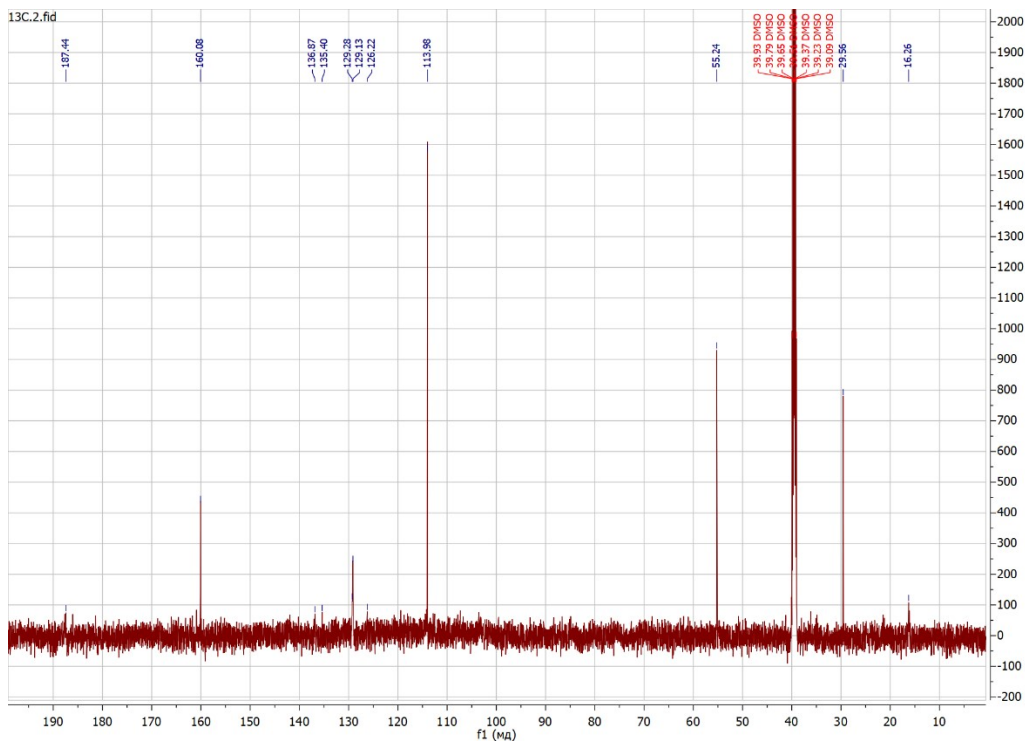

### HRMS (EI):

PANI-153 #9 RT: 0.56 AV: 1 NL: 2.14E7  
T: + c EI Full ms [ 14.50-300.50]

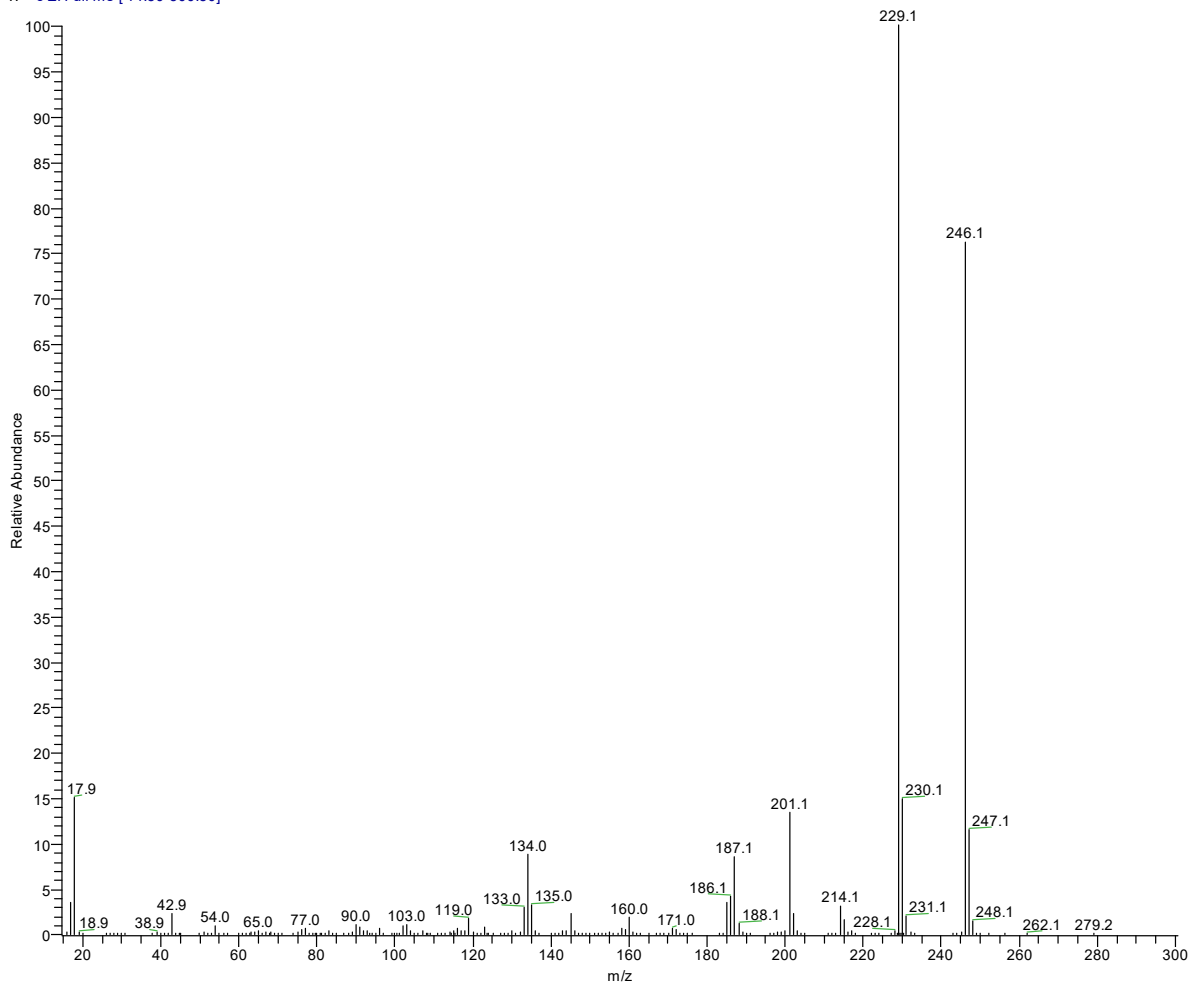

3-Methoxy-6,6-dimethyl-2-(4-nitrophenyl)-3,5,6,7-tetrahydro-4H-benzo[d]imidazol-4-one (**6a**).

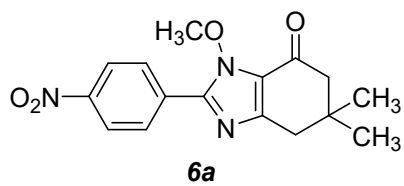

$^1\text{H}$  NMR spectrum in  $\text{DMSO-d}_6$ :

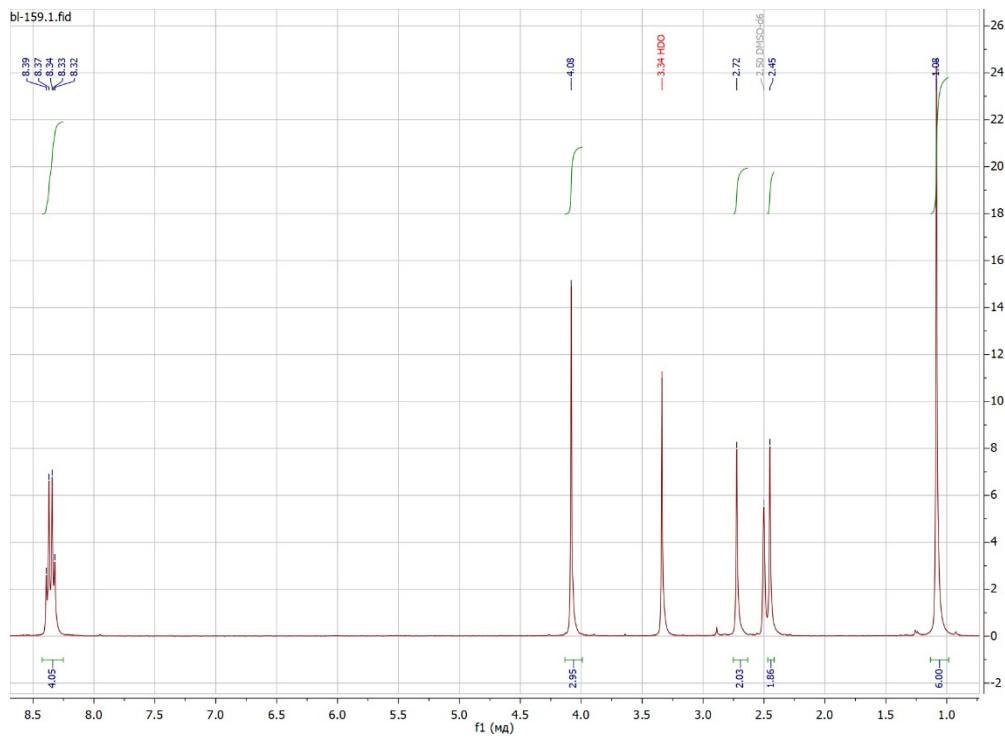

$^{13}\text{C}$  NMR spectrum in  $\text{DMSO-d}_6$ :

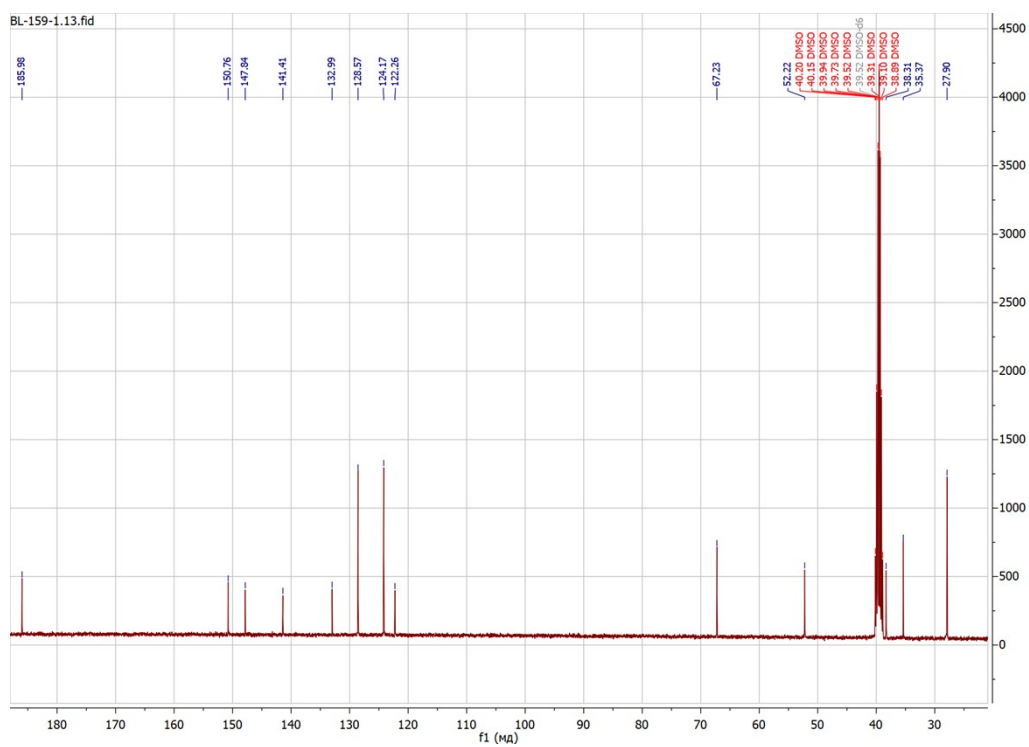

HSQC in DMSO-d<sub>6</sub>:

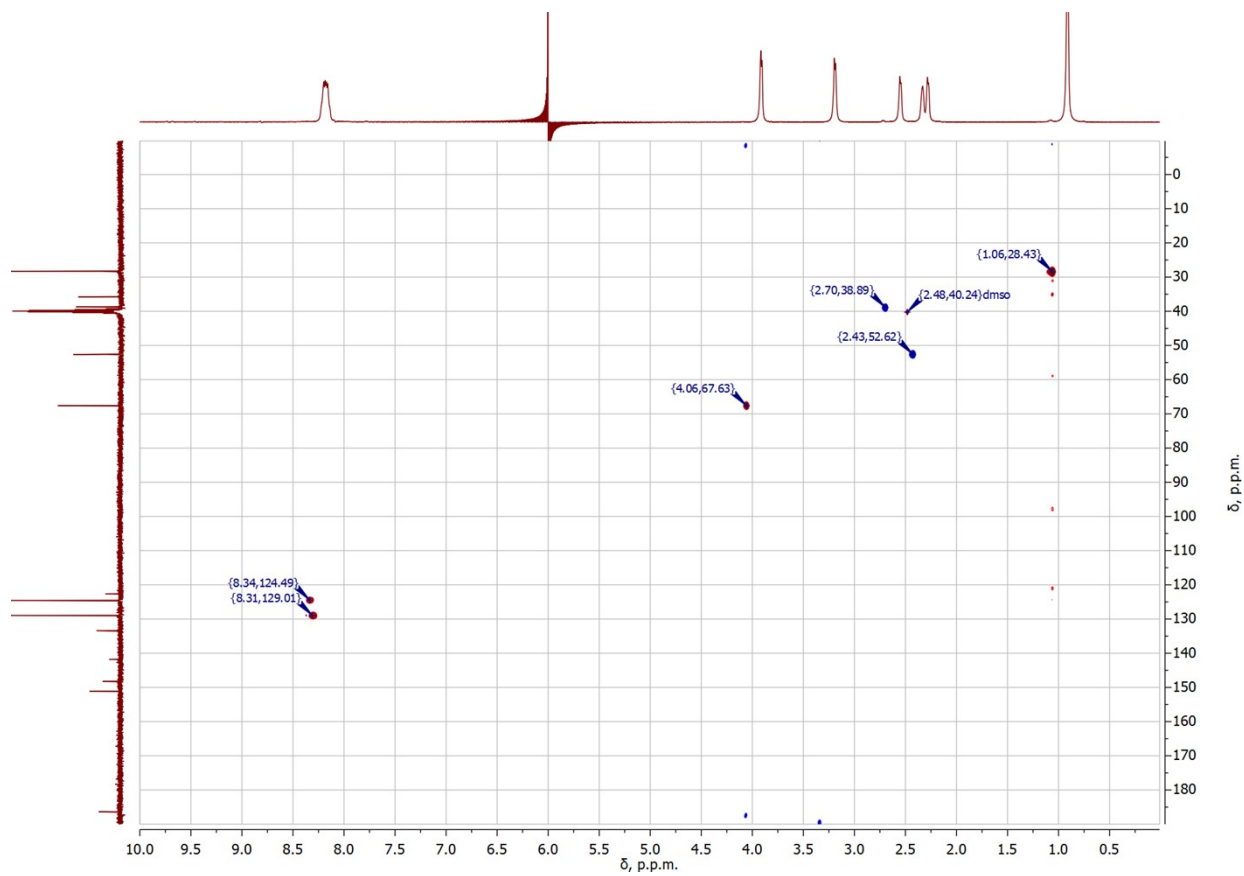

HMBC in DMSO-d<sub>6</sub>:

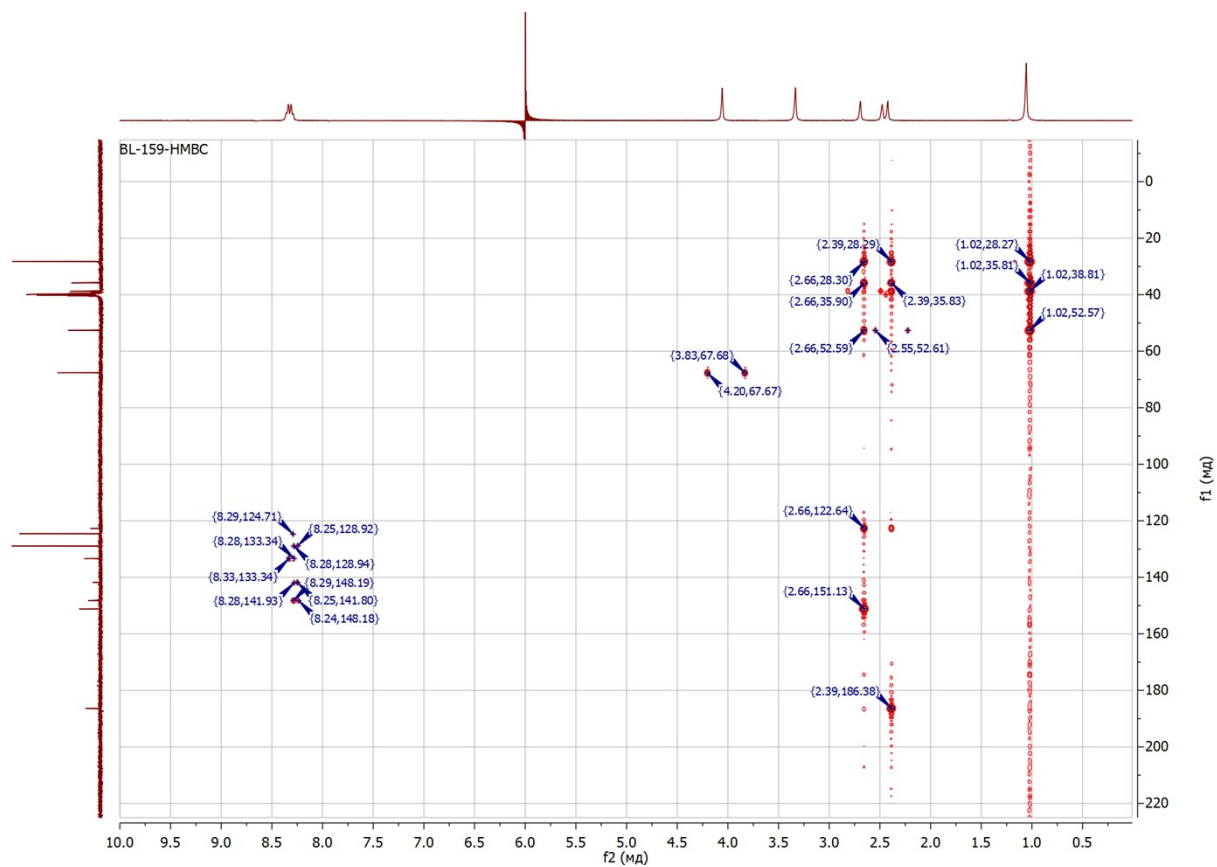

# HRMS (EI):

PANI-123 #18 RT: 0.95 AV: 1 NL: 5.86E6  
T: + c EI Full ms [32.50-350.50]

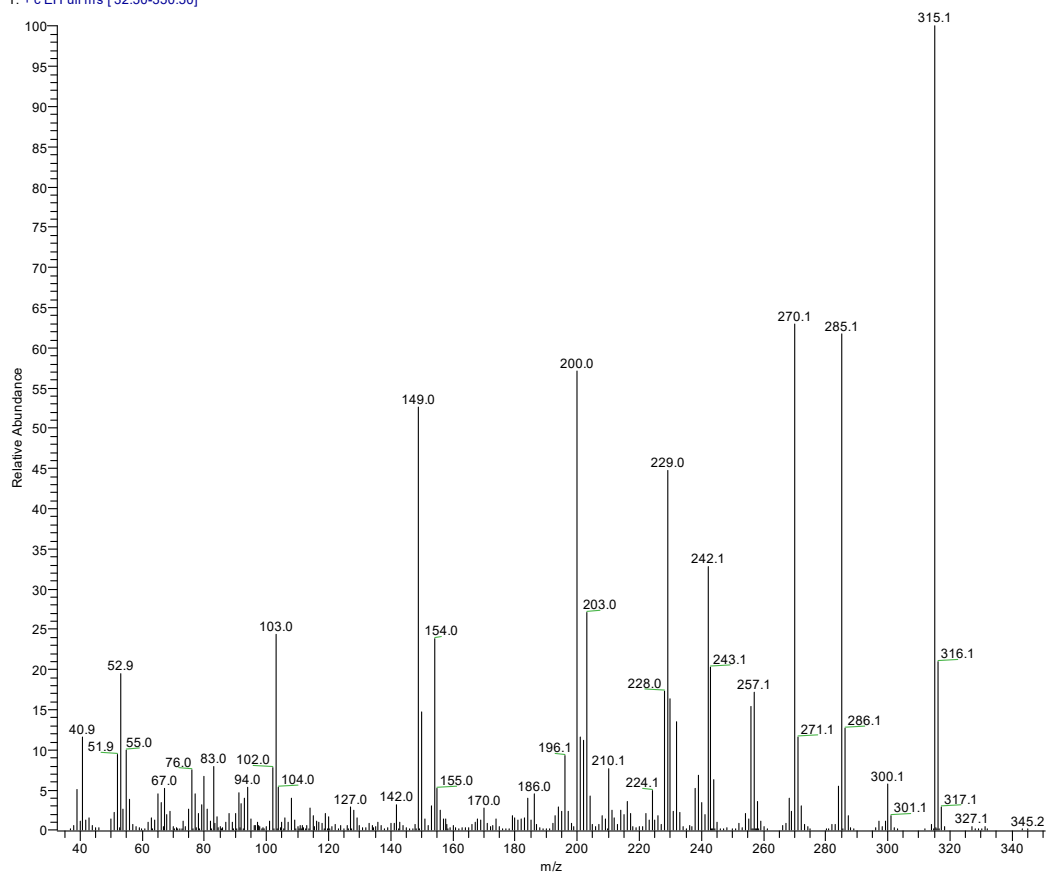

4-(1-Methoxy-5,5-dimethyl-7-oxo-4,5,6,7-tetrahydro-1H-benzo[d]imidazol-2-yl)benzonitrile (**6b**).

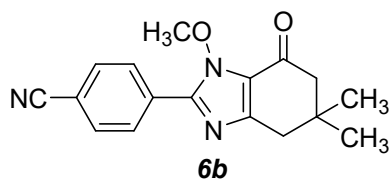

$^1\text{H}$  NMR spectrum in  $\text{DMSO-d}_6$ :

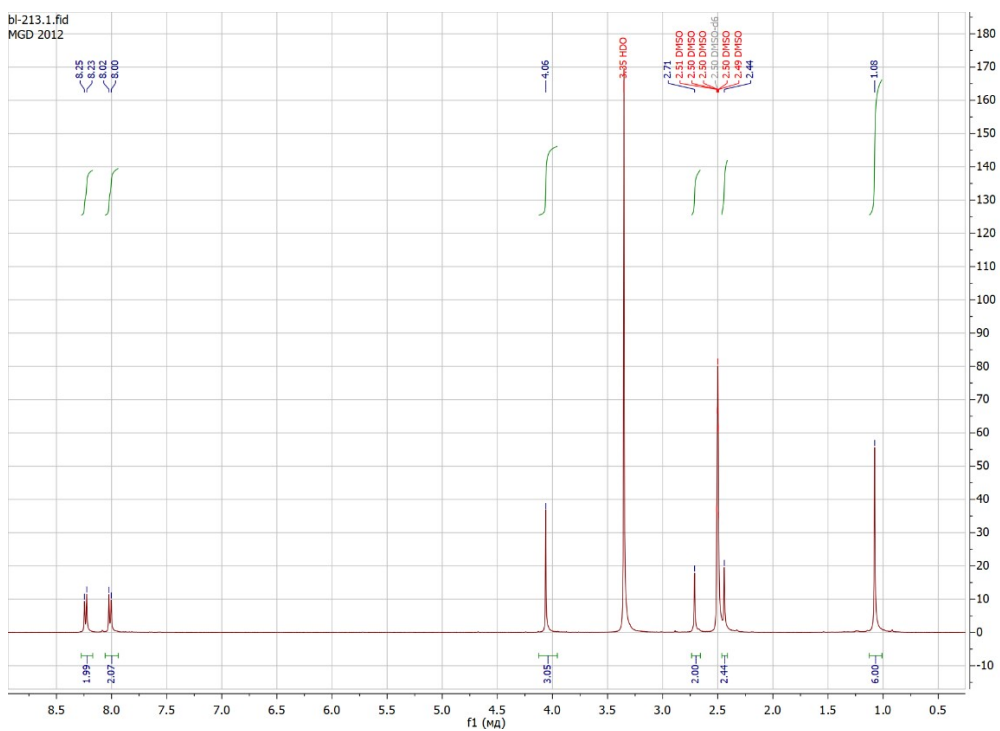

$^{13}\text{C}$  NMR spectrum in  $\text{DMSO-d}_6$ :

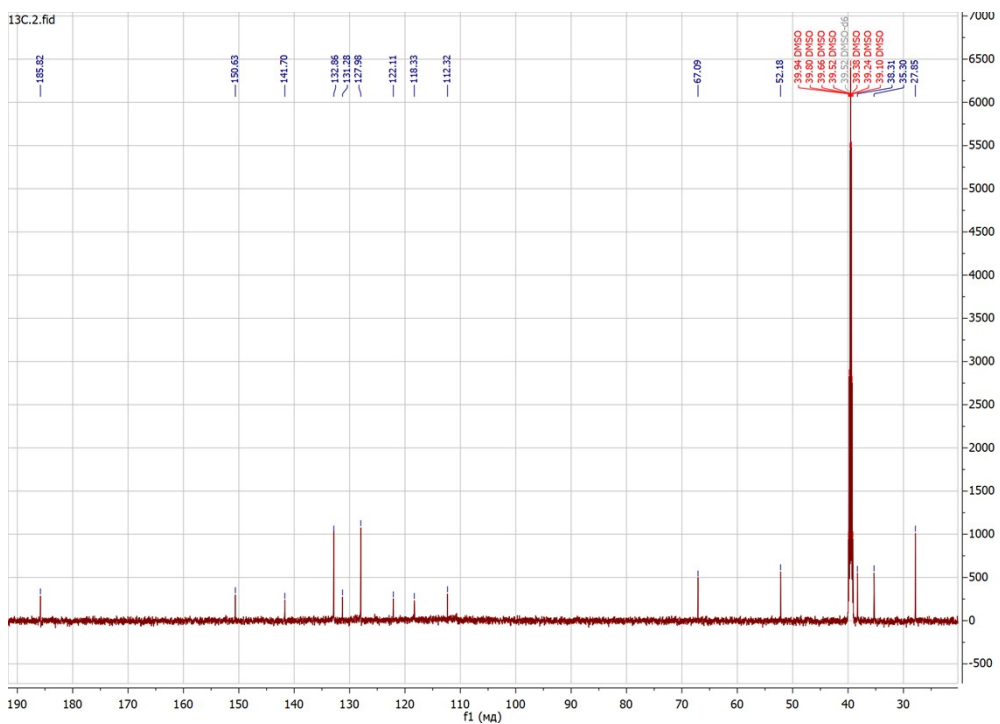



# HRMS (EI):

PANI-174 #12 RT: 0.71 AV: 1 NL: 4.72E5  
T: + c EI Full ms [ 14.50-320.50]

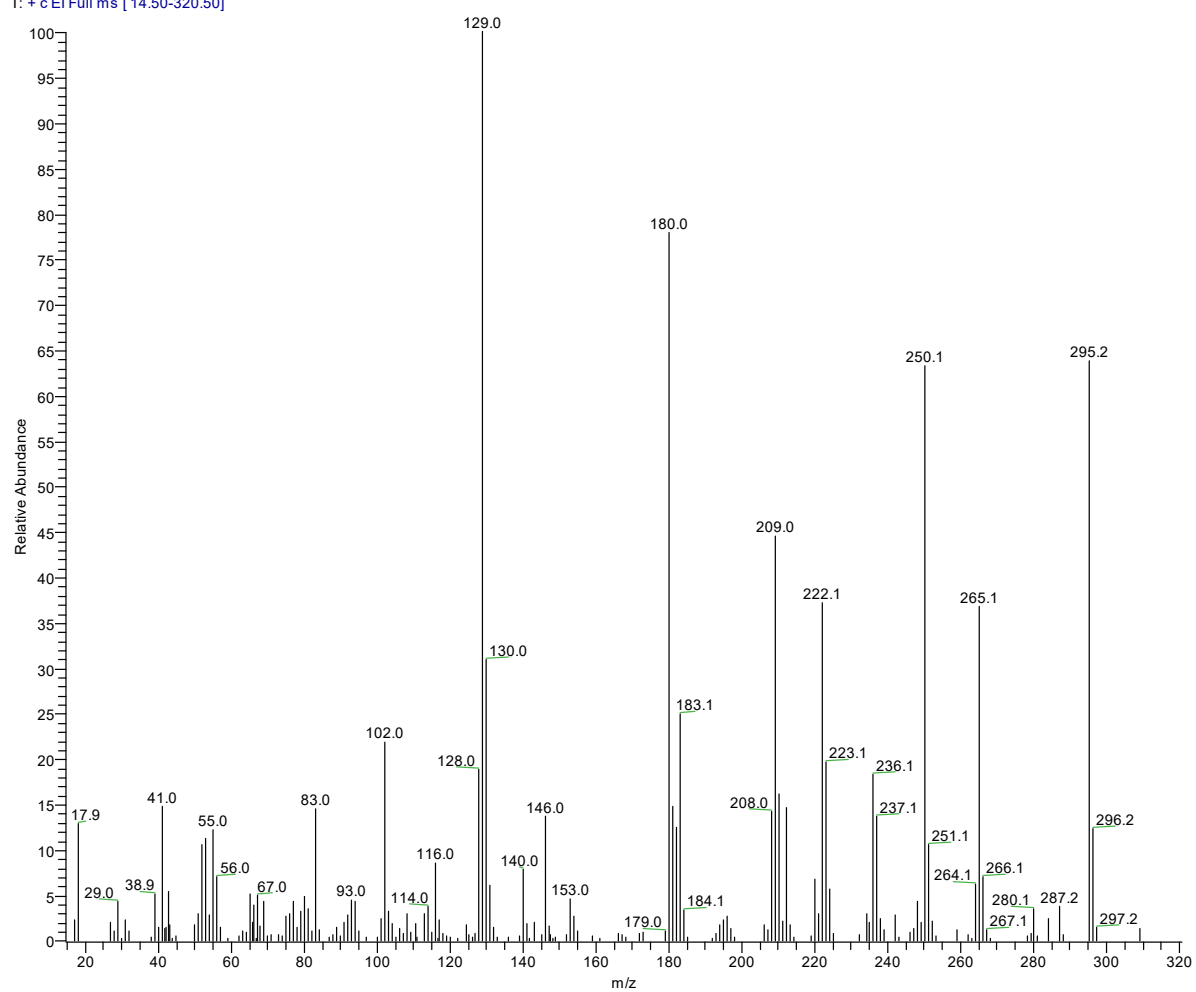

1-(1-Methoxy-4-methyl-2-(4-nitrophenyl)-1H-imidazol-5-yl)ethan-1-one (7a).

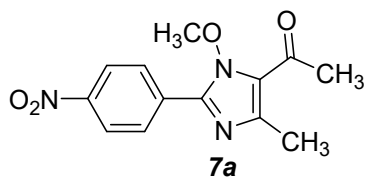

<sup>1</sup>H NMR spectrum in DMSO-d<sub>6</sub>:

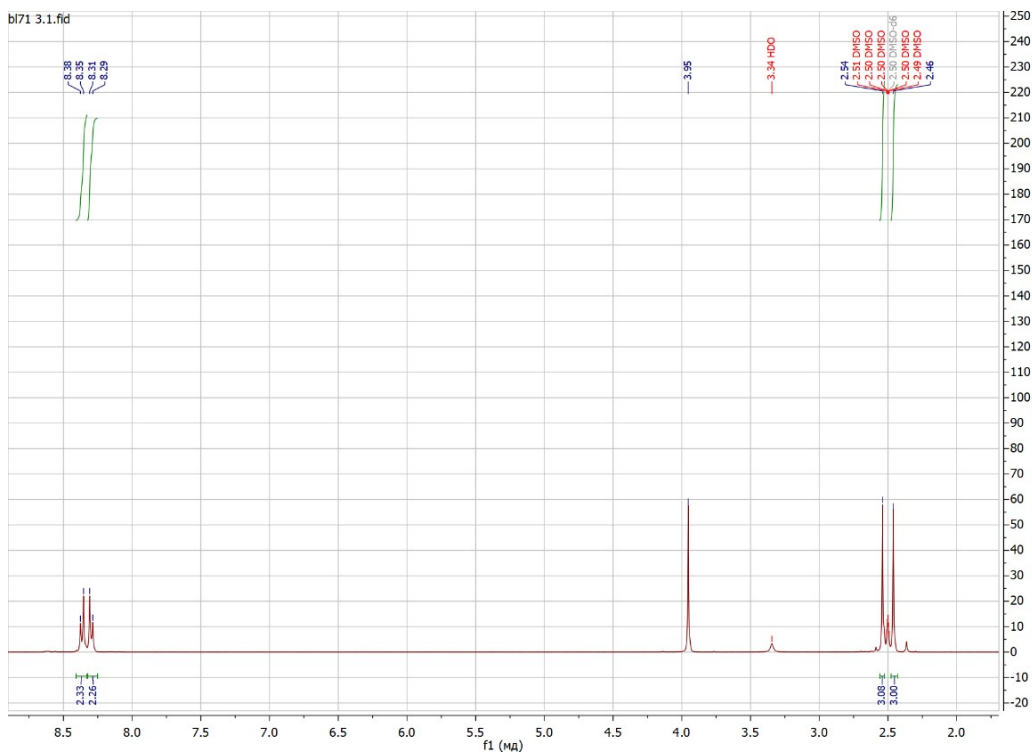

<sup>13</sup>C NMR spectrum in DMSO-d<sub>6</sub>:

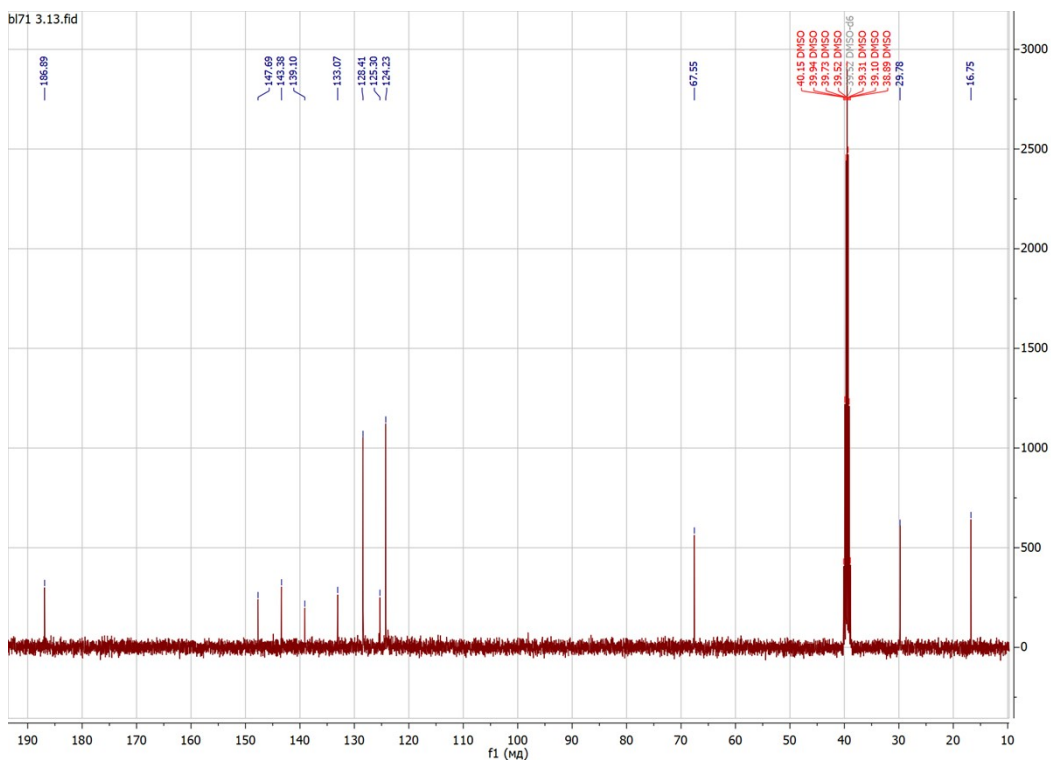

HRMS (ESI):

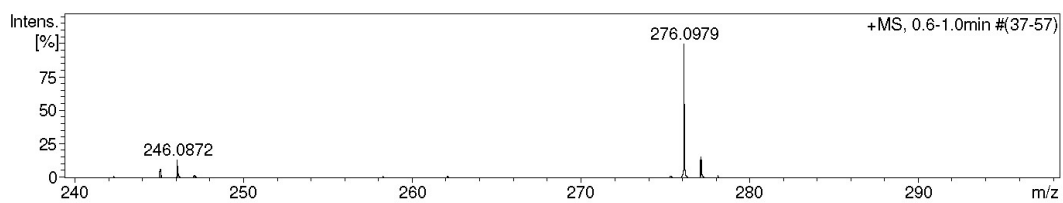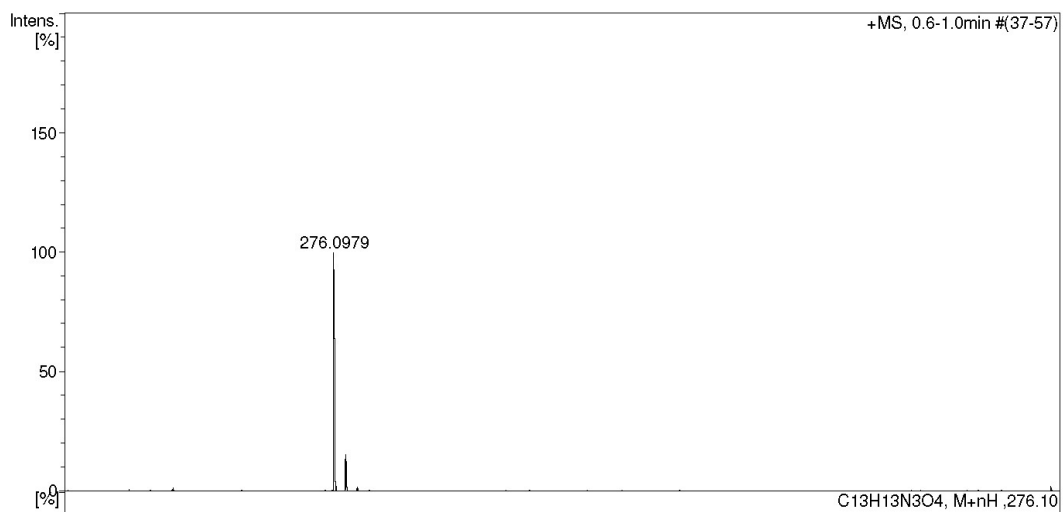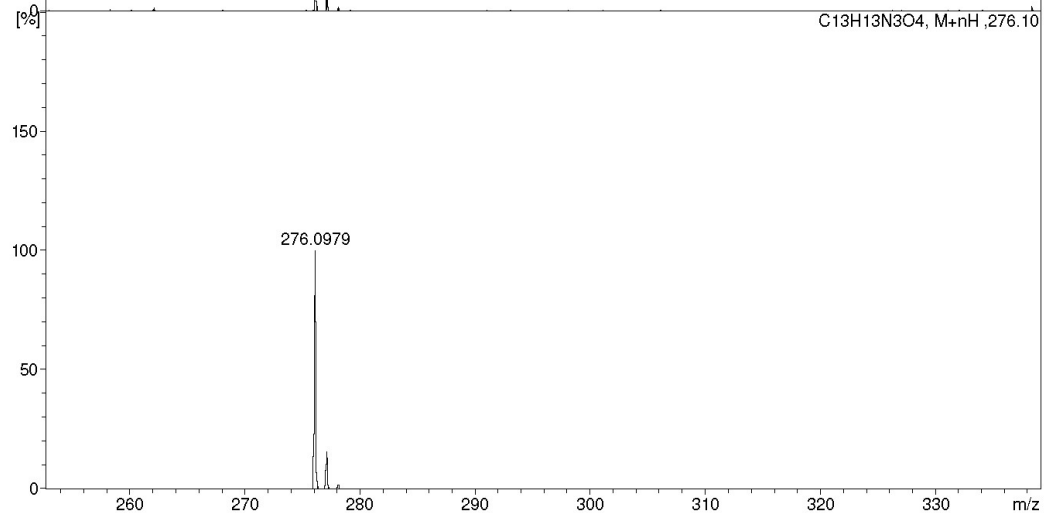

4-(5-Acetyl-1-methoxy-4-methyl-1H-imidazol-2-yl)benzonitrile (**7b**)

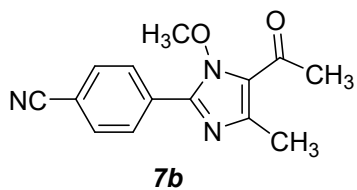

<sup>1</sup>H NMR spectrum in DMSO-d<sub>6</sub>:

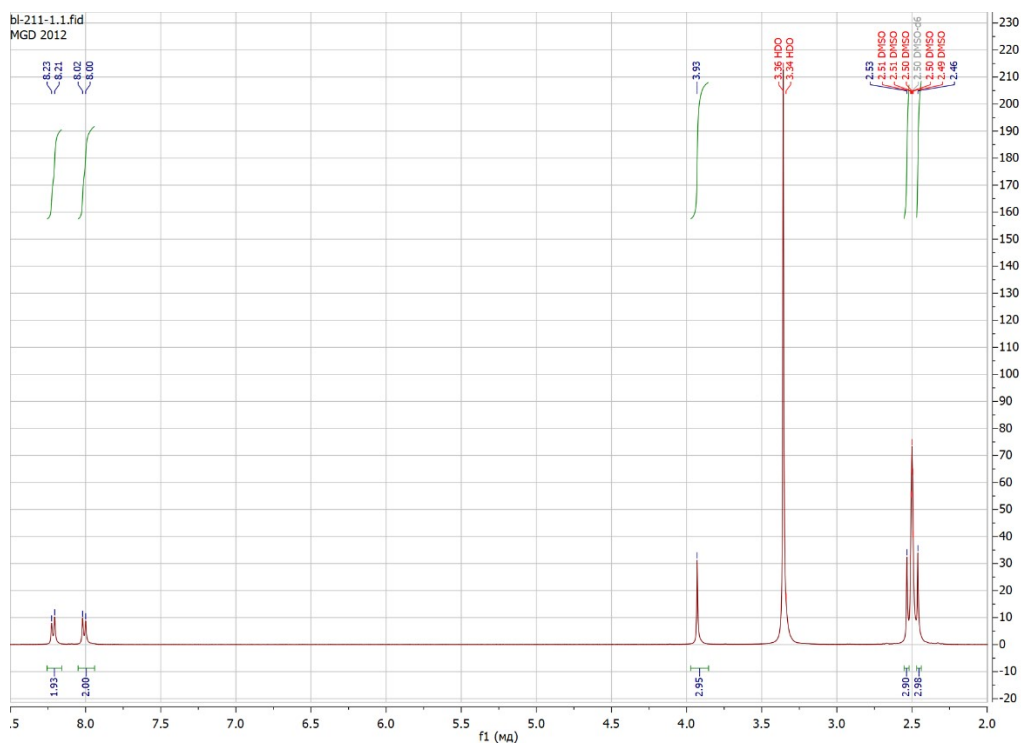

<sup>13</sup>C NMR spectrum in DMSO-d<sub>6</sub>:

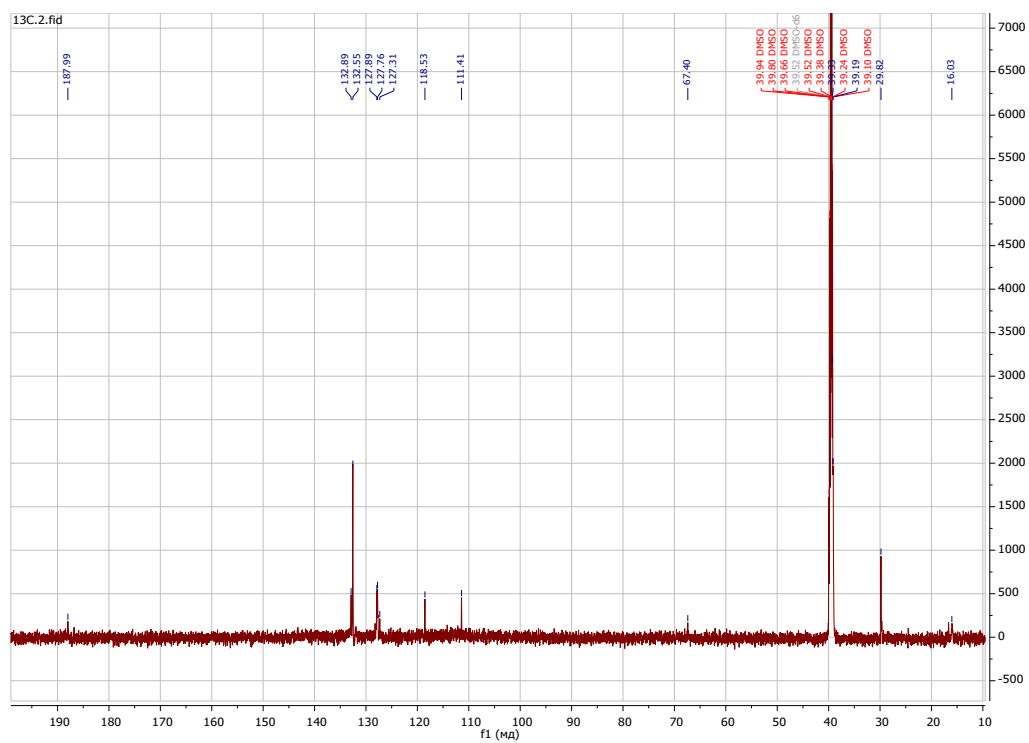

# HRMS (EI):

PANI-172 #1 RT: 0.00 AV: 1 NL: 6.53E5  
T: + c EI Full ms [ 14.50-300.50]

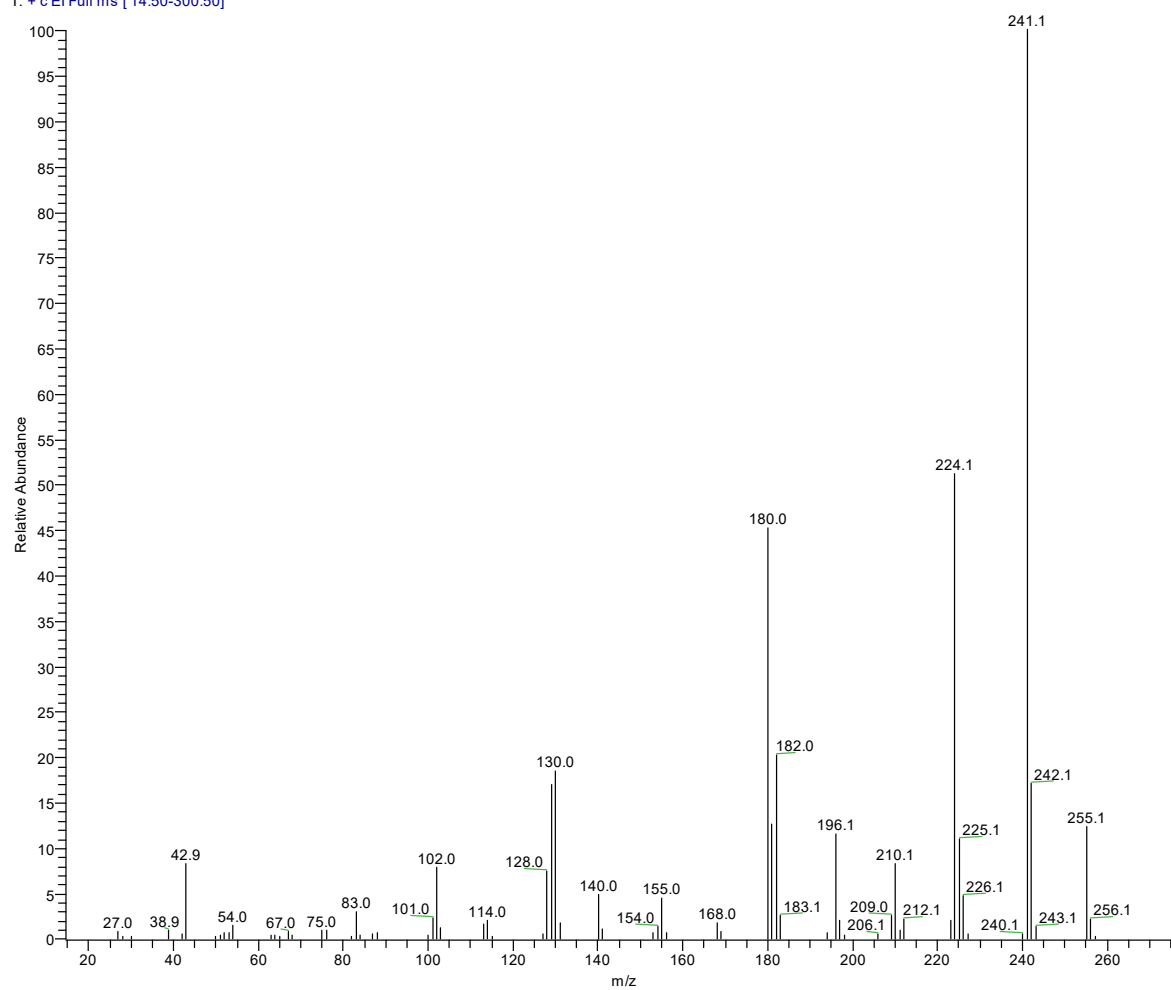

*1-(1-Methoxy-4-methyl-2-(4-(trifluoromethyl)phenyl)-1H-imidazol-5-yl)ethan-1-one (7c)*

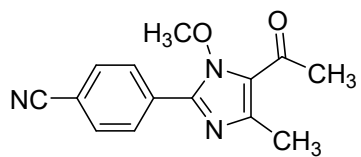

**7c**

<sup>1</sup>H NMR spectrum in DMSO-d<sub>6</sub>:

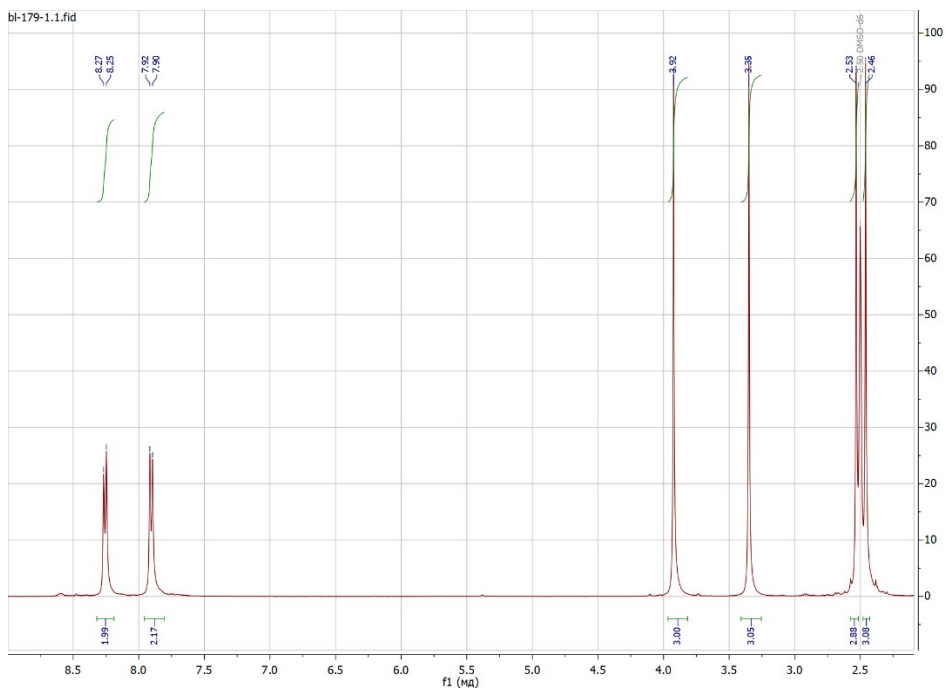

<sup>13</sup>C NMR spectrum in DMSO-d<sub>6</sub>:

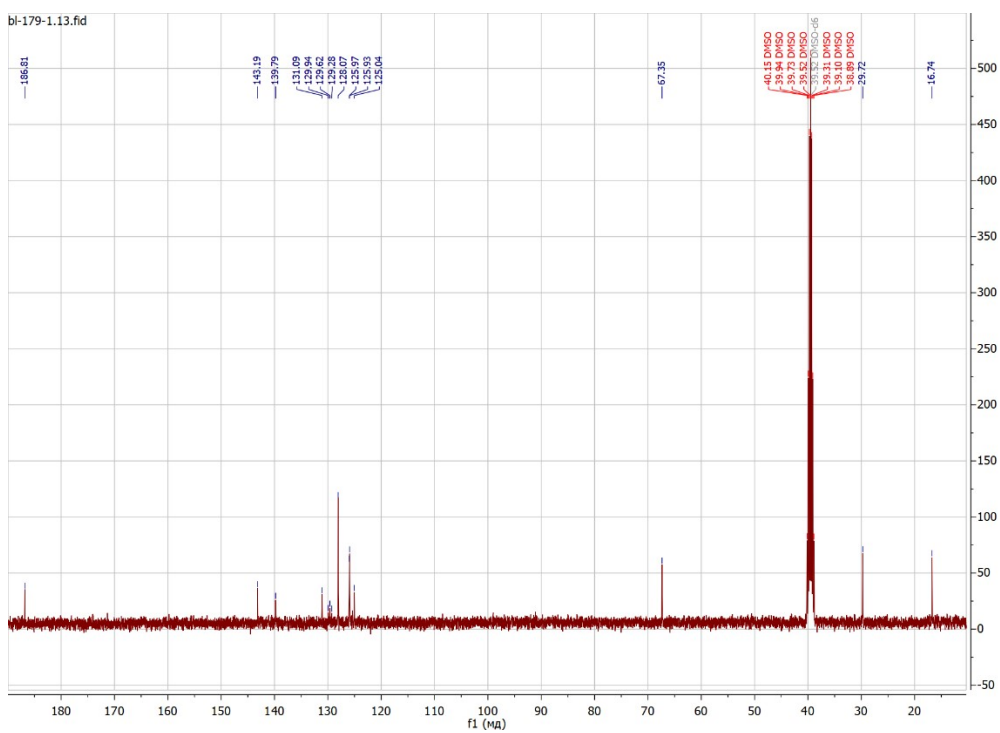

HRMS (ESI):

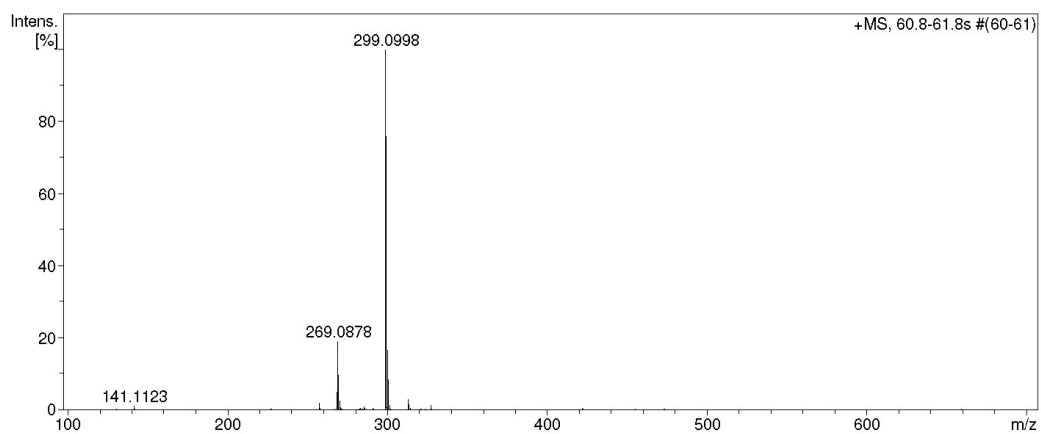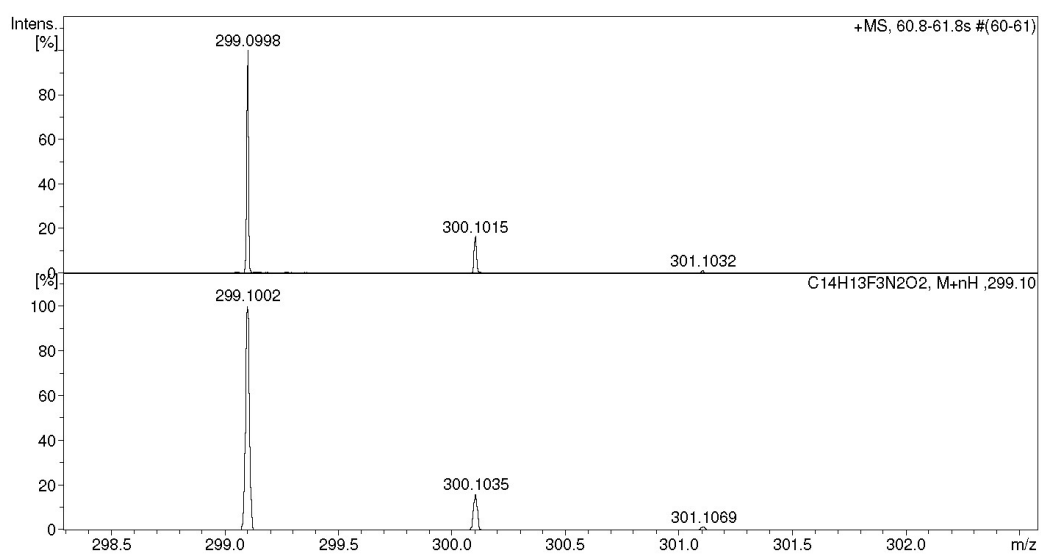

*1-(2-(4-(Dimethylamino)phenyl)-1-methoxy-4-methyl-1H-imidazol-5-yl)ethan-1-one (7d)*

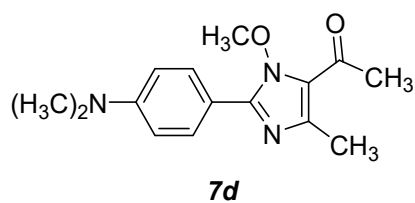

<sup>1</sup>H NMR spectrum in DMSO-d<sub>6</sub>:

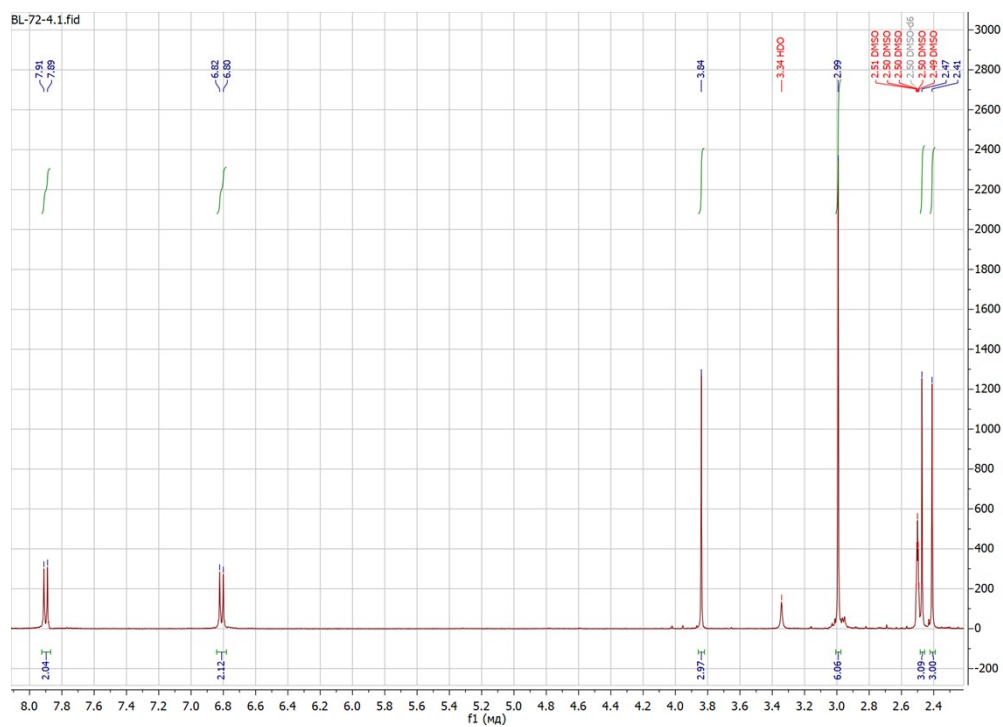

<sup>1</sup>H NMR spectrum in CDCl<sub>3</sub>:

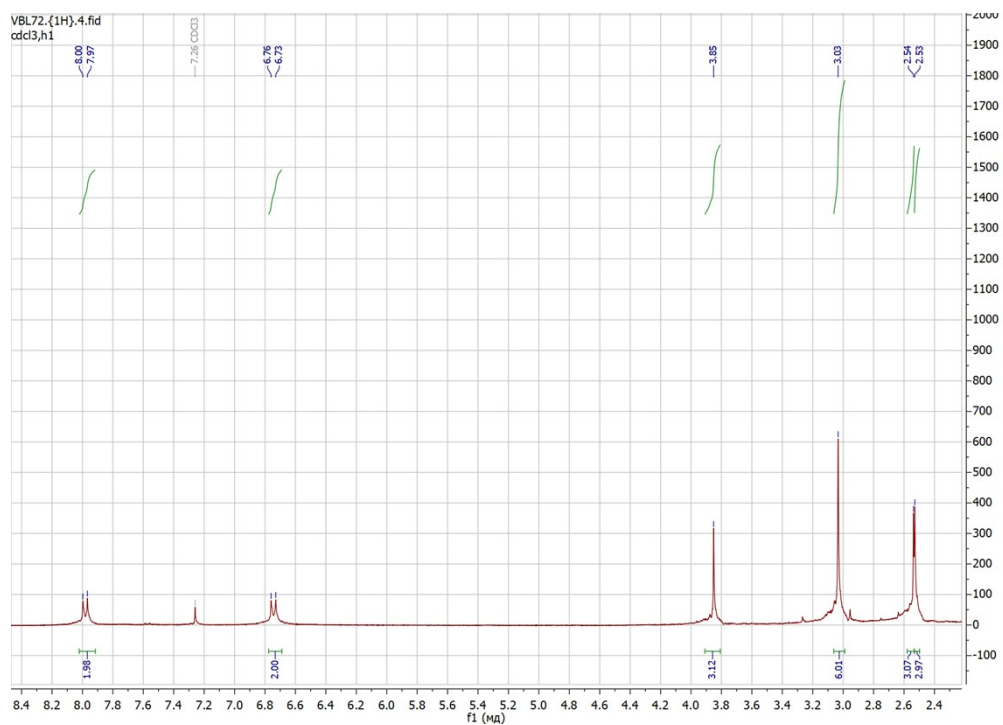



### $^{13}\text{C}$ NMR spectrum in $\text{DMSO-d}_6$ :

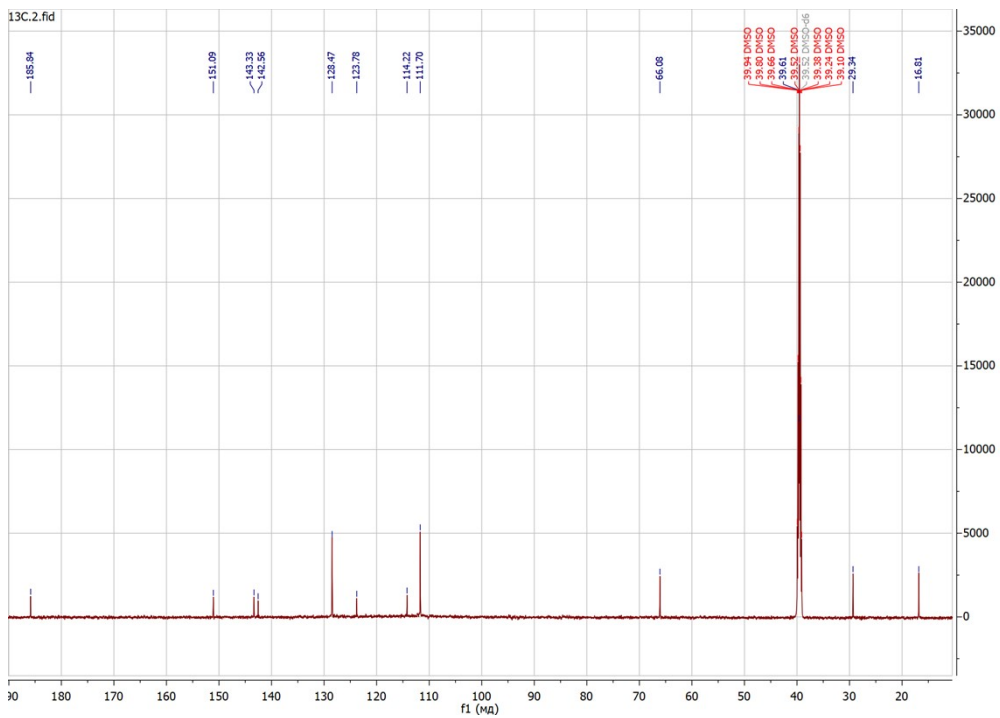

### HRMS (EI):

PANI-88 #3 RT: 0.14 AV: 1 NL: 1.82E5  
T: + c EI Full ms [ 14.50-300.50]

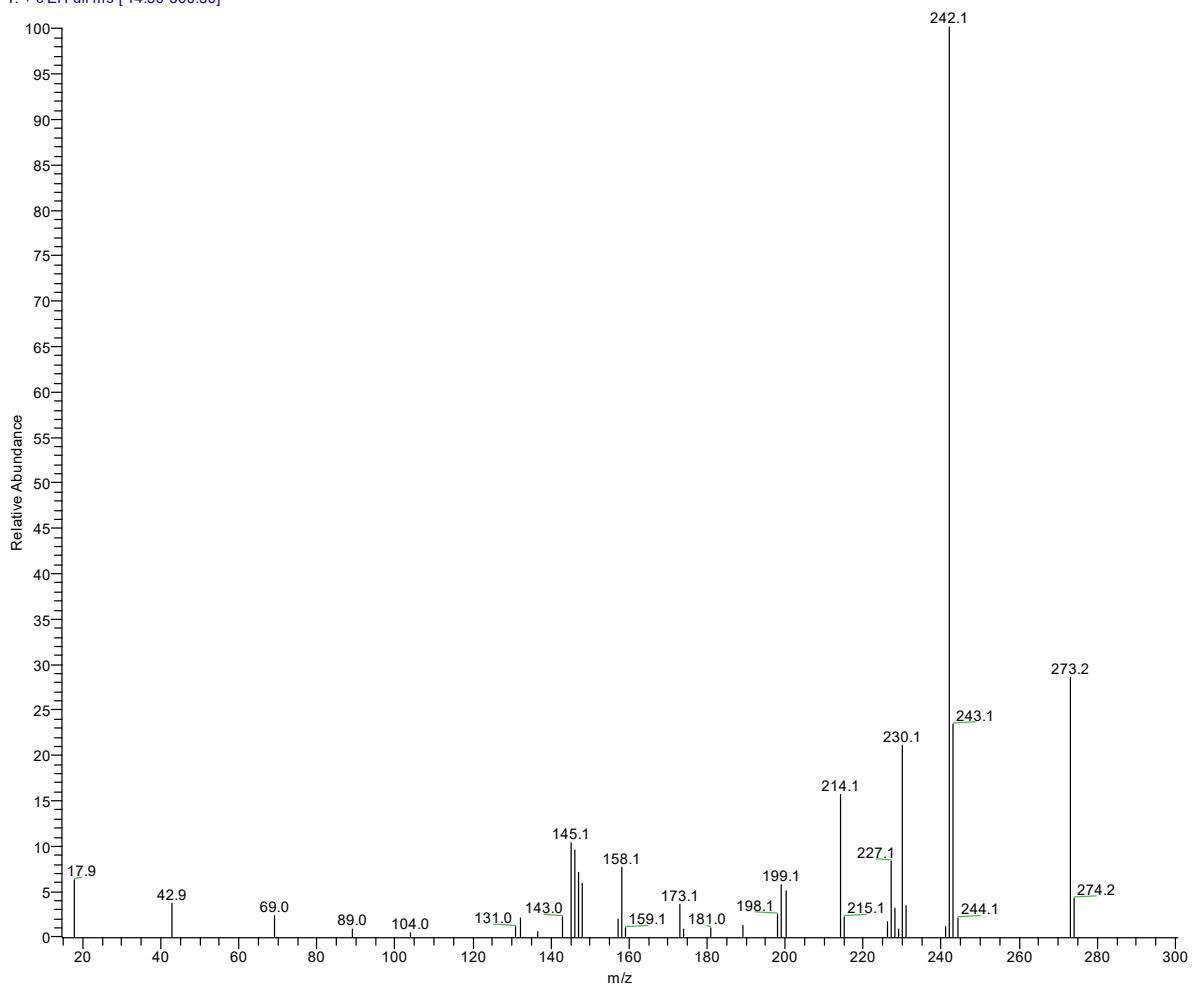

*1-(1-Methoxy-2-(4-methoxyphenyl)-4-methyl-1H-imidazol-5-yl)ethan-1-one (7e)*

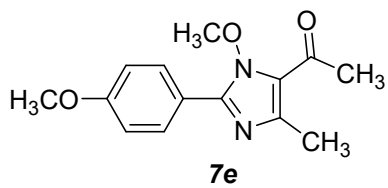

<sup>1</sup>H NMR spectrum in DMSO-d<sub>6</sub>:

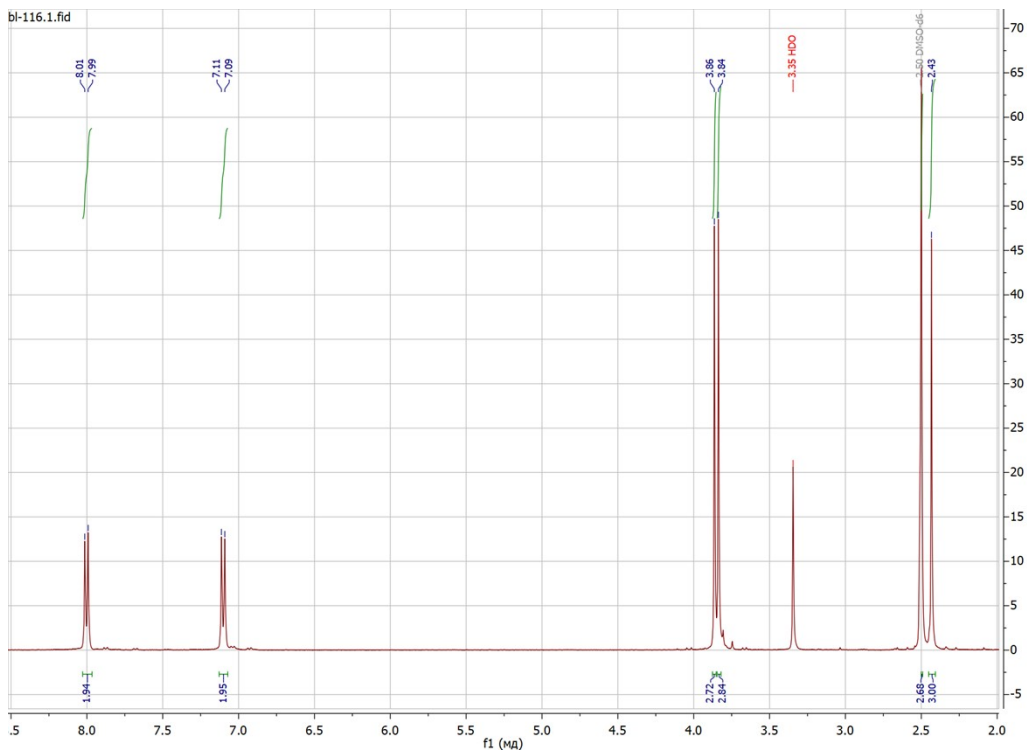

<sup>13</sup>C NMR spectrum in DMSO-d<sub>6</sub>:

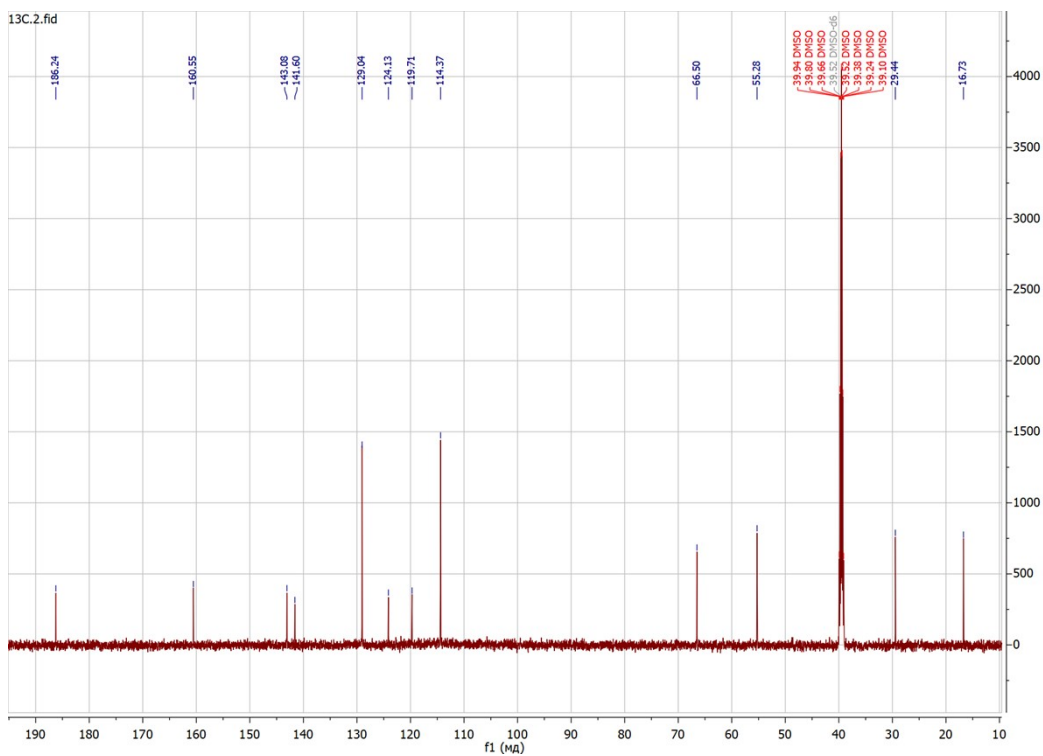

# HRMS (EI):

PANI-89 #13 RT: 0.84 AV: 1 NL: 4.87E4  
T: + c EI Full ms [ 14.50-300.50]

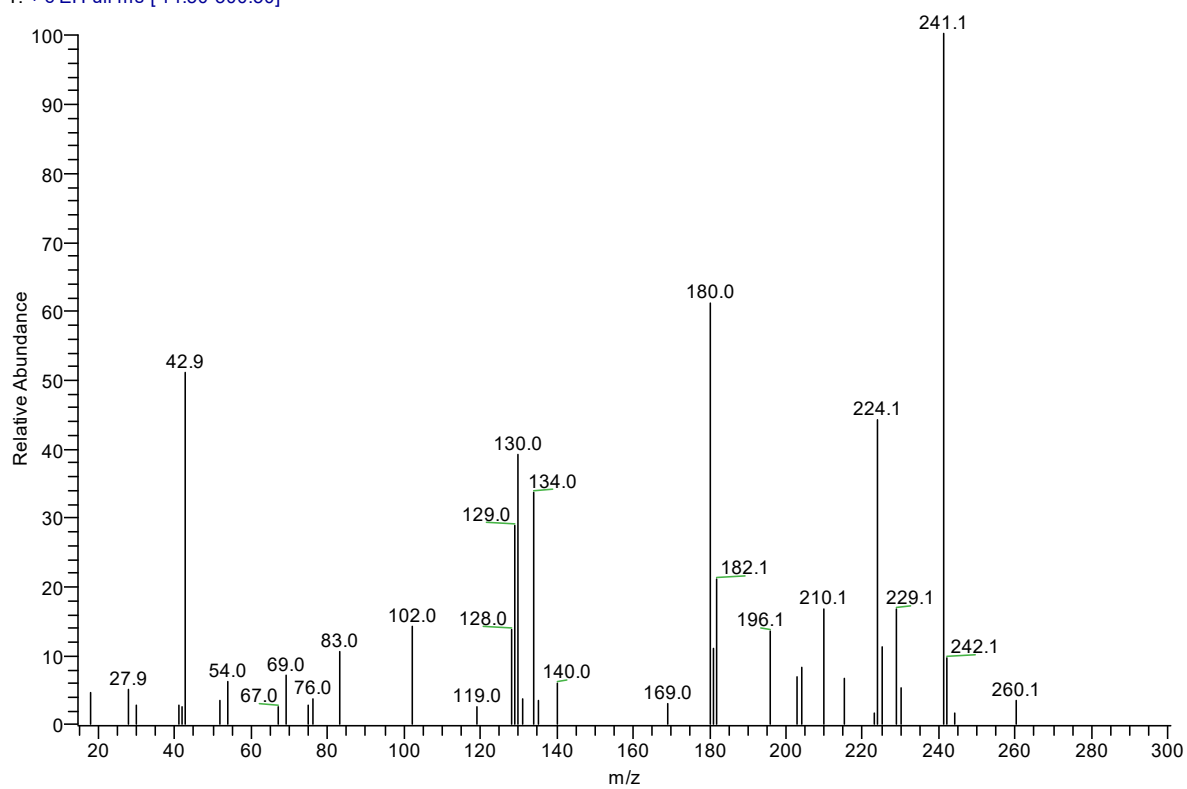

*(E)*-*N*-methyl-1-(4-nitrophenyl)methanimine (**8a**)

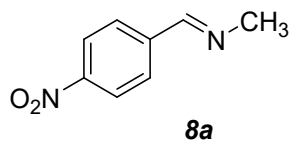

<sup>1</sup>H NMR spectrum in CDCl<sub>3</sub>:

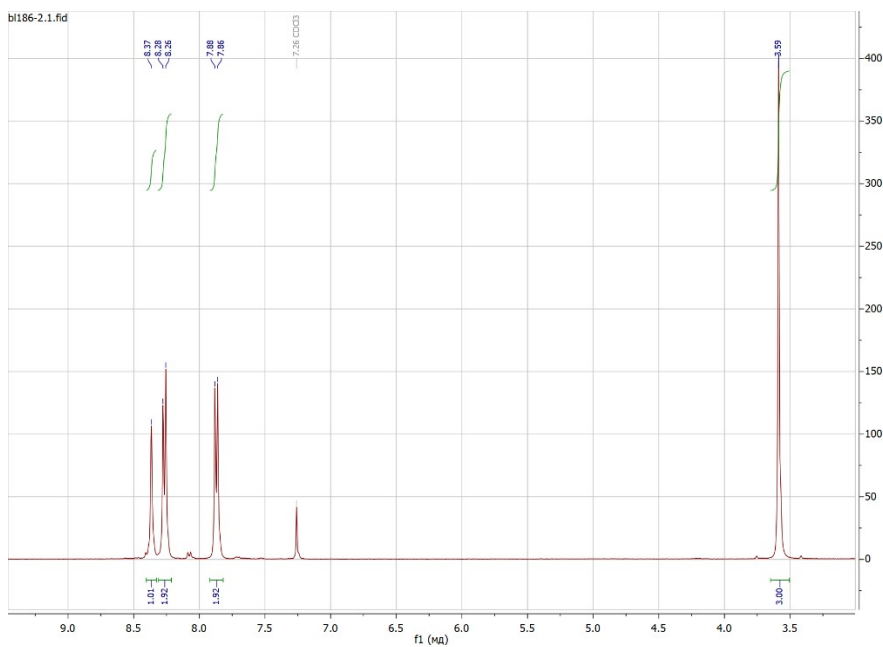

*(E)*-4-((Methylimino)methyl)benzonitrile (**8b**)

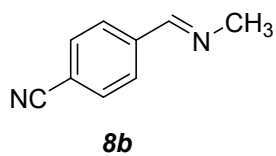

<sup>1</sup>H NMR spectrum in CDCl<sub>3</sub>:

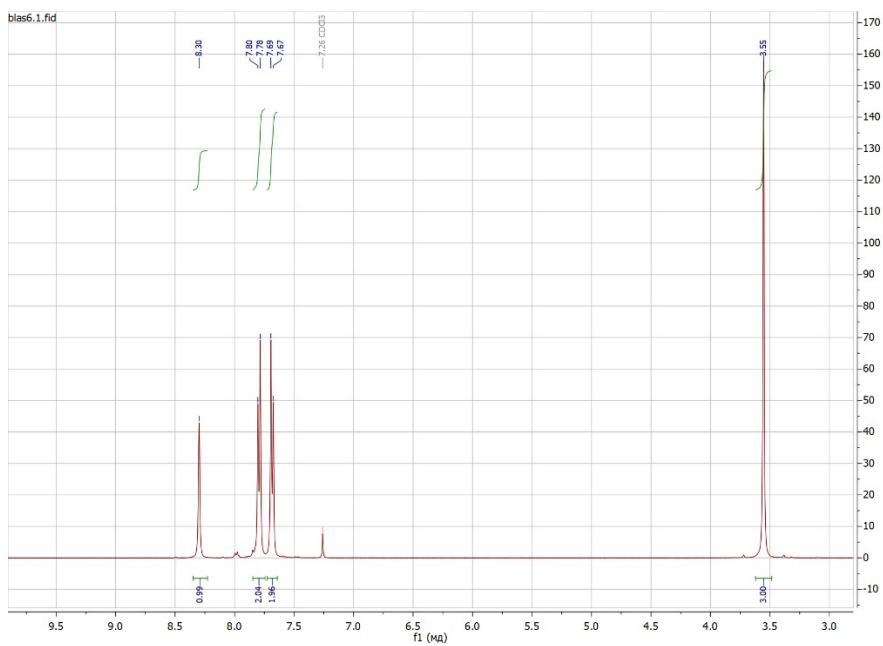

*(E)*-*N*-Methyl-1-(4-(trifluoromethyl)phenyl)methanimine (**8c**).

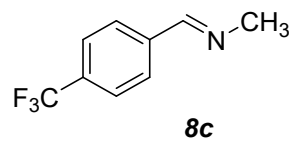

$^1\text{H}$  NMR spectrum in  $\text{CDCl}_3$ :

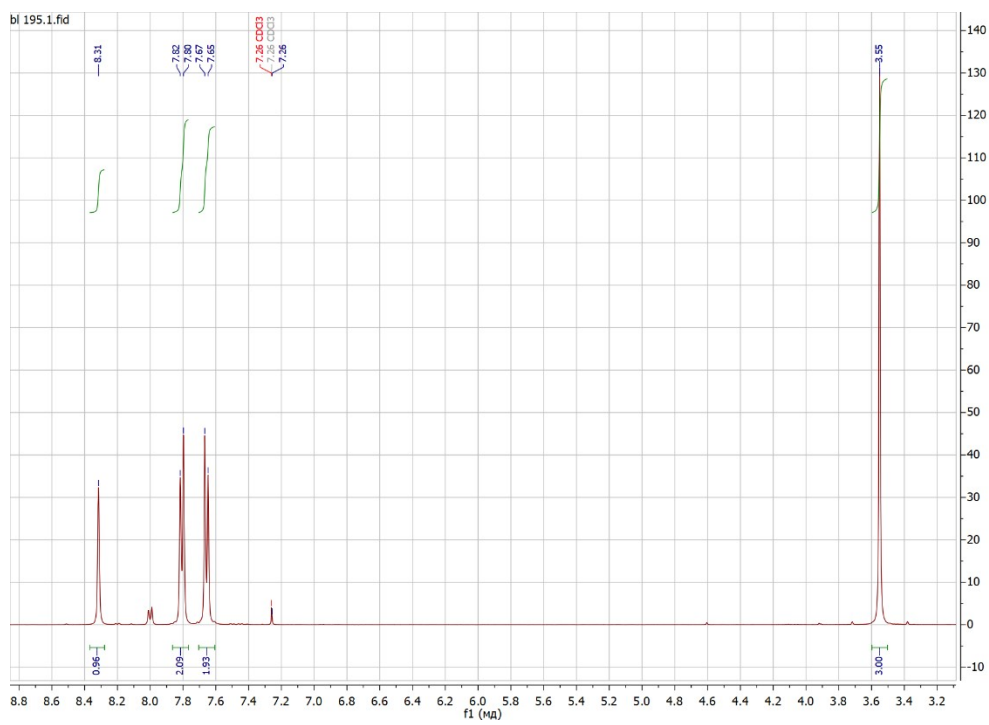



HSQC in DMSO-d<sub>6</sub>:

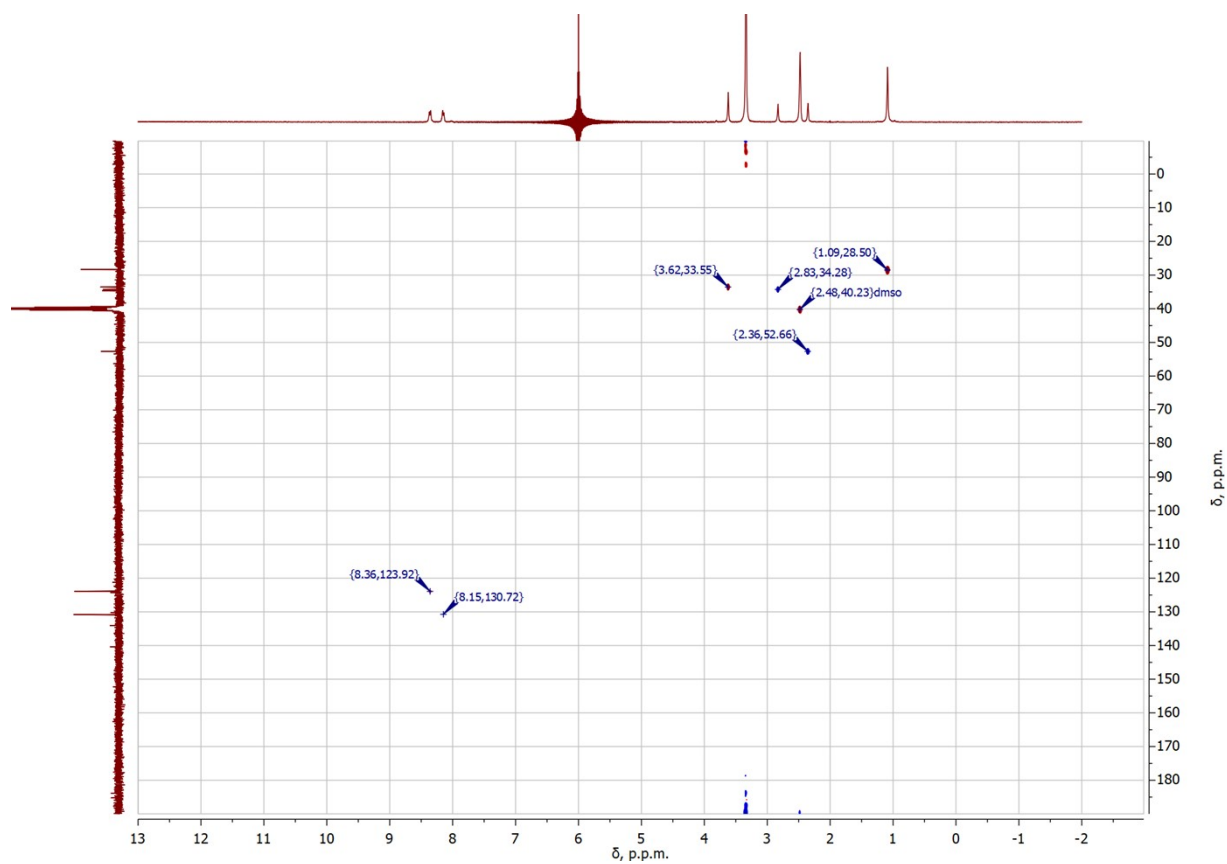

HMBC in DMSO-d<sub>6</sub>:

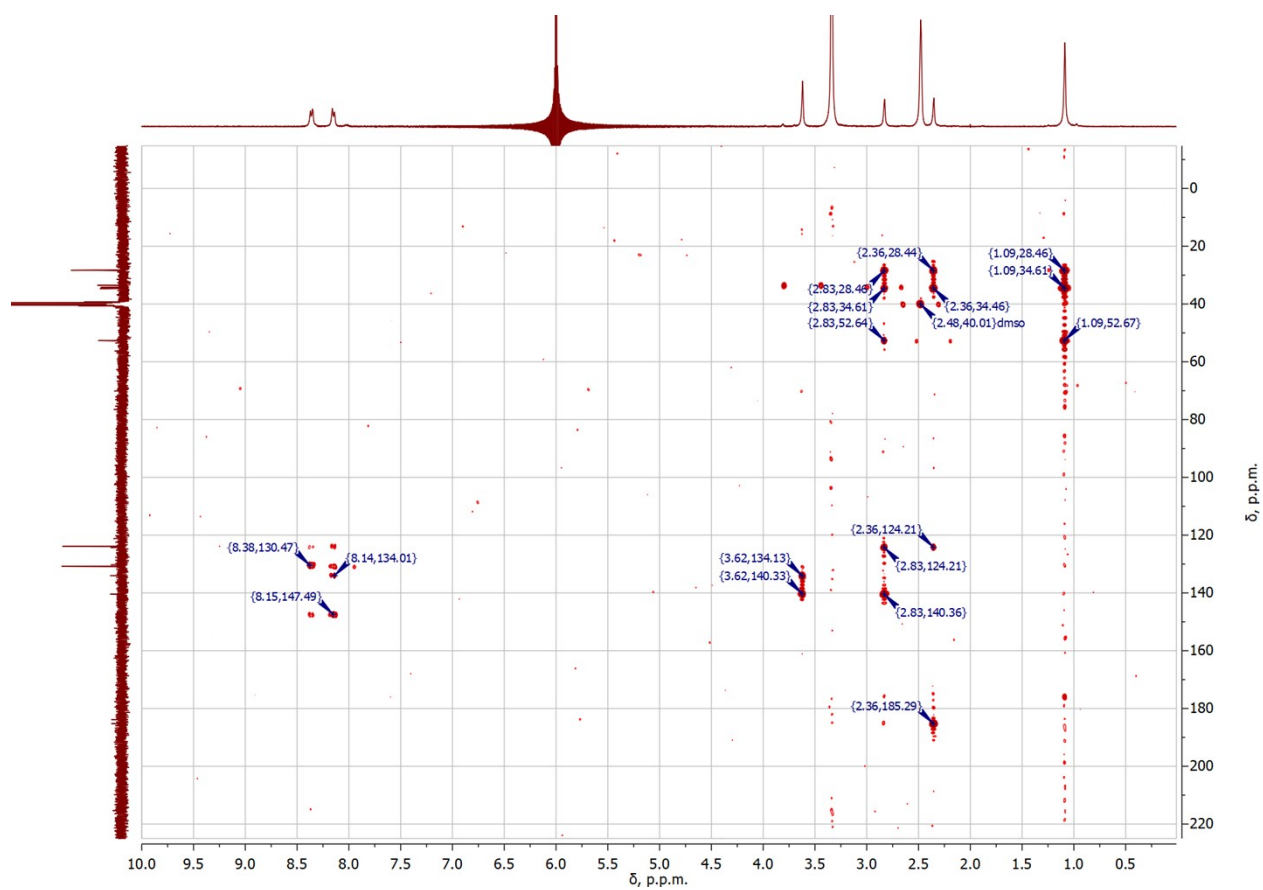

# HRMS (EI):

PANI-136 #46 RT: 2.49 AV: 1 NL: 2.01E4  
T: + c EI Full ms [32.50-330.50]

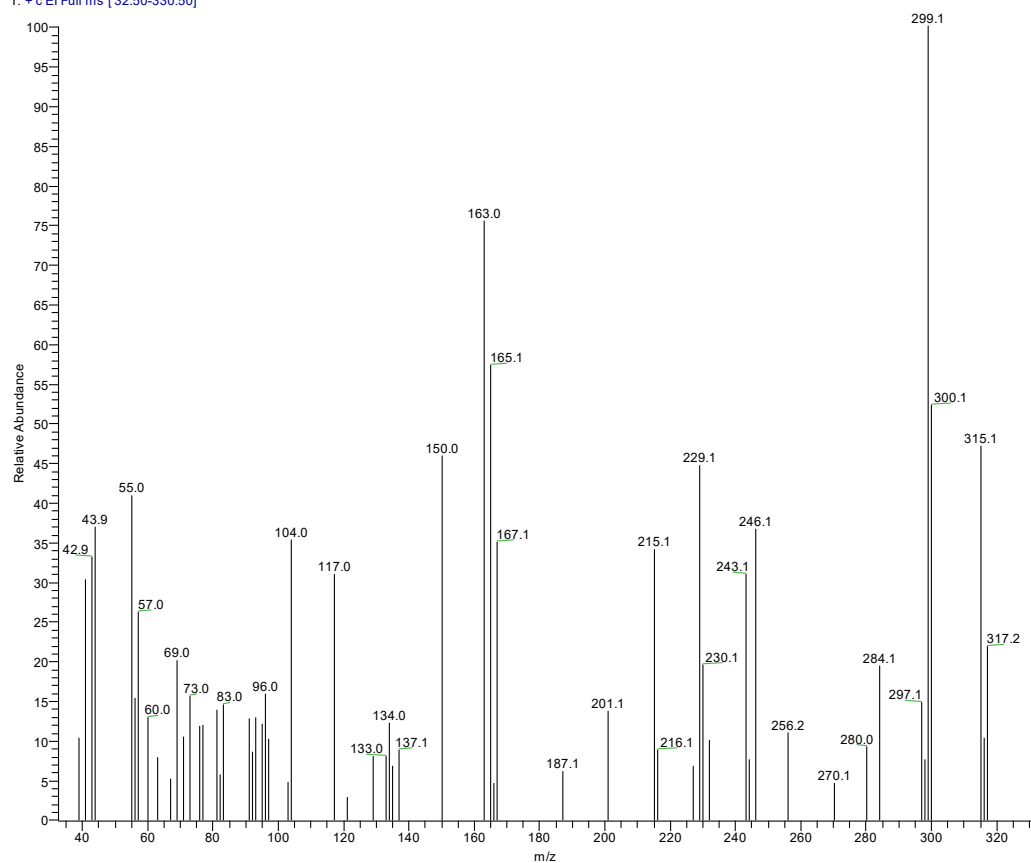





### $^{13}\text{C}$ NMR spectrum in $\text{DMSO-d}_6$ :

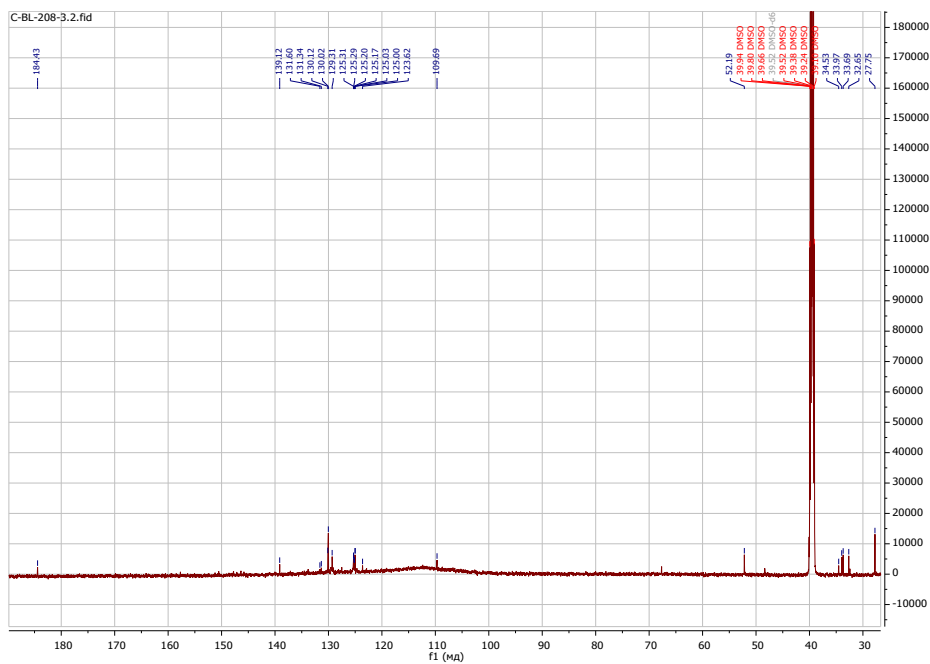

### HRMS (EI):

PANI-162 #26 RT: 1.87 AV: 1 NL: 3.30E5  
T: + c EI Full ms [ 14.50-380.50]

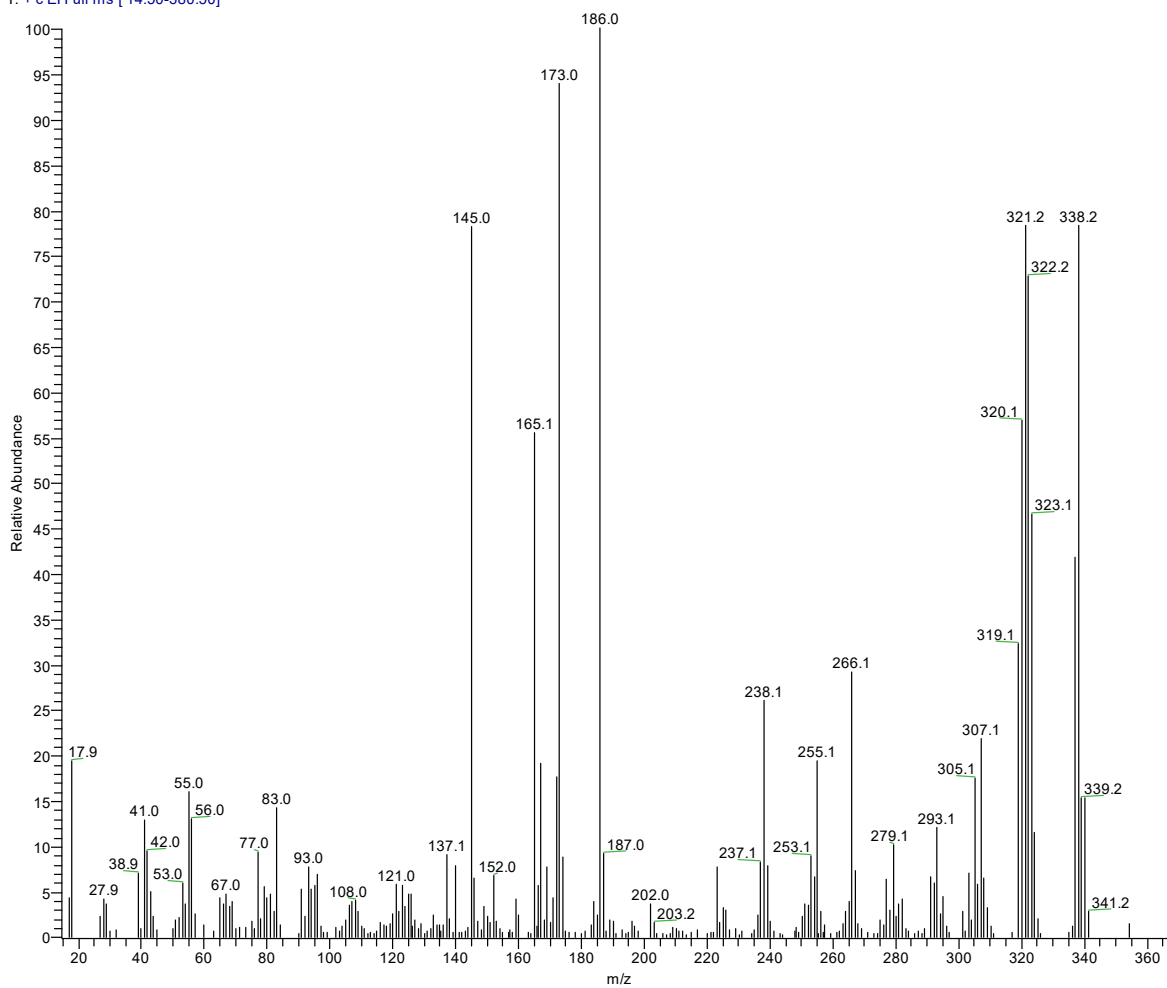

4-Acetyl-1,5-dimethyl-2-(4-nitrophenyl)-1H-imidazole 3-oxide (**10a**)

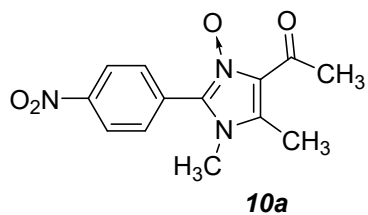

$^1\text{H}$  NMR spectrum in  $\text{CDCl}_3$ :

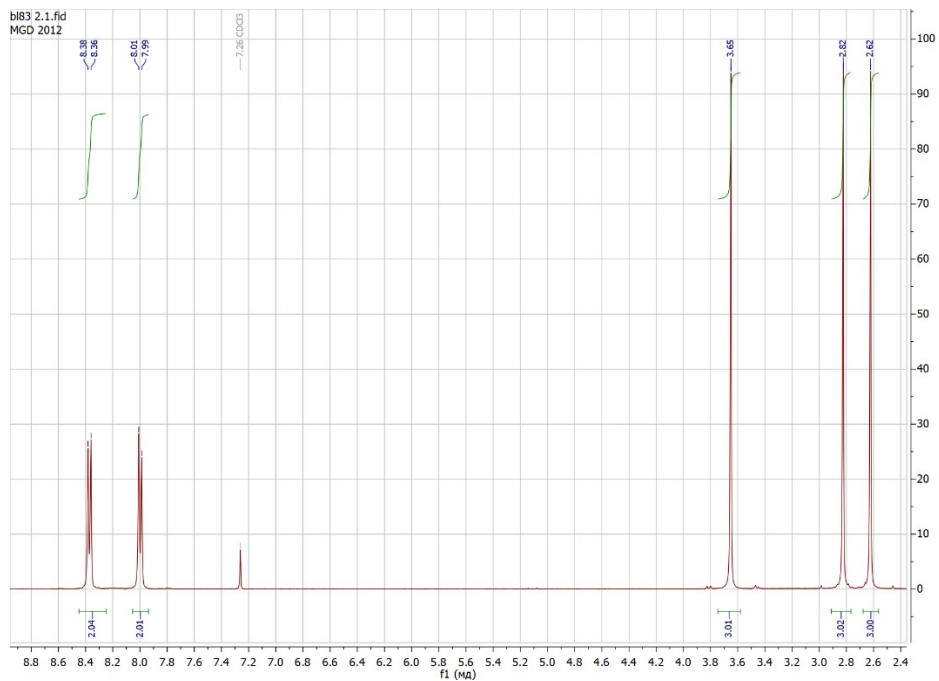

$^1\text{H}$  NMR spectrum in  $\text{DMSO-d}_6$ :

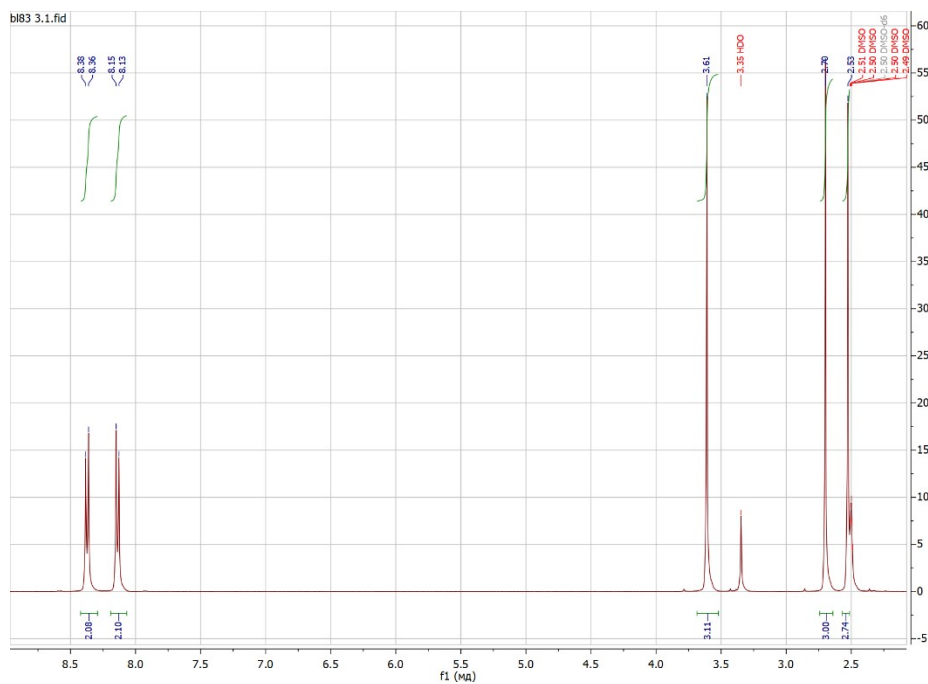

$^{13}\text{C}$  NMR spectrum in  $\text{DMSO-d}_6$ :

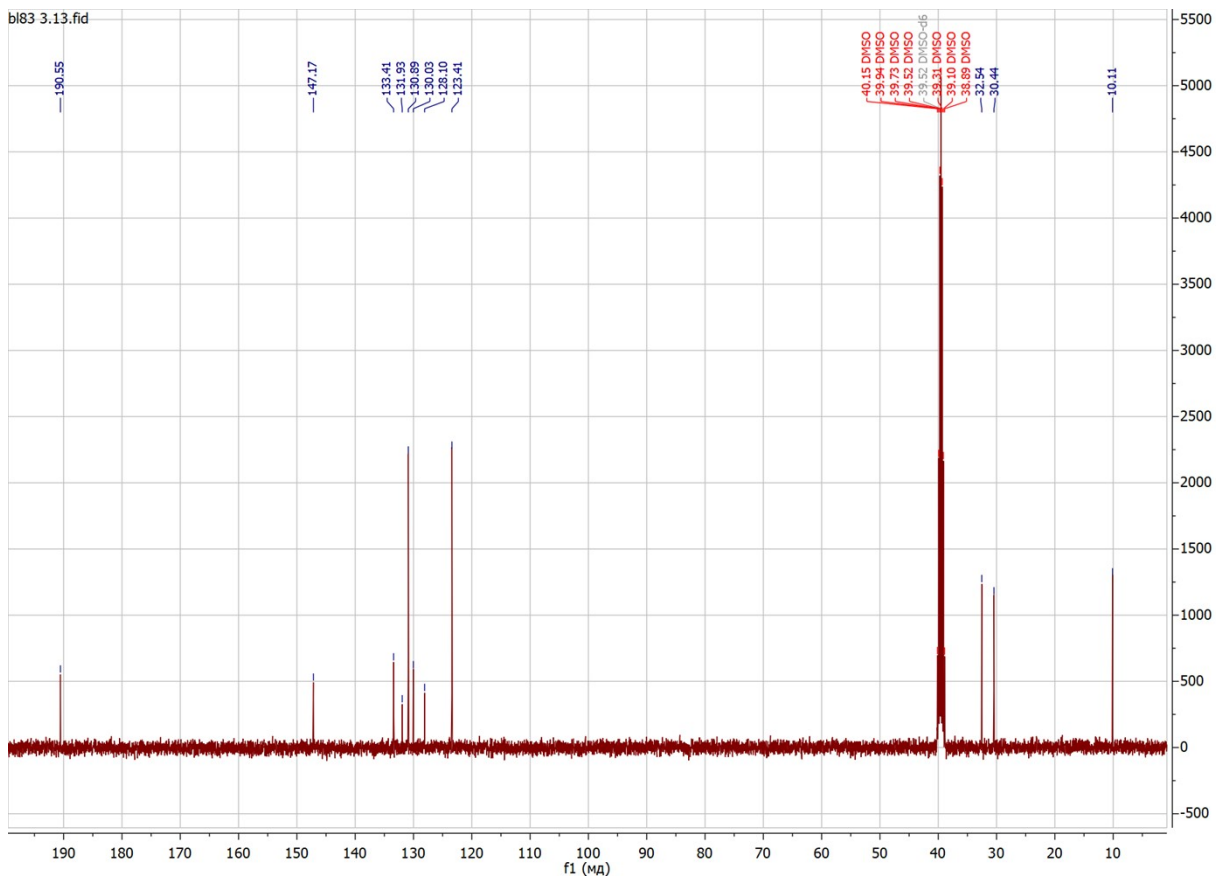

HSQC in  $\text{CDCl}_3$ :

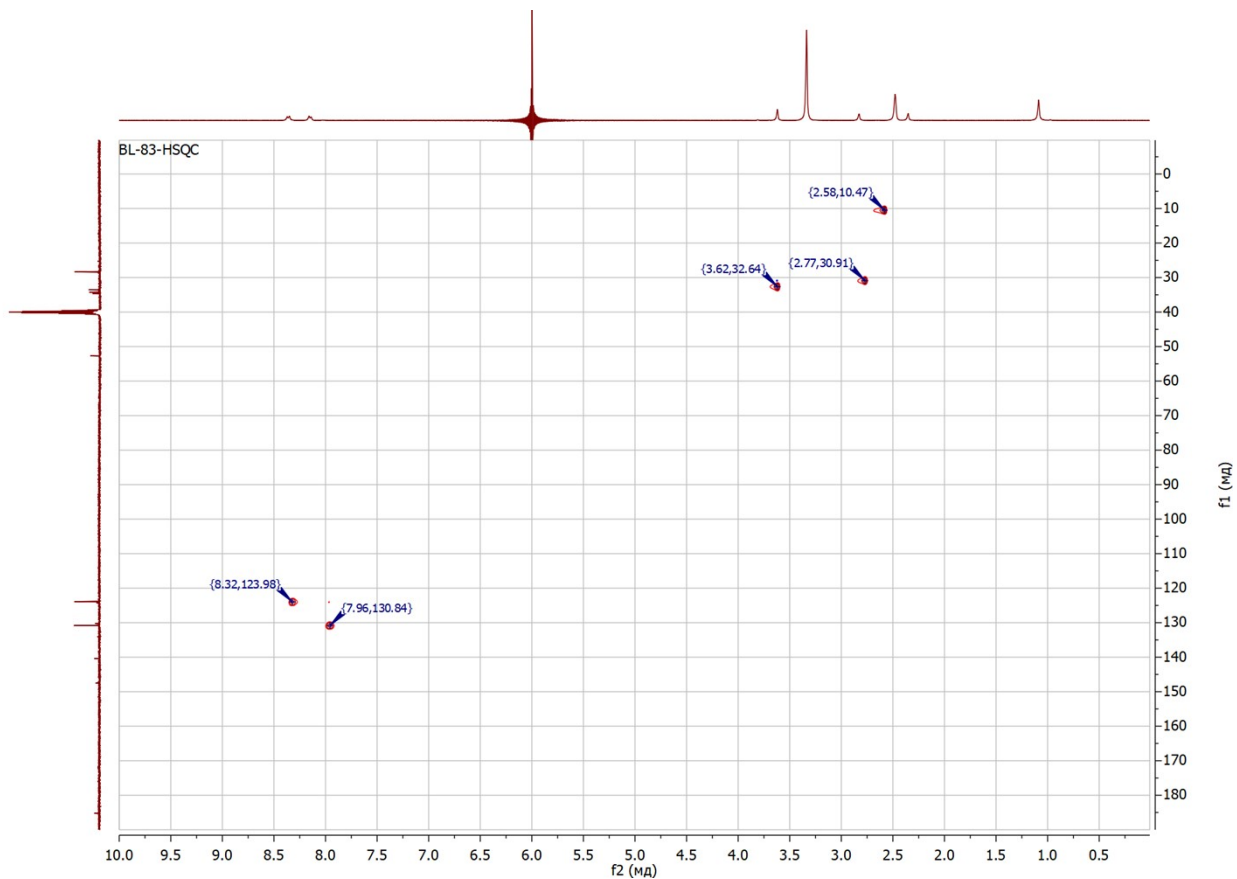

HMBC in CDCl<sub>3</sub>:

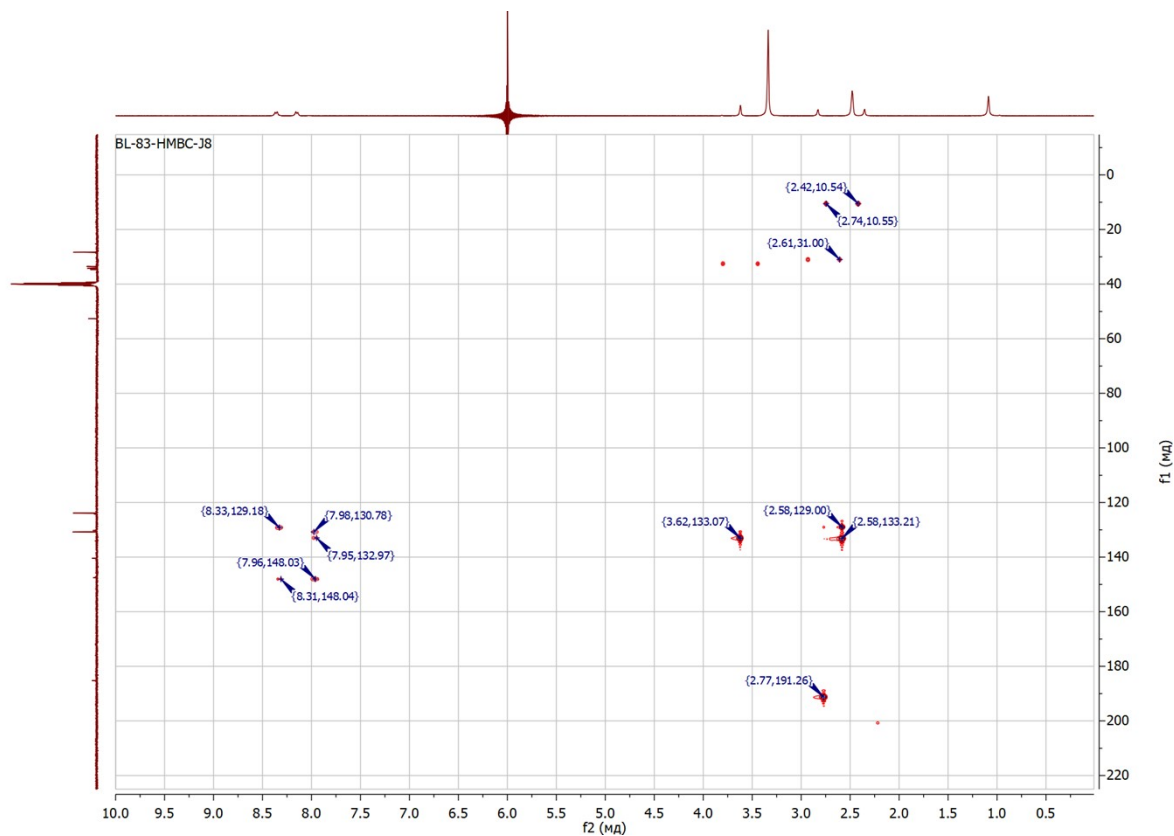

HRMS (ESI):

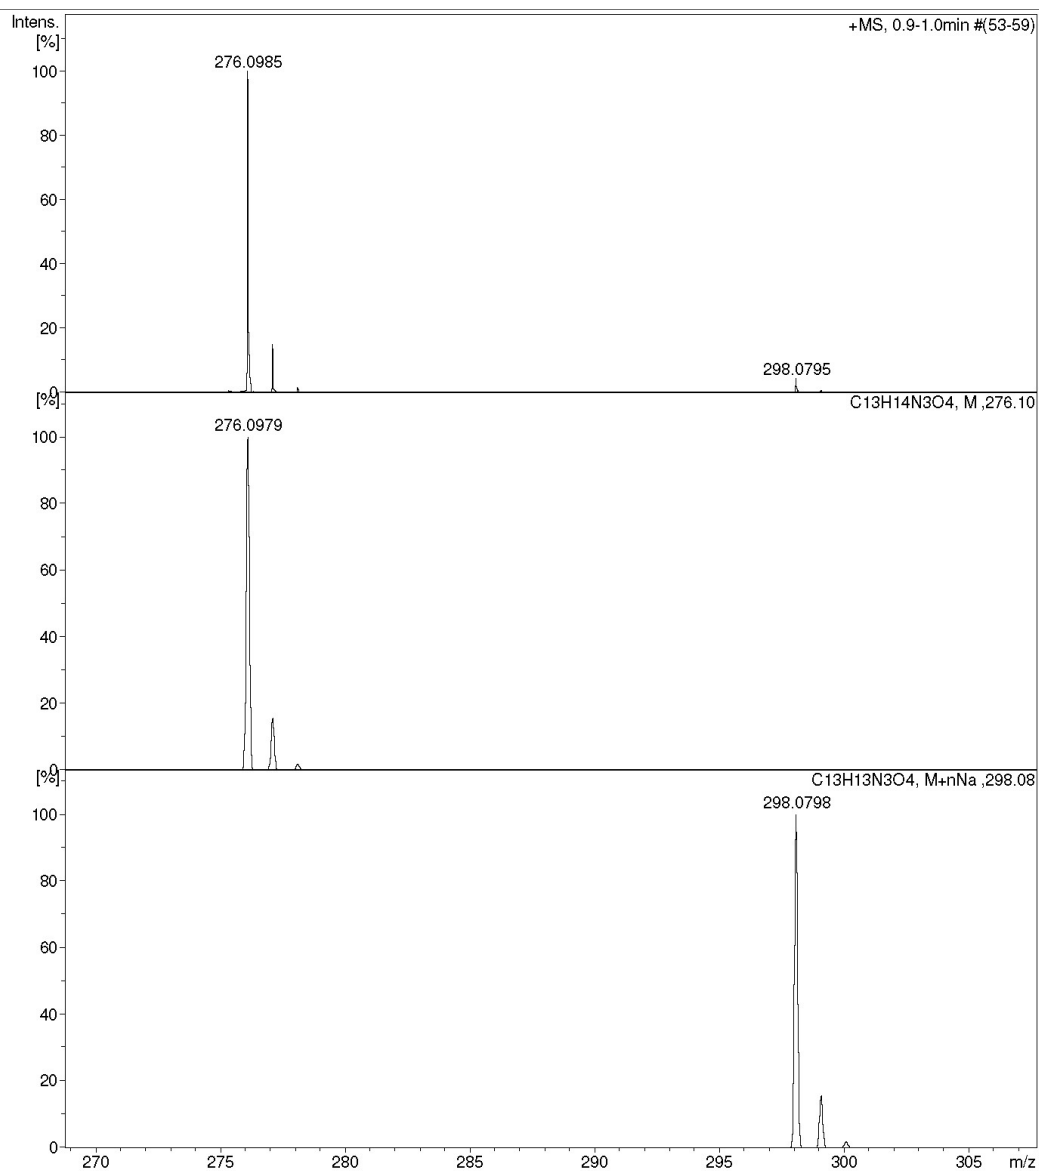

4-Acetyl-2-(4-cyanophenyl)-1,5-dimethyl-1H-imidazole 3-oxide (**10b**)

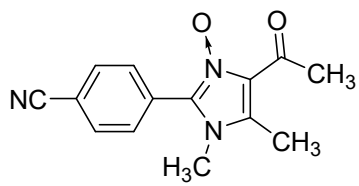

**10b**

<sup>1</sup>H NMR spectrum in CDCl<sub>3</sub>:

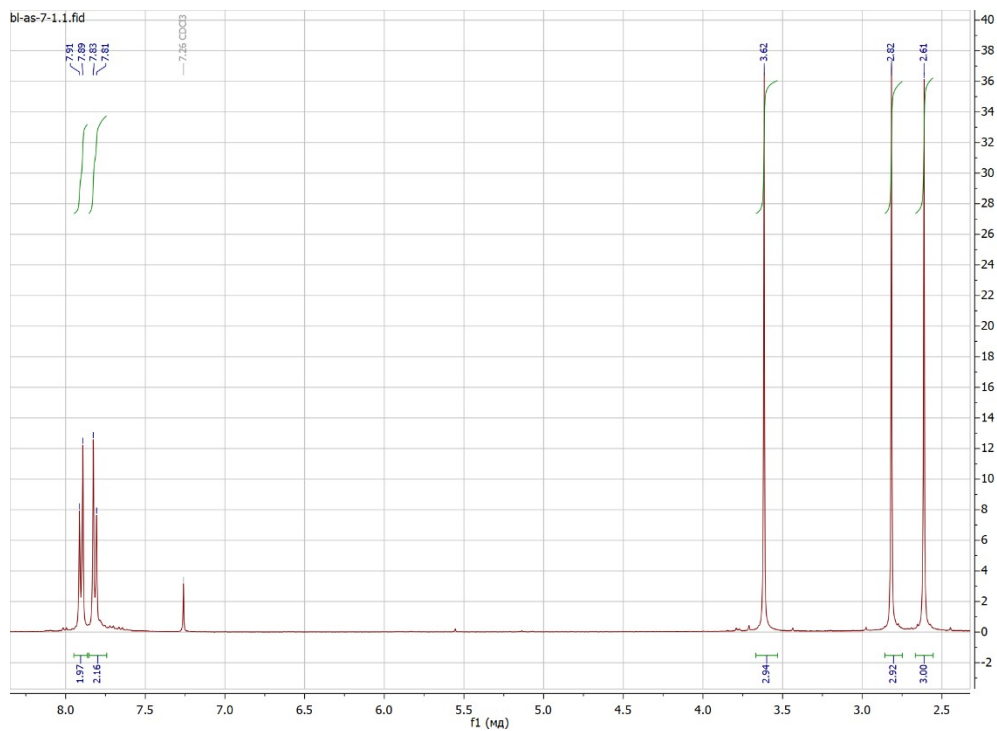

<sup>1</sup>H NMR spectrum in DMSO-d<sub>6</sub>:

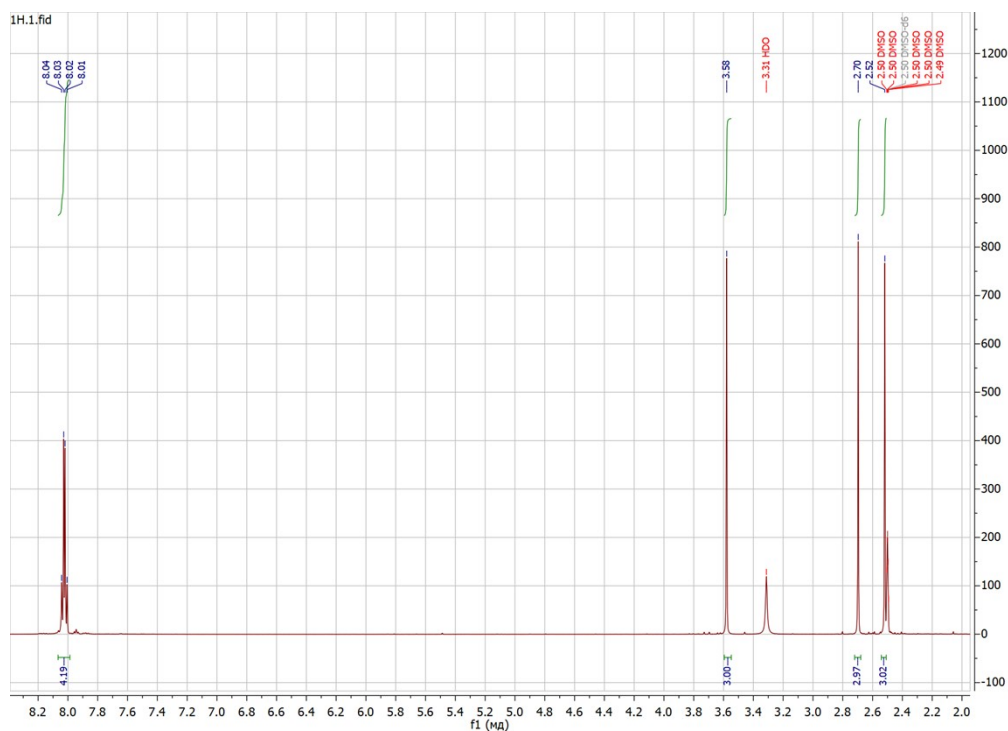





3-(Benzyloxy)-6,6-dimethyl-2-(4-nitrophenyl)-3,5,6,7-tetrahydro-4H-benzo[d]imidazol-4-one  
(11a)

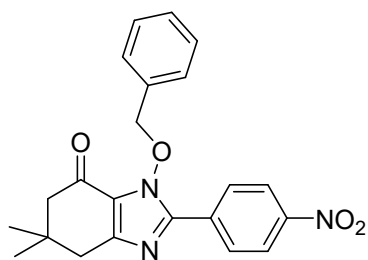

11a

$^1\text{H}$  NMR spectrum in  $\text{DMSO-d}_6$ :

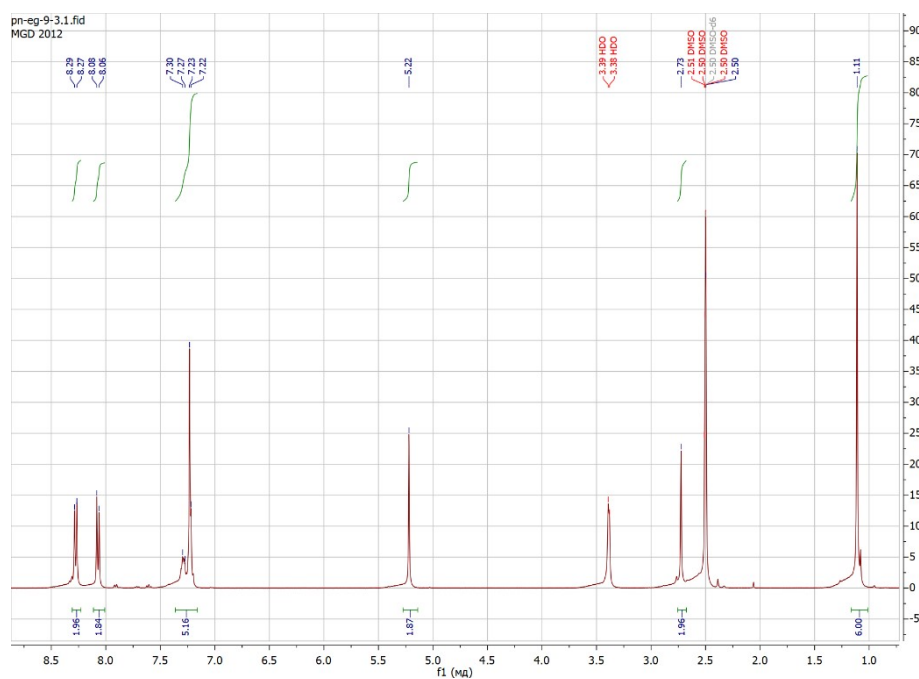

$^{13}\text{C}$  NMR spectrum in  $\text{DMSO-d}_6$ :

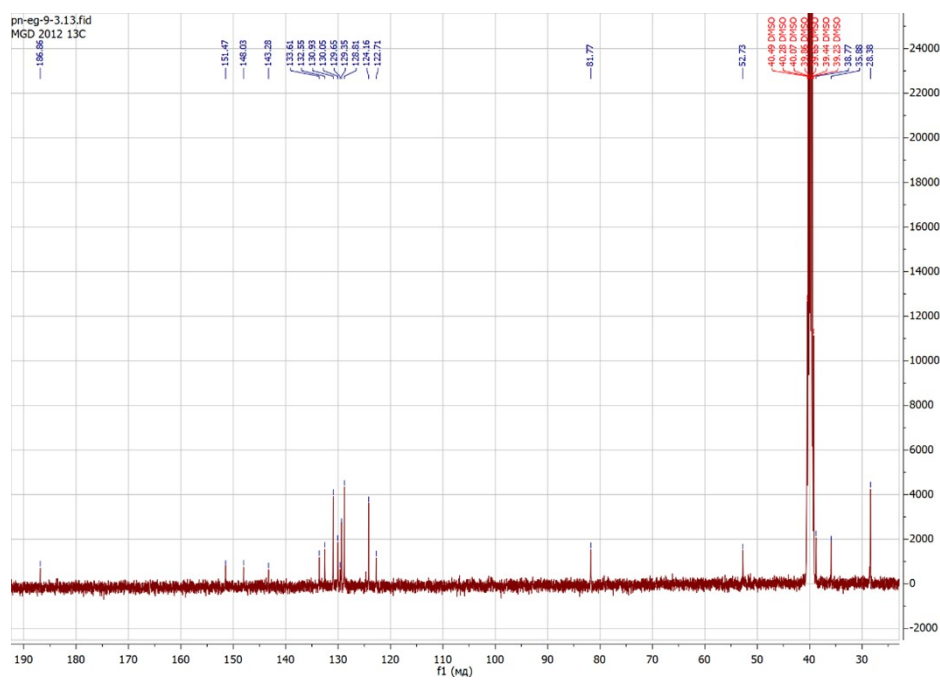

# HRMS (EI):

PANI-188 #6 RT: 0.46 AV: 1 NL: 1.18E7  
T: + c EI Full ms [ 14.50-430.50]

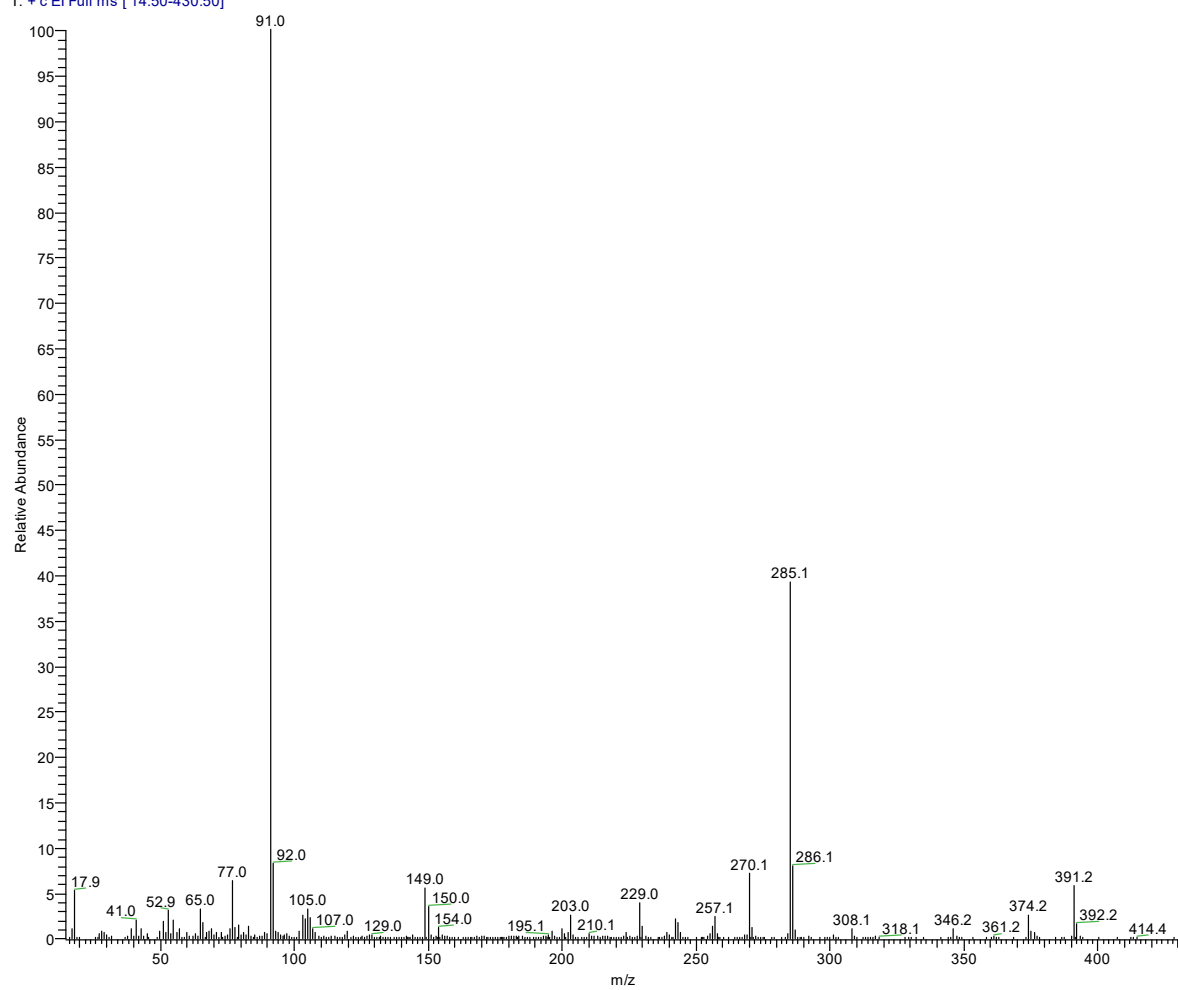

3-((2-Bromobenzyl)oxy)-6,6-dimethyl-2-(4-nitrophenyl)-3,5,6,7-tetrahydro-4H-benzo[d]imidazol-4-one (**11b**)

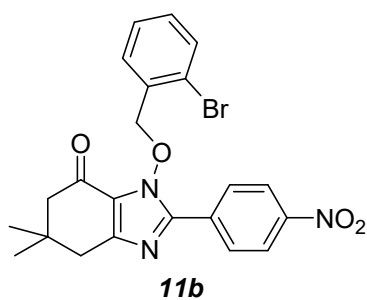

$^1\text{H}$  NMR spectrum in  $\text{DMSO-d}_6$ :

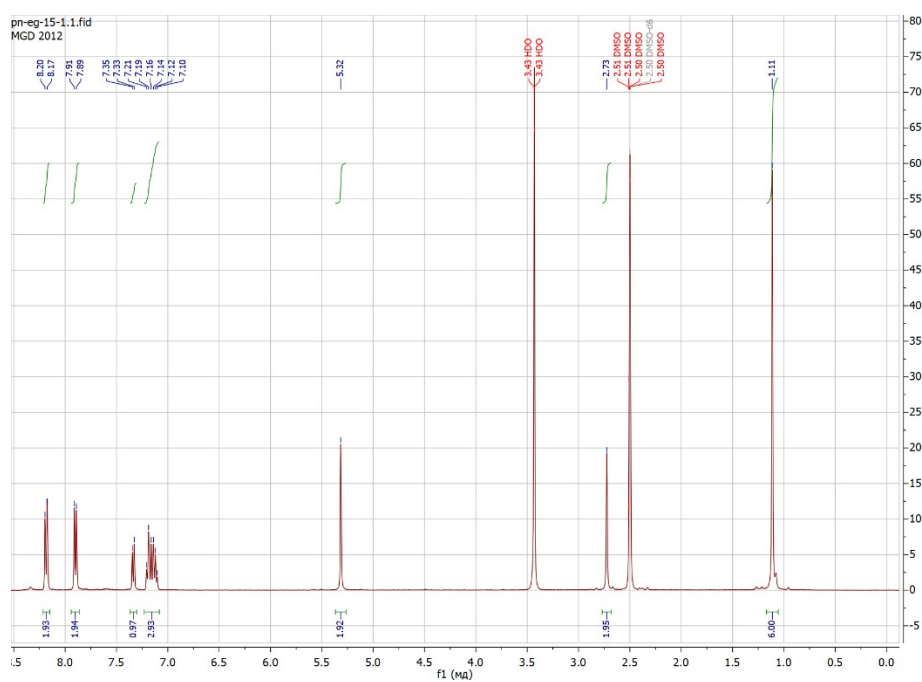

$^{13}\text{C}$  NMR spectrum in  $\text{DMSO-d}_6$ :

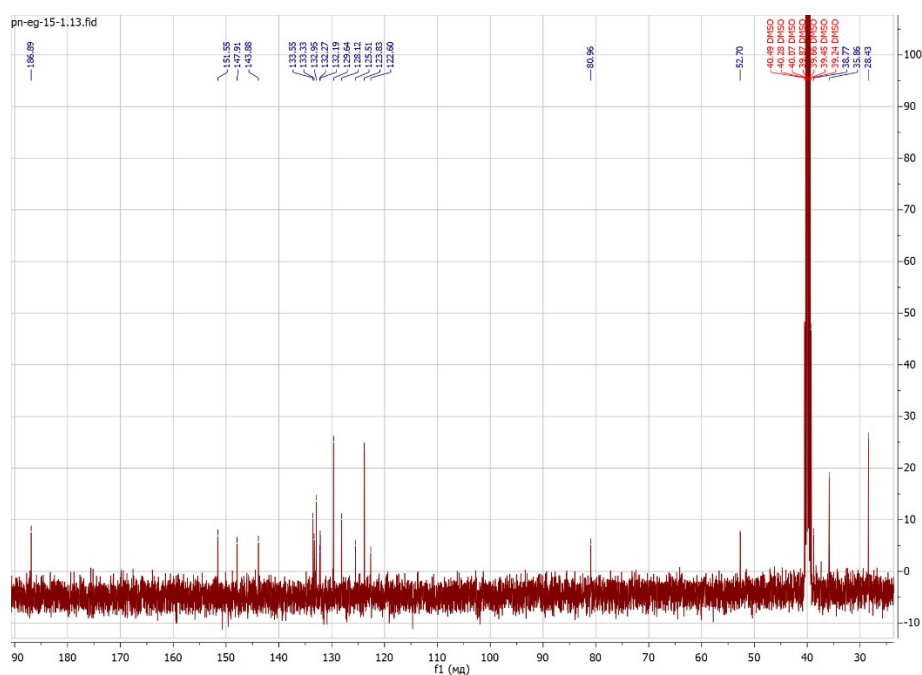

# HRMS (EI):

PANI-189 #2 RT: 0.07 AV: 1 NL: 1.50E6  
T: + c EI Full ms [ 32.50-500.50]

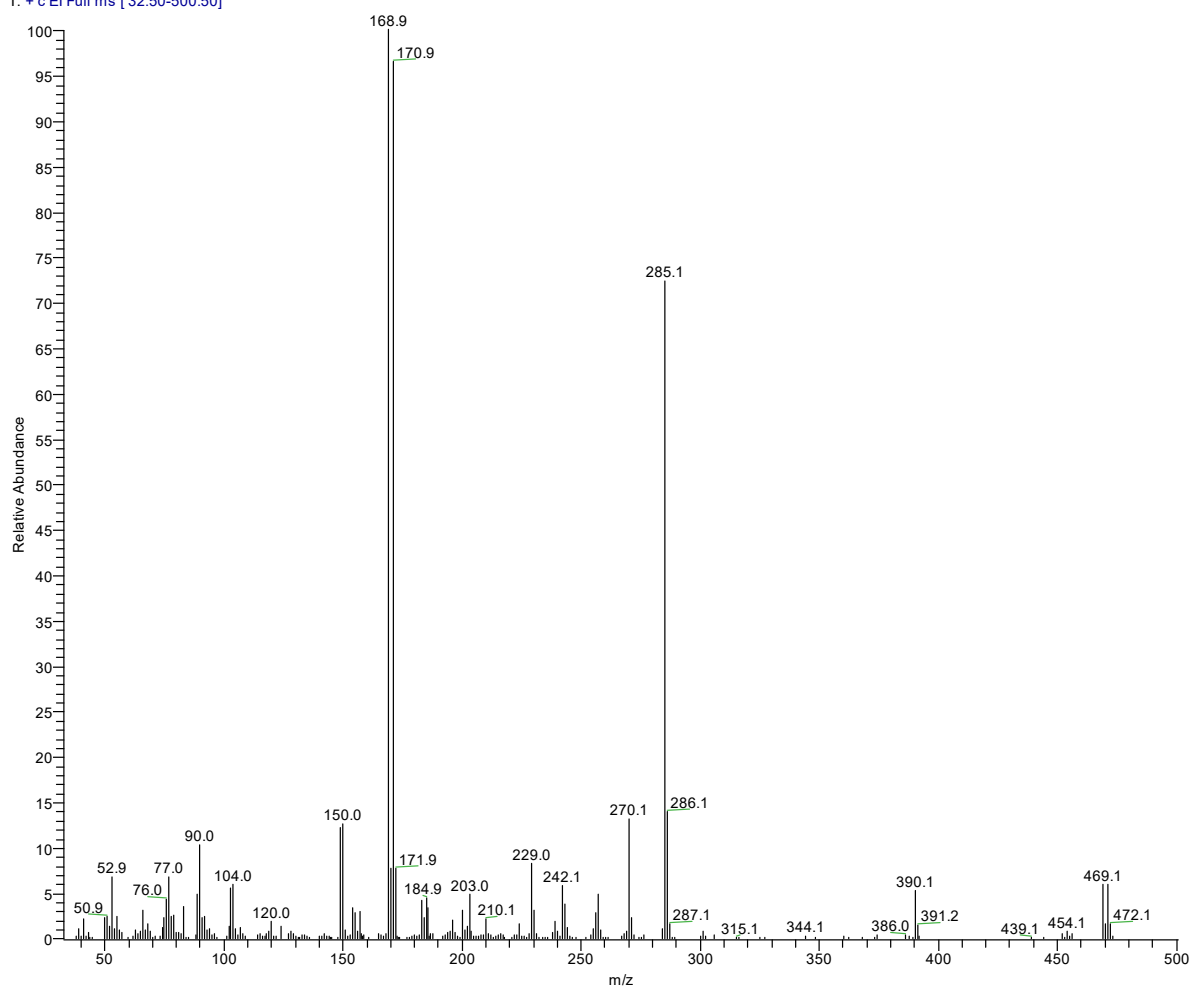

3-((3,4-Dichlorobenzyl)oxy)-6,6-dimethyl-2-(4-nitrophenyl)-3,5,6,7-tetrahydro-4H-benzo[d]imidazol-4-one (**11c**)

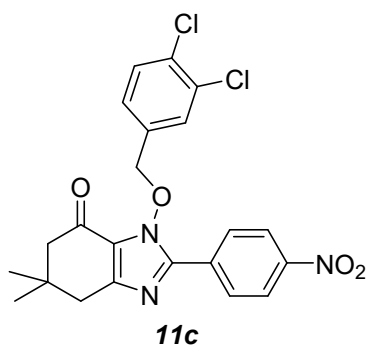

$^1\text{H}$  NMR spectrum in  $\text{DMSO-d}_6$ :

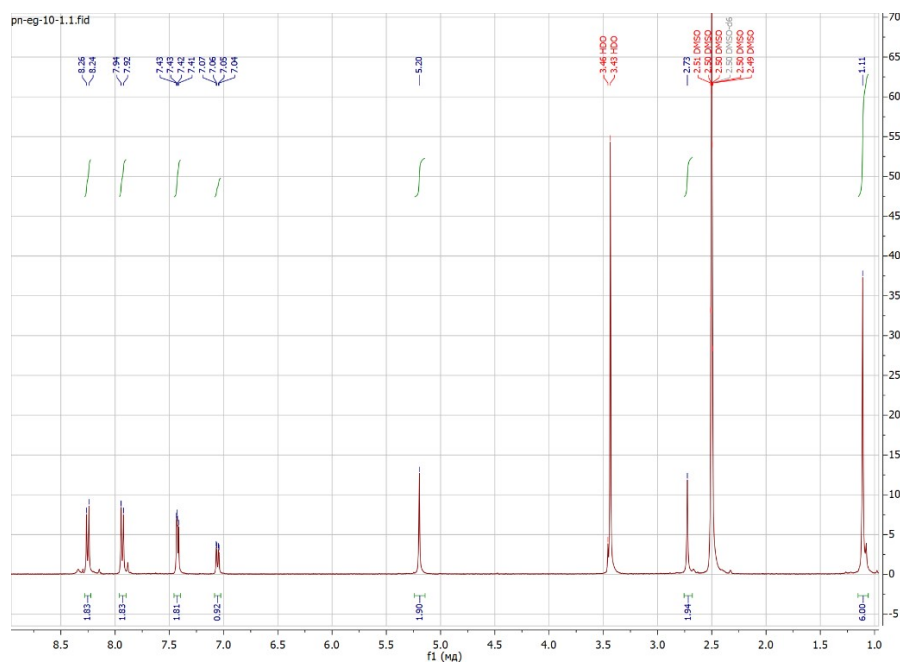

$^{13}\text{C}$  NMR spectrum in  $\text{DMSO-d}_6$ :

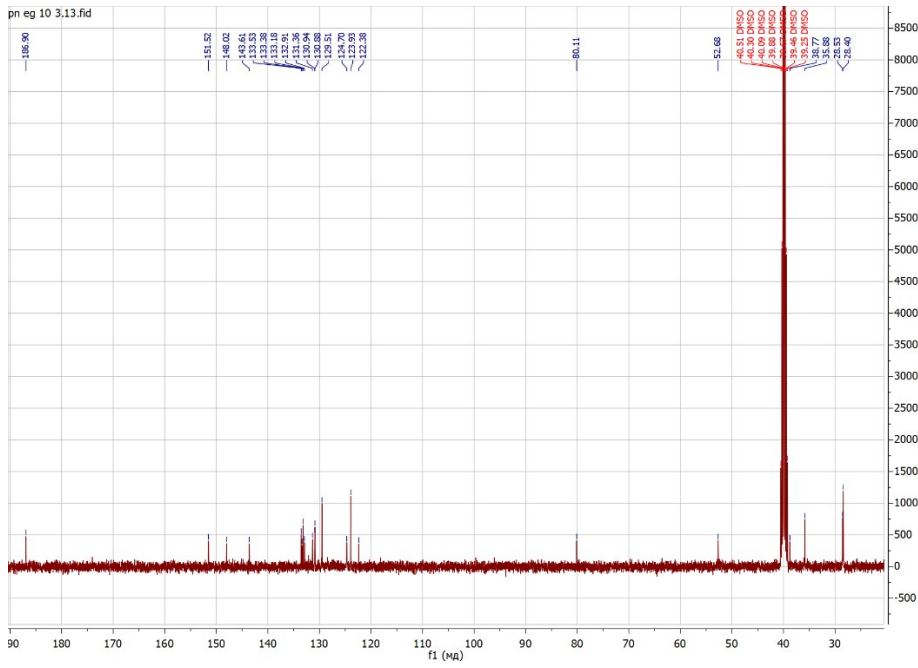

HRMS (EI):

PANI-191 #1 RT: 0.00 AV: 1 NL: 4.75E4  
 T: + c EI Full ms [ 14.50-490.50]

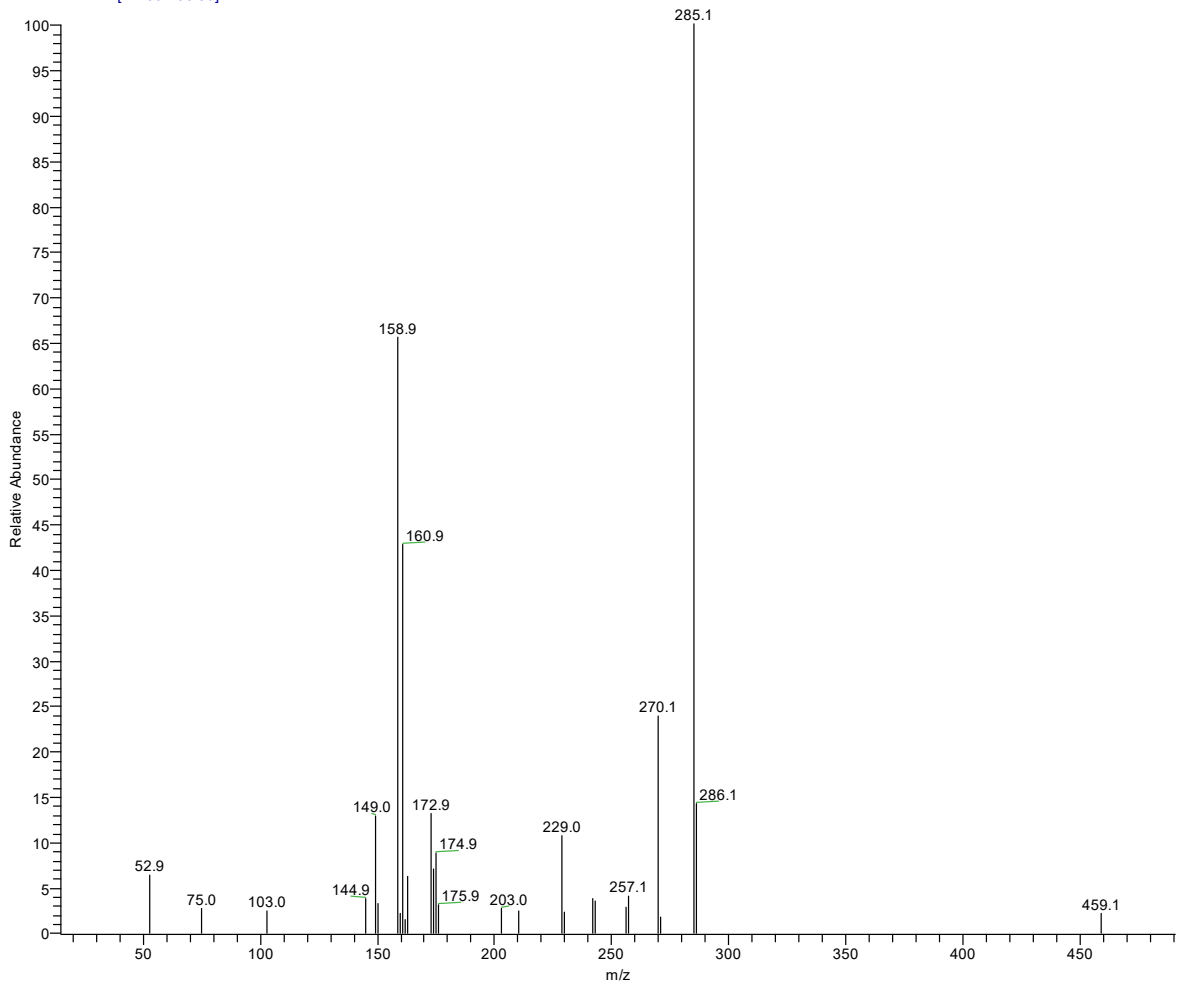

3-((2,6-Difluorobenzyl)oxy)-6,6-dimethyl-2-(4-nitrophenyl)-3,5,6,7-tetrahydro-4H-benzo[d]imidazol-4-one (**11d**)

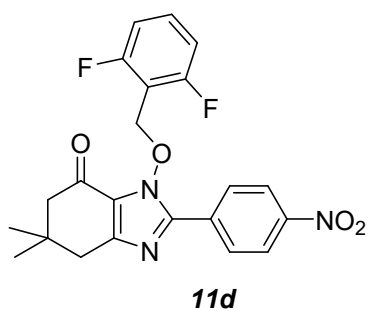

$^1\text{H}$  NMR spectrum in  $\text{DMSO-d}_6$ :

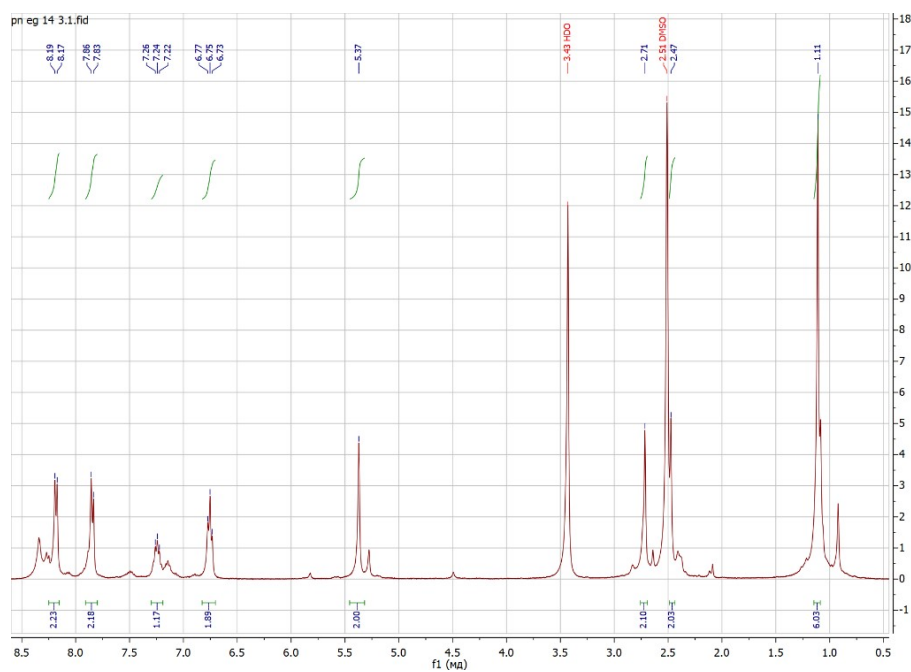

$^{13}\text{C}$  NMR spectrum in  $\text{DMSO-d}_6$ :

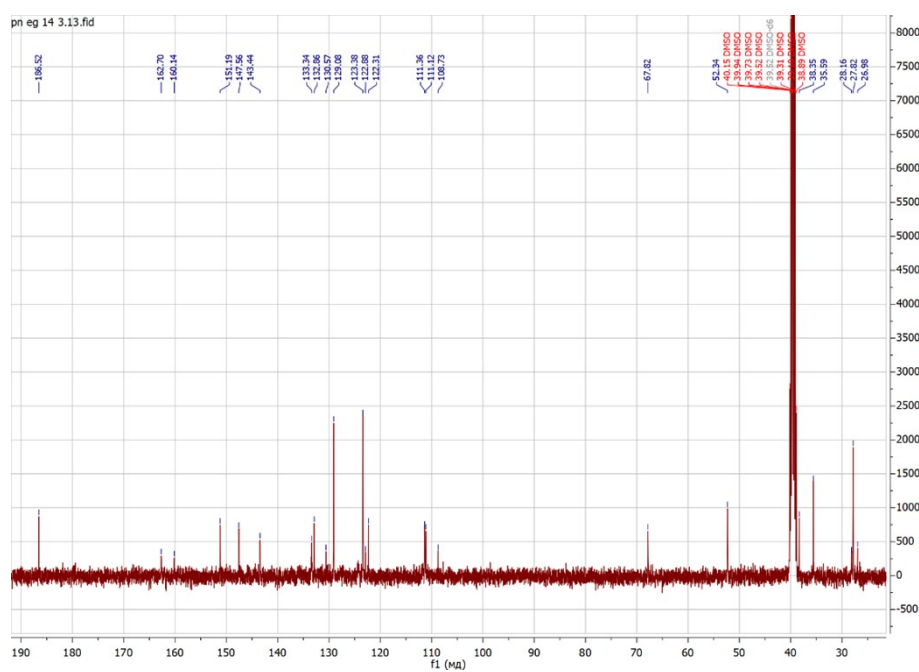

# HRMS (EI):

PANI-192 #17 RT: 1.01 AV: 1 NL: 4.83E6  
T: + c EI Full ms [ 14.50-500.50]

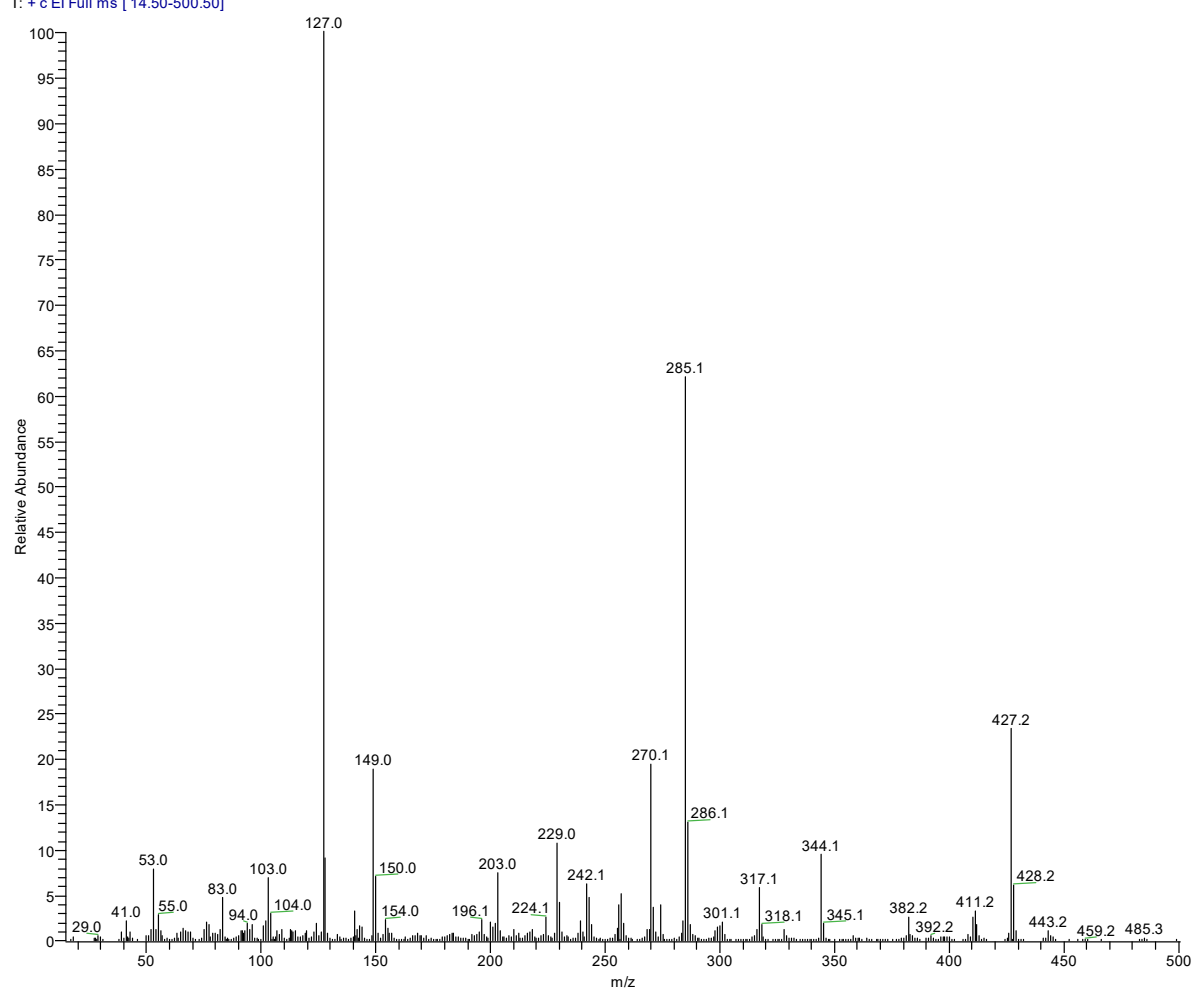



3-((2,5-Dimethylbenzyl)oxy)-6,6-dimethyl-2-(4-nitrophenyl)-3,5,6,7-tetrahydro-4H-benzo[d]imidazol-4-one (**11e**)

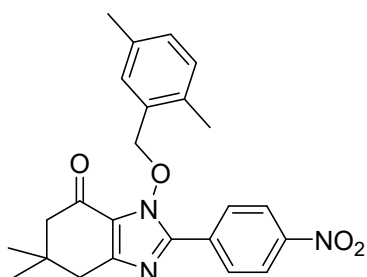

**11e**

$^1\text{H}$  NMR spectrum in  $\text{DMSO-d}_6$ :

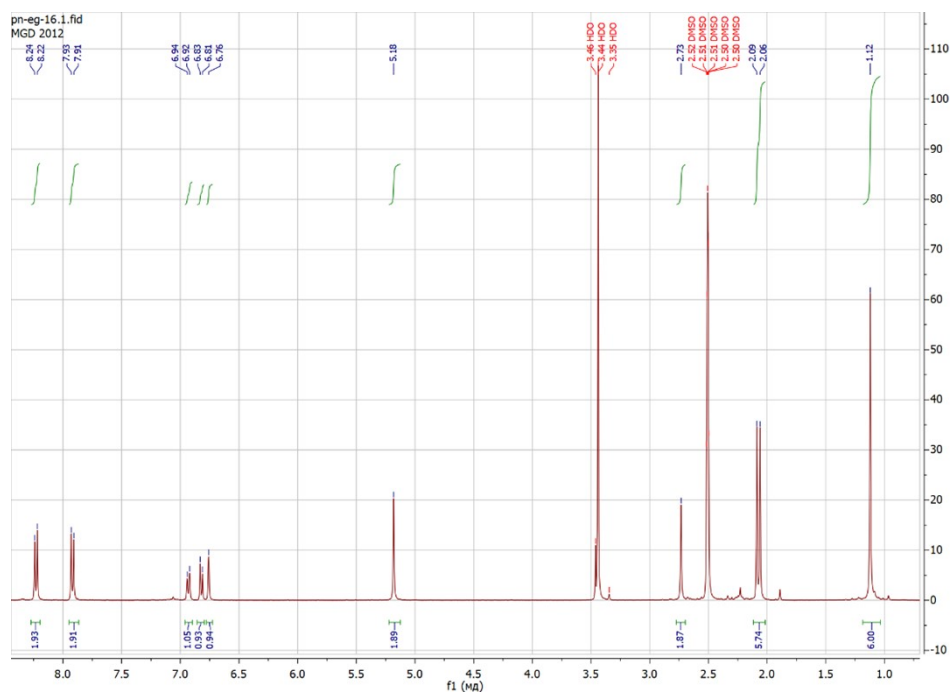

$^{13}\text{C}$  NMR spectrum in  $\text{DMSO-d}_6$ :

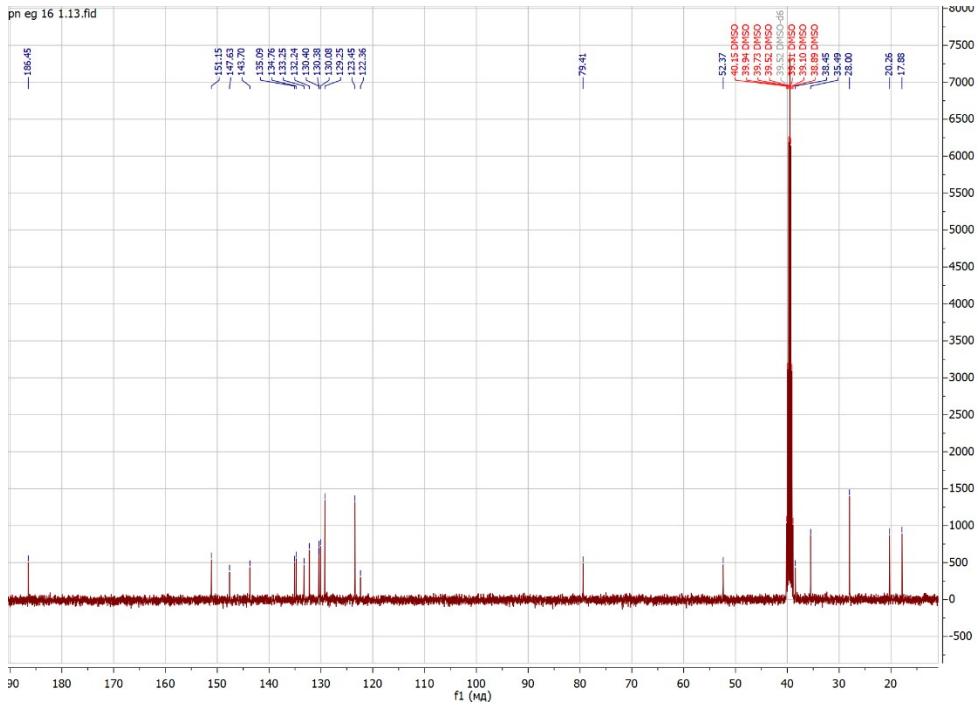

HRMS (EI):

PANI-190 #4 RT: 0.19 AV: 1 NL: 6.77E6  
 T: + c EI Full ms [ 32.50-460.50]

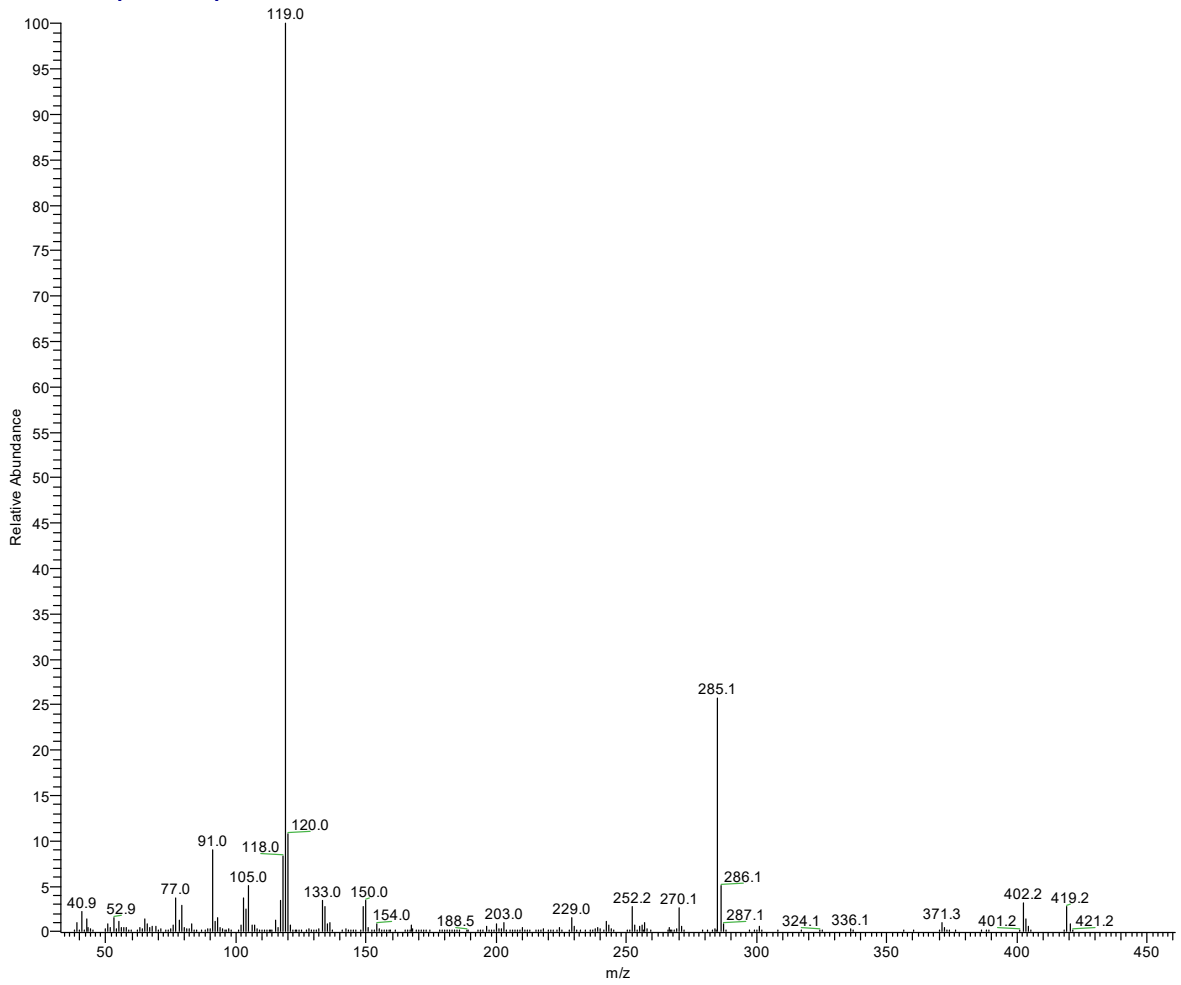

*(E)*-*N*-benzyl-1-(4-nitrophenyl)methanimine (**12**)

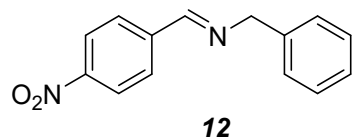

<sup>1</sup>H NMR spectrum in DMSO-d<sub>6</sub>:

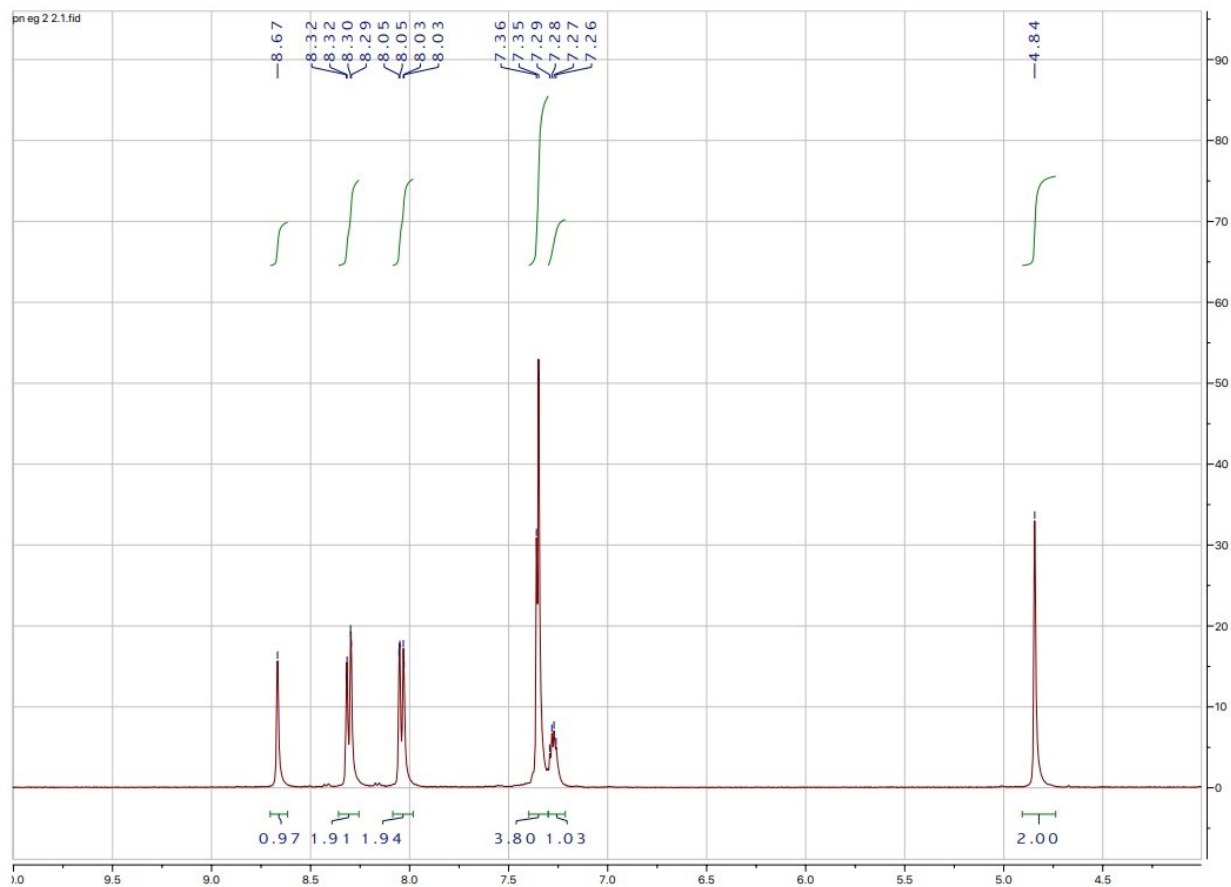

1-Benzyl-6,6-dimethyl-2-(4-nitrophenyl)-4-oxo-4,5,6,7-tetrahydro-1H-benzo[d]imidazole 3-oxide (13)

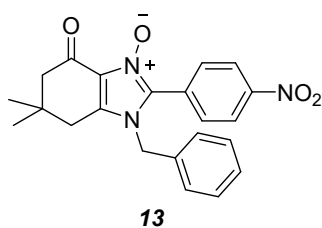

$^1\text{H}$  NMR spectrum in  $\text{DMSO-d}_6$ :

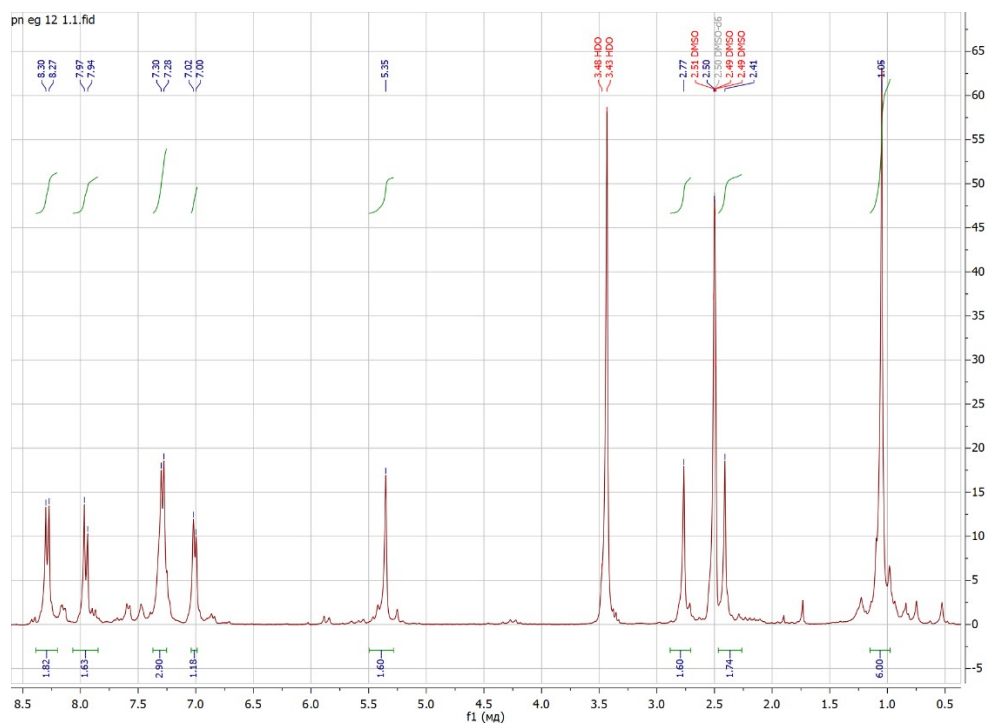

$^{13}\text{C}$  NMR spectrum in  $\text{DMSO-d}_6$ :

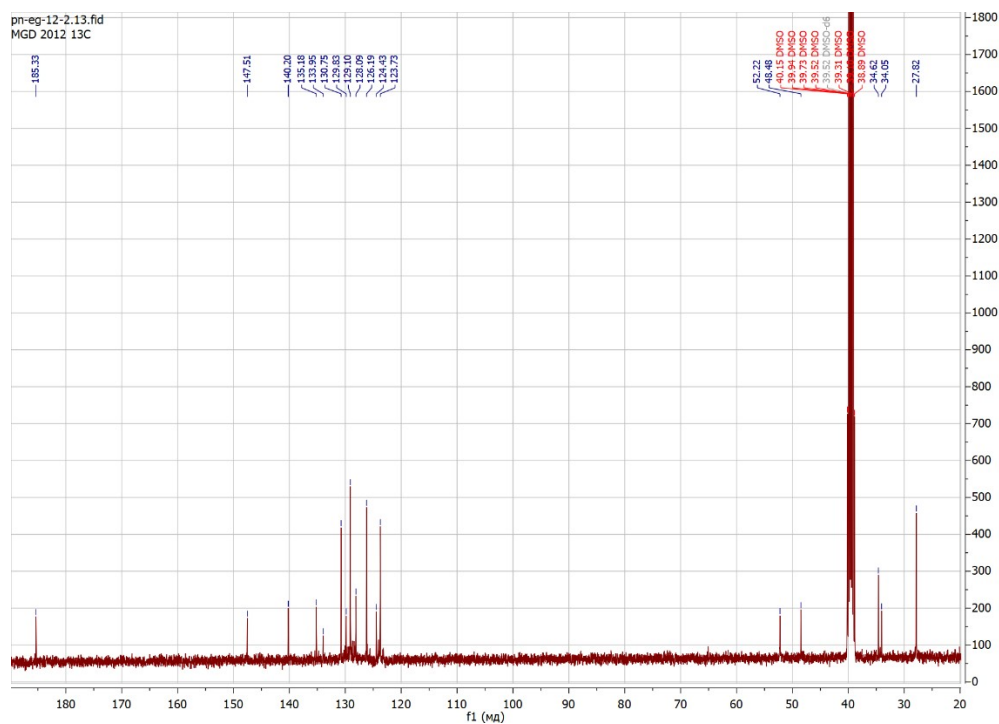

# HRMS (EI):

PANI-187 #1 RT: 0.00 AV: 1 NL: 3.59E5  
T: + c EI Full ms [ 14.50-430.50]

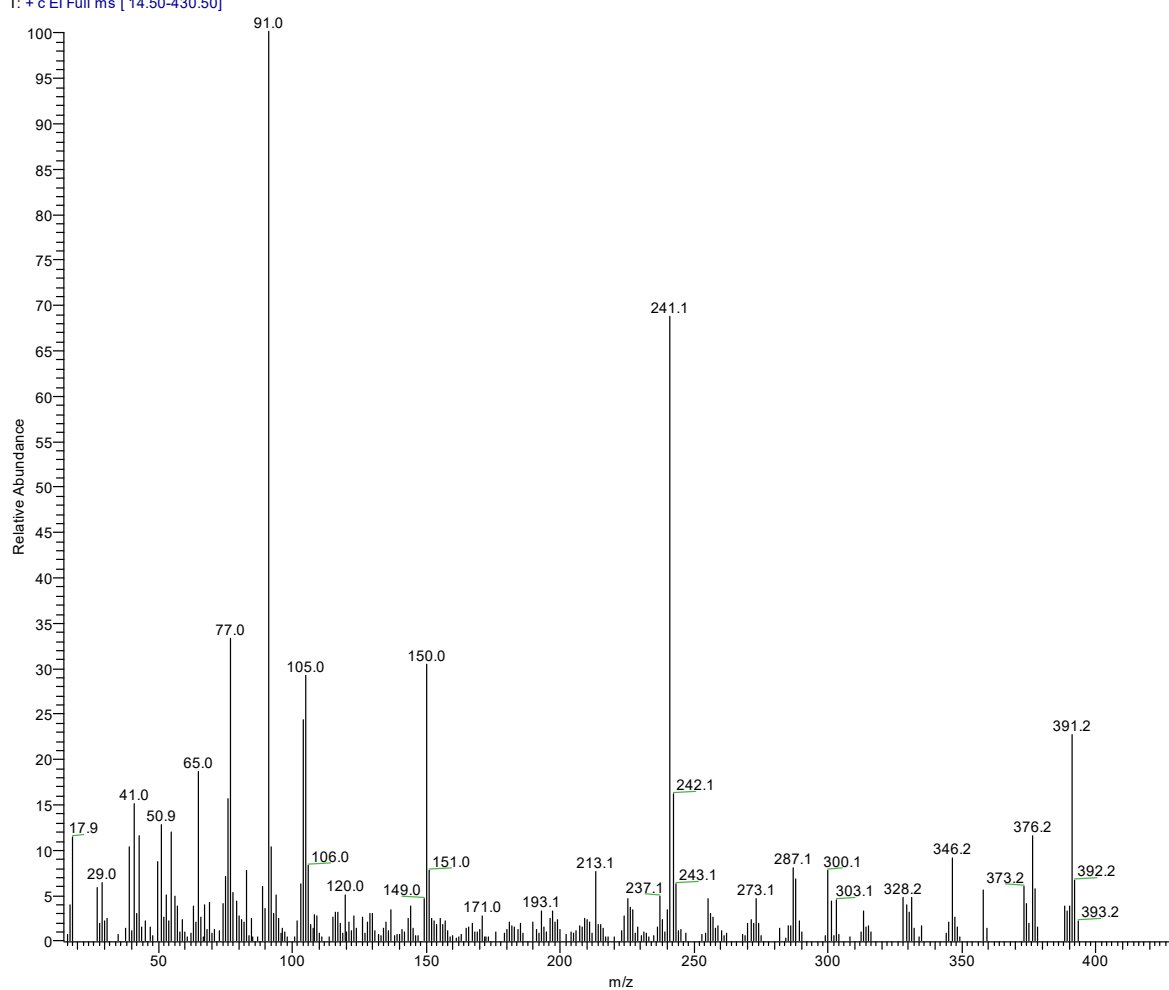

Supplement: d4md00181h1.pdf [file d4md00181h1.pdf]
